# Supplementary material for: Quinoline alkaloids with anti-inflammatory activity from Zanthoxylum avicennae
Source: Royal Society of Chemistry journal article supplement (doi:10.1039/d2ob00711h), 2022-01-01

## Supplementary Material

### Quinoline Alkaloids with Anti-inflammatory Activity from *Zanthoxylum avicennae*

Kai-Long Ji,<sup>‡ab</sup> Wei Liu,<sup>‡ab</sup> Wei-Hang Yin,<sup>ab</sup> Jing-Ya Li,<sup>\*ab</sup> and Jian-Min Yue<sup>\*ab</sup>

<sup>a</sup> State Key Laboratory of Drug Research, Shanghai Institute of Materia Medica,  
Chinese Academy of Sciences, 555 Zuchongzhi Road, Zhangjiang Hi-Tech Park,  
Shanghai 201203, China

<sup>b</sup> University of Chinese Academy of Sciences, No.19A Yuquan Road, Beijing  
100049, China

#### Corresponding Authors:

\*E-mail: jyli@simm.ac.cn (J. Y. Li) and jmyue@simm.ac.cn (J. M. Yue)

<sup>‡</sup> These authors contributed equally.

## Table of Contents

|                                                                                                                                                |    |
|------------------------------------------------------------------------------------------------------------------------------------------------|----|
| <b>Fig. S1</b> ECD spectrum of compound <b>1</b> .....                                                                                         | 4  |
| <b>Fig. S2</b> Chiral HPLC separation of compound <b>1</b> .....                                                                               | 5  |
| <b>Fig. S3</b> Key <sup>1</sup> H- <sup>1</sup> H COSY and HMBC correlations of <b>2–6</b> .....                                               | 6  |
| <b>Fig. S4</b> Chiral HPLC separation of compound <b>7</b> .....                                                                               | 7  |
| <b>Fig. S5</b> ECD spectra of two enantiomers (+)- <b>7</b> and (-)- <b>7</b> .....                                                            | 8  |
| <b>Fig. S6</b> Chiral HPLC separation of compound <b>8</b> .....                                                                               | 9  |
| <b>Fig. S7</b> ECD spectra of two enantiomers (+)- <b>8</b> and (-)- <b>8</b> .....                                                            | 10 |
| <b>Fig. S8.</b> The effect of Compound <b>2–10</b> on the gene expression level of IL-1β in RAW264.7 cells .....                               | 11 |
|                                                                                                                                                |    |
| <b>Table S1</b> <sup>1</sup> H and <sup>13</sup> C NMR data for <b>5</b> and <b>6</b> in CDCl <sub>3</sub> (δ in ppm and <i>J</i> in Hz) ..... | 12 |
| <b>Table S2</b> X-ray crystallographic data for compound <b>1</b> .....                                                                        | 13 |
| <b>Table S3</b> X-ray crystallographic data for compound (-)- <b>1</b> .....                                                                   | 14 |
| <b>Table S4</b> X-ray crystallographic data for compound (+)- <b>7</b> .....                                                                   | 15 |
| <b>Table S5</b> Primer sequences used in RT-PCR analysis .....                                                                                 | 16 |
|                                                                                                                                                |    |
| <b>Fig. S9</b> <sup>1</sup> H NMR spectrum of <b>1</b> in CDCl <sub>3</sub> .....                                                              | 17 |
| <b>Fig. S10</b> <sup>13</sup> C NMR spectrum of <b>1</b> in CDCl <sub>3</sub> .....                                                            | 18 |
| <b>Fig. S11</b> HSQC spectrum of <b>1</b> .....                                                                                                | 19 |
| <b>Fig. S12</b> HMBC spectrum of <b>1</b> .....                                                                                                | 19 |
| <b>Fig. S13</b> COSY spectrum of <b>1</b> .....                                                                                                | 20 |
| <b>Fig. S14</b> ROESY spectrum of <b>1</b> .....                                                                                               | 20 |
| <b>Fig. S15</b> ESI-MS spectrum of <b>1</b> .....                                                                                              | 21 |
| <b>Fig. S16</b> HRESI-MS spectrum of <b>1</b> .....                                                                                            | 21 |
| <b>Fig. S17</b> IR spectrum of <b>1</b> .....                                                                                                  | 22 |
| <b>Fig. S18</b> <sup>1</sup> H NMR spectrum of <b>2</b> in CDCl <sub>3</sub> .....                                                             | 23 |
| <b>Fig. S19</b> <sup>13</sup> C NMR spectrum of <b>2</b> in CDCl <sub>3</sub> .....                                                            | 24 |
| <b>Fig. S20</b> HSQC spectrum of <b>2</b> .....                                                                                                | 25 |
| <b>Fig. S21</b> HMBC spectrum of <b>2</b> .....                                                                                                | 25 |
| <b>Fig. S22</b> COSY spectrum of <b>2</b> .....                                                                                                | 26 |
| <b>Fig. S23</b> ESI-MS spectrum of <b>2</b> .....                                                                                              | 26 |
| <b>Fig. S24</b> HRESI-MS spectrum of <b>2</b> .....                                                                                            | 27 |
| <b>Fig. S25</b> IR spectrum of <b>2</b> .....                                                                                                  | 28 |
| <b>Fig. S26</b> <sup>1</sup> H NMR spectrum of <b>3</b> in CDCl <sub>3</sub> .....                                                             | 29 |
| <b>Fig. S27</b> <sup>13</sup> C NMR spectrum of <b>3</b> in CDCl <sub>3</sub> .....                                                            | 30 |
| <b>Fig. S28</b> HSQC spectrum of <b>3</b> .....                                                                                                | 31 |
| <b>Fig. S29</b> HMBC spectrum of <b>3</b> .....                                                                                                | 31 |
| <b>Fig. S30</b> COSY spectrum of <b>3</b> .....                                                                                                | 32 |
| <b>Fig. S31</b> ESI-MS spectrum of <b>3</b> .....                                                                                              | 32 |
| <b>Fig. S32</b> HRESI-MS spectrum of <b>3</b> .....                                                                                            | 33 |
| <b>Fig. S33</b> IR spectrum of <b>3</b> .....                                                                                                  | 34 |

|                                                                                               |    |
|-----------------------------------------------------------------------------------------------|----|
| <b>Fig. S34</b> $^1\text{H}$ NMR spectrum of <b>4</b> in $\text{CDCl}_3$ .....                | 35 |
| <b>Fig. S35</b> $^{13}\text{C}$ NMR spectrum of <b>4</b> in $\text{CDCl}_3$ .....             | 36 |
| <b>Fig. S36</b> HSQC spectrum of <b>4</b> .....                                               | 37 |
| <b>Fig. S37</b> HMBC spectrum of <b>4</b> .....                                               | 37 |
| <b>Fig. S38</b> COSY spectrum of <b>4</b> .....                                               | 38 |
| <b>Fig. S39</b> ESI-MS spectrum of <b>4</b> .....                                             | 38 |
| <b>Fig. S40</b> HRESI-MS spectrum of <b>4</b> .....                                           | 39 |
| <b>Fig. S41</b> IR spectrum of <b>4</b> .....                                                 | 40 |
| <b>Fig. S42</b> $^1\text{H}$ NMR spectrum of <b>5</b> in $\text{CDCl}_3$ .....                | 41 |
| <b>Fig. S43</b> $^{13}\text{C}$ NMR spectrum of <b>5</b> in $\text{CDCl}_3$ .....             | 42 |
| <b>Fig. S44</b> HSQC spectrum of <b>5</b> .....                                               | 43 |
| <b>Fig. S45</b> HMBC spectrum of <b>5</b> .....                                               | 43 |
| <b>Fig. S46</b> COSY spectrum of <b>5</b> .....                                               | 44 |
| <b>Fig. S47</b> ESI-MS spectrum of <b>5</b> .....                                             | 44 |
| <b>Fig. S48</b> HRESI-MS spectrum of <b>5</b> .....                                           | 45 |
| <b>Fig. S49</b> IR spectrum of <b>5</b> .....                                                 | 46 |
| <b>Fig. S50</b> $^1\text{H}$ NMR spectrum of <b>6</b> in $\text{CDCl}_3$ .....                | 47 |
| <b>Fig. S51</b> $^{13}\text{C}$ NMR spectrum of <b>6</b> in $\text{CDCl}_3$ .....             | 48 |
| <b>Fig. S52</b> HSQC spectrum of <b>6</b> .....                                               | 49 |
| <b>Fig. S53</b> HMBC spectrum of <b>6</b> .....                                               | 49 |
| <b>Fig. S54</b> COSY spectrum of <b>6</b> .....                                               | 50 |
| <b>Fig. S55</b> ROESY spectrum of <b>6</b> .....                                              | 50 |
| <b>Fig. S56</b> ESI-MS spectrum of <b>6</b> .....                                             | 51 |
| <b>Fig. S57</b> HRESI-MS spectrum of <b>6</b> .....                                           | 51 |
| <b>Fig. S58</b> IR spectrum of <b>6</b> .....                                                 | 52 |
| <b>Fig. S59</b> $^1\text{H}$ NMR spectrum of (+)- <b>7</b> in $\text{CD}_3\text{OD}$ .....    | 53 |
| <b>Fig. S60</b> $^{13}\text{C}$ NMR spectrum of (+)- <b>7</b> in $\text{CD}_3\text{OD}$ ..... | 54 |
| <b>Fig. S61</b> $^1\text{H}$ NMR spectrum of (-)- <b>7</b> in $\text{CD}_3\text{OD}$ .....    | 55 |
| <b>Fig. S62</b> HSQC spectrum of <b>7</b> .....                                               | 56 |
| <b>Fig. S63</b> HSQC spectrum of <b>7</b> .....                                               | 56 |
| <b>Fig. S64</b> COSY spectrum of <b>7</b> .....                                               | 57 |
| <b>Fig. S65.</b> ESI-MS spectrum of <b>7</b> .....                                            | 57 |
| <b>Fig. S66</b> HRESI-MS spectrum of <b>7</b> .....                                           | 58 |
| <b>Fig. S67</b> $^1\text{H}$ NMR spectrum of (+)- <b>8</b> in $\text{CDCl}_3$ .....           | 59 |
| <b>Fig. S68</b> $^{13}\text{C}$ NMR spectrum of (+)- <b>8</b> in $\text{CDCl}_3$ .....        | 60 |
| <b>Fig. S69</b> $^1\text{H}$ NMR spectrum of (-)- <b>8</b> in $\text{CDCl}_3$ .....           | 61 |
| <b>Fig. S70</b> ESI-MS spectrum of <b>8</b> .....                                             | 62 |

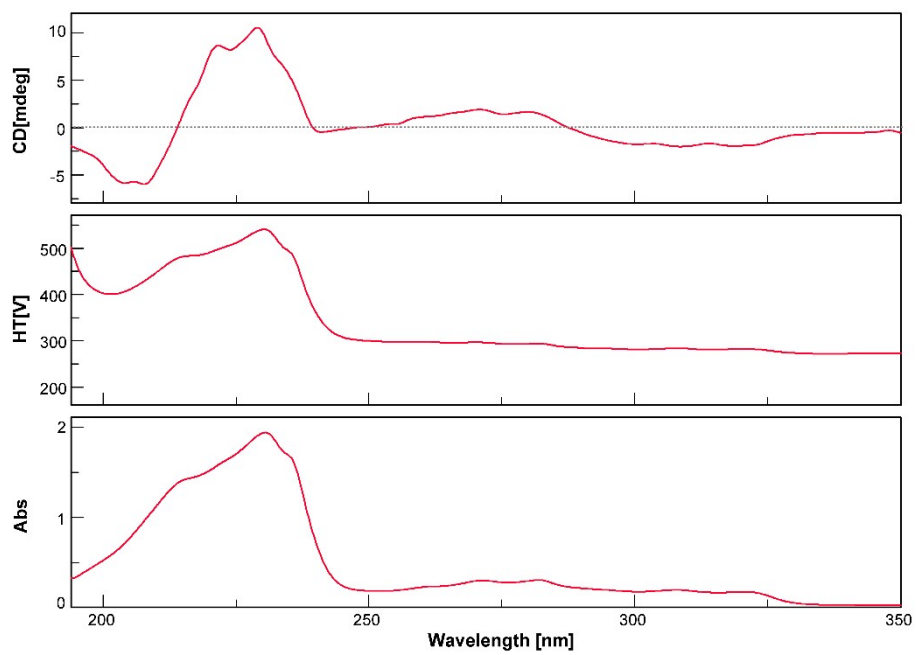

**Fig. S1** ECD spectrum of compound **1**

**Fig. S2** Chiral HPLC separation of compound **1**

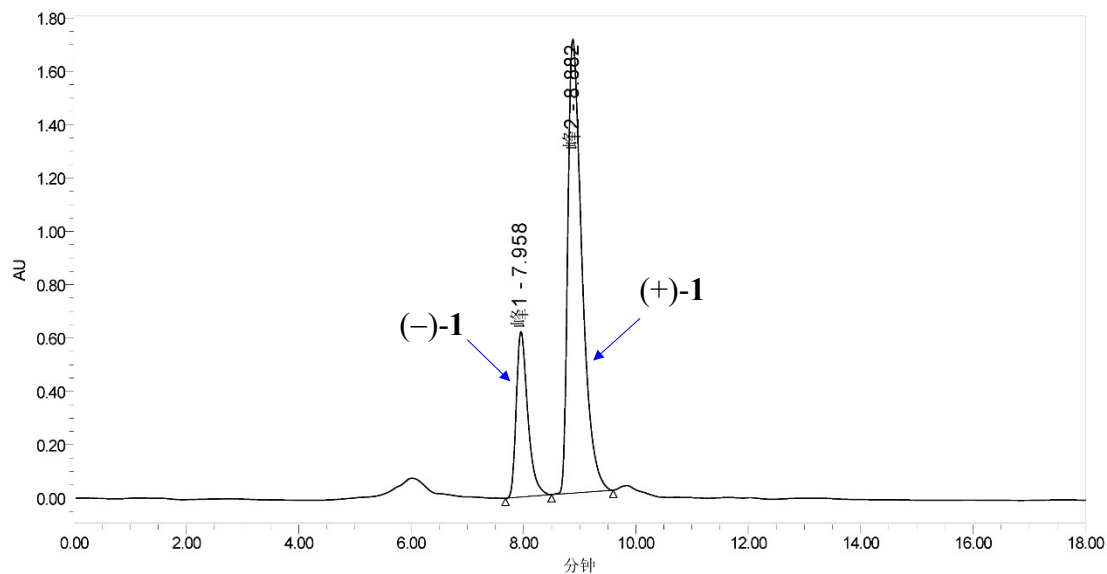

|   | 名称 | 保留时间<br>(分钟) | 面积<br>(微伏*秒) | % 面积  | 高度<br>(微伏) | % 高度  |
|---|----|--------------|--------------|-------|------------|-------|
| 1 | 峰1 | 7.958        | 8821112      | 22.84 | 621627     | 26.75 |
| 2 | 峰2 | 8.882        | 29806245     | 77.16 | 1701961    | 73.25 |

\*Lux<sup>®</sup> Amylose-1 (250 mm × 10 mm, S-5 μm) LC column (UV = 254 nm)

Mobile Phase: n-hexane/isopropanol 7:3, v/v, 3ml.min<sup>-1</sup>

(+)-**1**:(-)-**1** ≈ 3:1

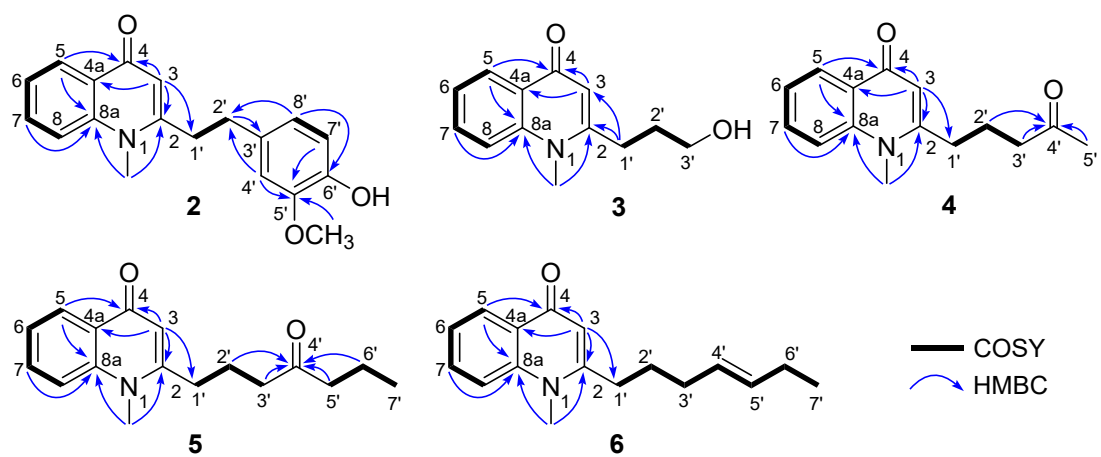

**Fig. S3** Key  $^1\text{H}$ - $^1\text{H}$  COSY and HMBC correlations of 2–6

**Fig. S4** Chiral HPLC separation of compound **7**

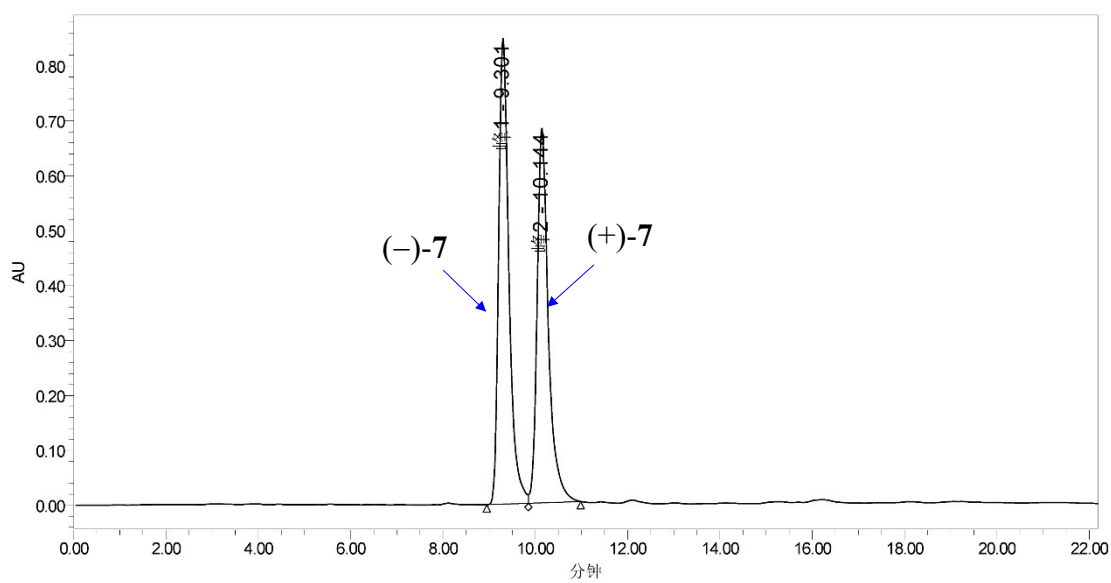

|   | 名称 | 保留时间<br>(分钟) | 面积<br>(微伏*秒) | % 面积  | 高度<br>(微伏) | % 高度  |
|---|----|--------------|--------------|-------|------------|-------|
| 1 | 峰1 | 9.301        | 13193340     | 53.41 | 847704     | 55.38 |
| 2 | 峰2 | 10.144       | 11507906     | 46.59 | 682928     | 44.62 |

\*Lux<sup>®</sup> Amylose-1 (250 mm × 10 mm, S-5 μm) LC column (UV = 254 nm)

Mobile Phase: n-hexane/isopropanol 85:15, v/v, 3ml.min<sup>-1</sup>

(+)-7:(-)-7 ≈ 1:1

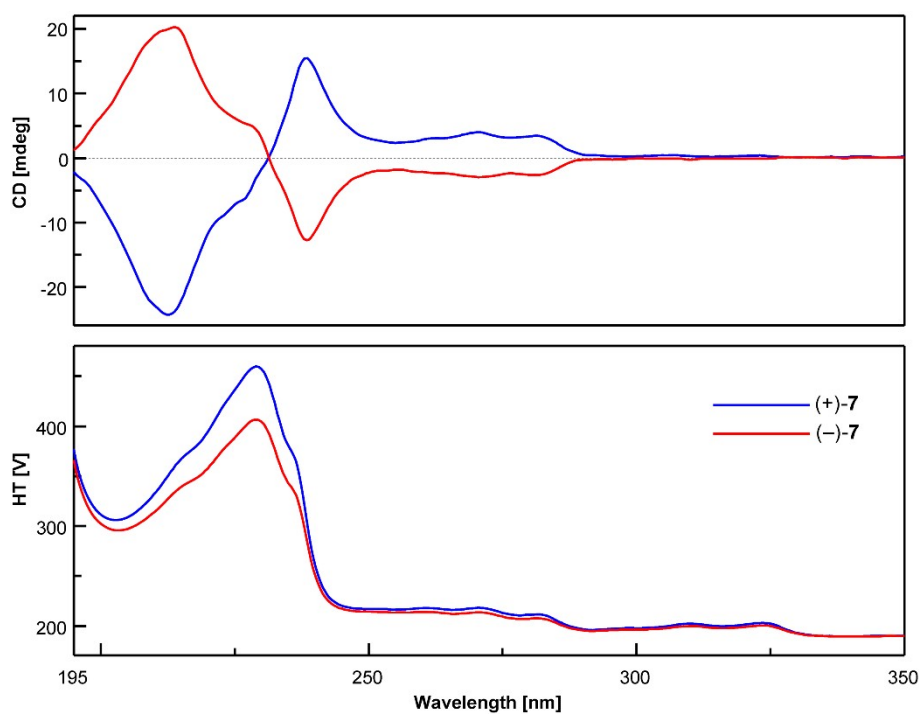

**Fig. S5** ECD spectra of two enantiomers (+)-7 and (-)-7



**Fig. S6** Chiral HPLC separation of compound **8**

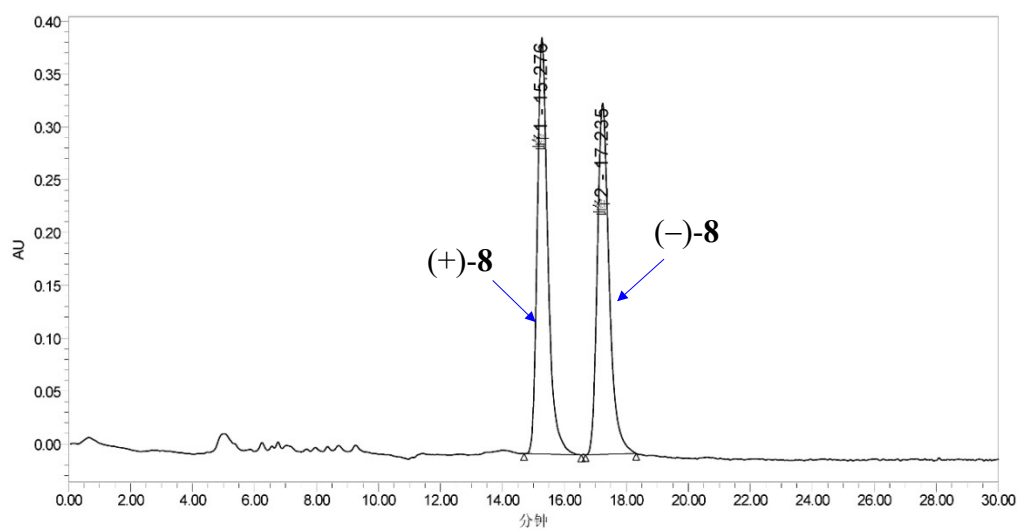

|   | 名称 | 保留时间<br>(分钟) | 面积<br>(微伏*秒) | % 面积  | 高度<br>(微伏) | % 高度  |
|---|----|--------------|--------------|-------|------------|-------|
| 1 | 峰1 | 15.276       | 9366728      | 51.44 | 394037     | 54.27 |
| 2 | 峰2 | 17.235       | 8841126      | 48.56 | 332092     | 45.73 |

\*Lux<sup>®</sup> Amylose-1 (250 mm × 10 mm, S-5 μm) LC column (UV = 254 nm)

Mobile Phase: n-hexane/isopropanol 7:3, v/v, 3ml.min<sup>-1</sup>

(+)-8:(-)-8 ≈ 1:1

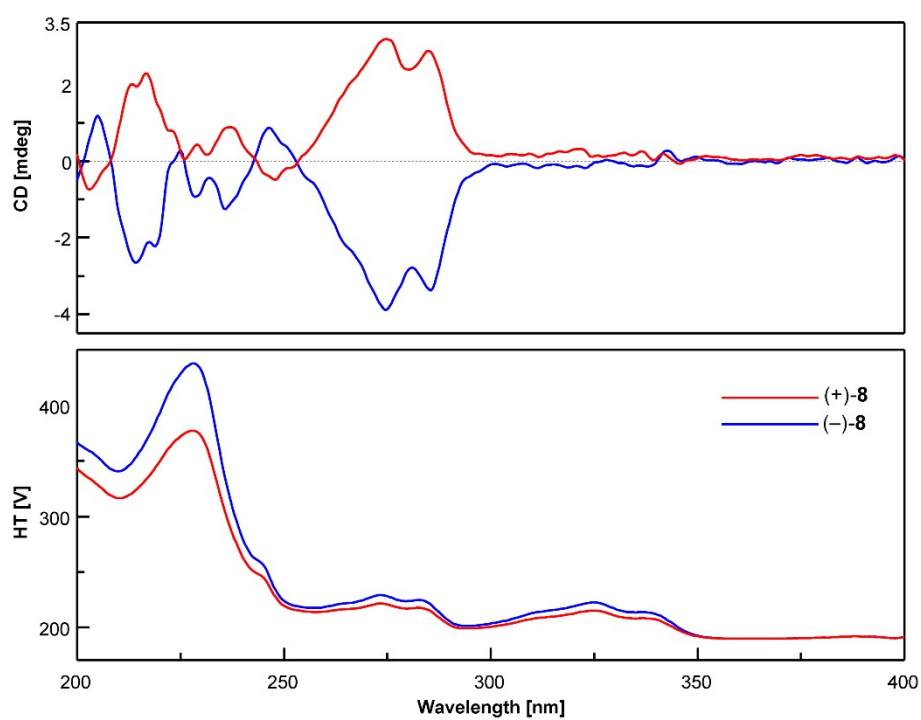

**Fig. S7** ECD spectra of two enantiomers (+)-**8** and (-)-**8**.

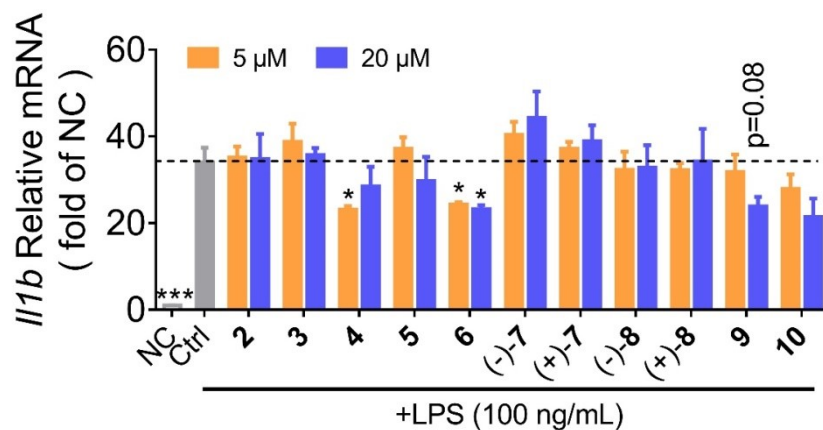

**Fig. S8.** The effect of Compound 2–10 on the gene expression level of IL-1 $\beta$  in RAW264.7 cells. The results are shown as the mean  $\pm$  s.e.m., n=3. Data were analyzed by student's T-test (two-tailed). \*P < 0.05 compared with the Ctrl group. The Ctrl (Control) group means RAW264.7 macrophages were treated with LPS (100 ng/mL) but without compounds.

**Table S1**  $^1\text{H}$  and  $^{13}\text{C}$  NMR data for **5** and **6** in  $\text{CDCl}_3$  ( $\delta$  in ppm and  $J$  in Hz)

| No.  | <b>5</b> <sup>a</sup>    |                     | <b>6</b> <sup>b</sup>    |                     |
|------|--------------------------|---------------------|--------------------------|---------------------|
|      | $\delta_{\text{H}}$      | $\delta_{\text{C}}$ | $\delta_{\text{H}}$      | $\delta_{\text{C}}$ |
| 2    |                          | 154.1               |                          | 154.7               |
| 3    | 6.20 s                   | 111.6               | 6.25 s                   | 111.5               |
| 4    |                          | 178.0               |                          | 178.0               |
| 4a   |                          | 126.7               |                          | 126.8               |
| 5    | 8.44 dd (7.6, 1.5)       | 126.8               | 8.46 dd (7.6, 1.7)       | 126.9               |
| 6    | 7.38 t (7.6)             | 123.6               | 7.38 t (7.6)             | 123.5               |
| 7    | 7.67 ddd (8.6, 7.6, 1.5) | 132.3               | 7.67 ddd (8.7, 7.6, 1.7) | 132.2               |
| 8    | 7.54 d (8.6)             | 115.6               | 7.51 (8.7)               | 115.4               |
| 8a   |                          | 142.2               |                          | 142.1               |
| 1'   | 2.73 m (2H)              | 34.4                | 2.72 m (2H)              | 34.1                |
| 2'   | 1.96 m (2H)              | 22.4                | 1.76 m (2H)              | 28.5                |
| 3'   | 2.58 t (6.3) (2H)        | 41.2                | 2.14 m (2H)              | 32.0                |
| 4'   |                          | 210.4               | 5.40 dt (14.5, 6.8)      | 127.5               |
| 5'   | 2.39 t (7.3) (2H)        | 45.1                | 5.54 dt (14.5, 6.4)      | 134.1               |
| 6'   | 1.59 m (2H)              | 17.4                | 2.02 m (2H)              | 25.7                |
| 7'   | 0.91 t (7.3)             | 13.9                | 0.98 t (7.5)             | 14.1                |
| N-Me | 3.84 s                   | 34.5                | 3.74 s                   | 34.3                |

<sup>a</sup> NMR data was recorded at 400 MHz ( $^1\text{H}$ ) and 125 MHz ( $^{13}\text{C}$ ). <sup>b</sup> NMR data was recorded at 600 MHz ( $^1\text{H}$ ) and 150 MHz ( $^{13}\text{C}$ ).

**Table S2** X-ray crystallographic data for compound **1**

---

|                                   |                                                                                                                                                         |
|-----------------------------------|---------------------------------------------------------------------------------------------------------------------------------------------------------|
| Empirical formula                 | $C_{16}H_{19}NO_5^a$                                                                                                                                    |
| Formula weight                    | 305.32                                                                                                                                                  |
| Temperature                       | 170.02 K                                                                                                                                                |
| Wavelength                        | 1.34139 Å                                                                                                                                               |
| Crystal system                    | Triclinic                                                                                                                                               |
| Space group                       | P-1                                                                                                                                                     |
| Unit cell dimensions              | $a = 8.5101(3)$ Å $\alpha = 77.6570(10)^\circ$ .<br>$b = 9.0807(3)$ Å $\beta = 83.0550(10)^\circ$ .<br>$c = 9.5903(3)$ Å $\gamma = 88.4020(10)^\circ$ . |
| Volume                            | 718.67(4) Å <sup>3</sup>                                                                                                                                |
| Z                                 | 2                                                                                                                                                       |
| Density (calculated)              | 1.411 Mg/m <sup>3</sup>                                                                                                                                 |
| Absorption coefficient            | 0.561 mm <sup>-1</sup>                                                                                                                                  |
| F(000)                            | 324                                                                                                                                                     |
| Crystal size                      | 0.12 x 0.1 x 0.08 mm <sup>3</sup>                                                                                                                       |
| Theta range for data collection   | 4.134 to 55.059°.                                                                                                                                       |
| Index ranges                      | -10 ≤ h ≤ 10, -11 ≤ k ≤ 11, -11 ≤ l ≤ 11                                                                                                                |
| Reflections collected             | 15698                                                                                                                                                   |
| Independent reflections           | 2729 [R(int) = 0.0540]                                                                                                                                  |
| Completeness to theta = 53.594°   | 99.5 %                                                                                                                                                  |
| Absorption correction             | Semi-empirical from equivalents                                                                                                                         |
| Max. and min. transmission        | 0.7508 and 0.5779                                                                                                                                       |
| Refinement method                 | Full-matrix least-squares on F <sup>2</sup>                                                                                                             |
| Data / restraints / parameters    | 2729 / 0 / 207                                                                                                                                          |
| Goodness-of-fit on F <sup>2</sup> | 1.046                                                                                                                                                   |
| Final R indices [I > 2σ(I)]       | R1 = 0.0391, wR2 = 0.1024                                                                                                                               |
| R indices (all data)              | R1 = 0.0425, wR2 = 0.1055                                                                                                                               |
| Extinction coefficient            | n/a                                                                                                                                                     |
| Largest diff. peak and hole       | 0.253 and -0.251 e.Å <sup>-3</sup>                                                                                                                      |
| CCDC number                       | 2160133                                                                                                                                                 |

---

<sup>a</sup> Crystals of compound **1** were obtained from MeOH.

**Table S3** X-ray crystallographic data for compound (-)-**1**

---

|                                   |                                                                                                                                |
|-----------------------------------|--------------------------------------------------------------------------------------------------------------------------------|
| Empirical formula                 | $C_{15}H_{17}NO_5^a$                                                                                                           |
| Formula weight                    | 291.29                                                                                                                         |
| Temperature                       | 170.04 K                                                                                                                       |
| Wavelength                        | 1.34139 Å                                                                                                                      |
| Crystal system                    | Monoclinic                                                                                                                     |
| Space group                       | P 1 21 1                                                                                                                       |
| Unit cell dimensions              | $a = 9.7252(4)$ Å $\alpha = 90^\circ$<br>$b = 7.2357(3)$ Å $\beta = 98.737(2)^\circ$<br>$c = 10.0005(4)$ Å $\gamma = 90^\circ$ |
| Volume                            | $695.56(5)$ Å <sup>3</sup>                                                                                                     |
| Z                                 | 2                                                                                                                              |
| Density (calculated)              | 1.391 Mg/m <sup>3</sup>                                                                                                        |
| Absorption coefficient            | 0.563 mm <sup>-1</sup>                                                                                                         |
| F(000)                            | 308                                                                                                                            |
| Crystal size                      | 0.12 x 0.08 x 0.06 mm <sup>3</sup>                                                                                             |
| Theta range for data collection   | 5.996 to 55.068°.                                                                                                              |
| Index ranges                      | -11 ≤ h ≤ 11, -8 ≤ k ≤ 8, -12 ≤ l ≤ 12                                                                                         |
| Reflections collected             | 9299                                                                                                                           |
| Independent reflections           | 2585 [R(int) = 0.0640]                                                                                                         |
| Completeness to theta = 53.594°   | 99.0 %                                                                                                                         |
| Absorption correction             | Semi-empirical from equivalents                                                                                                |
| Max. and min. transmission        | 0.7508 and 0.5615                                                                                                              |
| Refinement method                 | Full-matrix least-squares on F <sup>2</sup>                                                                                    |
| Data / restraints / parameters    | 2585 / 1 / 201                                                                                                                 |
| Goodness-of-fit on F <sup>2</sup> | 1.051                                                                                                                          |
| Final R indices [I > 2σ(I)]       | R1 = 0.0351, wR2 = 0.0812                                                                                                      |
| R indices (all data)              | R1 = 0.0401, wR2 = 0.0869                                                                                                      |
| Absolute structure parameter      | 0.11(16)                                                                                                                       |
| Extinction coefficient            | n/a                                                                                                                            |
| Largest diff. peak and hole       | 0.159 and -0.178 e.Å <sup>-3</sup>                                                                                             |
| CCDC number                       | 2160134                                                                                                                        |

---

<sup>a</sup> Crystals of compound (-)-**1** were obtained from MeOH.

---

**Table S4** X-ray crystallographic data for compound (+)-7

---

|                                   |                                                                                                            |
|-----------------------------------|------------------------------------------------------------------------------------------------------------|
| Empirical formula                 | C <sub>15</sub> H <sub>17</sub> NO <sub>4</sub>                                                            |
| Formula weight                    | 275.29                                                                                                     |
| Temperature                       | 169.99 K                                                                                                   |
| Wavelength                        | 1.34139 Å                                                                                                  |
| Crystal system                    | Monoclinic                                                                                                 |
| Space group                       | P 1 21 1                                                                                                   |
| Unit cell dimensions              | a = 8.5948(3) Å      α = 90°.<br>b = 8.5216(3) Å      β = 100.0350(10)°.<br>c = 18.7212(6) Å      γ = 90°. |
| Volume                            | 1350.19(8) Å <sup>3</sup>                                                                                  |
| Z                                 | 4                                                                                                          |
| Density (calculated)              | 1.354 Mg/m <sup>3</sup>                                                                                    |
| Absorption coefficient            | 0.522 mm <sup>-1</sup>                                                                                     |
| F(000)                            | 584                                                                                                        |
| Crystal size                      | 0.12 x 0.1 x 0.08 mm <sup>3</sup>                                                                          |
| Theta range for data collection   | 4.545 to 54.944°.                                                                                          |
| Index ranges                      | -10 ≤ h ≤ 10, -10 ≤ k ≤ 10, -22 ≤ l ≤ 22                                                                   |
| Reflections collected             | 14913                                                                                                      |
| Independent reflections           | 5038 [R(int) = 0.0437]                                                                                     |
| Completeness to theta = 53.594°   | 98.7 %                                                                                                     |
| Absorption correction             | Semi-empirical from equivalents                                                                            |
| Max. and min. transmission        | 0.7508 and 0.6254                                                                                          |
| Refinement method                 | Full-matrix least-squares on F <sup>2</sup>                                                                |
| Data / restraints / parameters    | 5038 / 1 / 371                                                                                             |
| Goodness-of-fit on F <sup>2</sup> | 1.065                                                                                                      |
| Final R indices [I > 2σ(I)]       | R1 = 0.0331, wR2 = 0.0843                                                                                  |
| R indices (all data)              | R1 = 0.0361, wR2 = 0.0874                                                                                  |
| Absolute structure parameter      | 0.02(9)                                                                                                    |
| Extinction coefficient            | n/a                                                                                                        |
| Largest diff. peak and hole       | 0.192 and -0.173 e.Å <sup>-3</sup>                                                                         |
| CCDC number                       | 2160135                                                                                                    |

---

<sup>a</sup> Crystals of compound (+)-7 were obtained from MeOH.

---

**Table S5** Primer sequences used in RT-PCR analysis

| <b>Genes</b>                    | <b>Forward primer</b>   | <b>Reverse primer</b>  |
|---------------------------------|-------------------------|------------------------|
| <i><math>\beta</math>-actin</i> | TGGTACCACAGGCATTGTGAT   | TGATGTCACGCACGATTTCCCT |
| <i>Il1b</i>                     | GCAACTG TTCCTGAACTCAACT | ATCTTTTGGGGTCCGTCAACT  |
| <i>Il6</i>                      | TAGTCCTTCCTACCCCAATTTC  | TTGGTCCTTAGCCACTCCTTC  |



Fig. S9 <sup>1</sup>H NMR spectrum of **1** in CDCl<sub>3</sub>

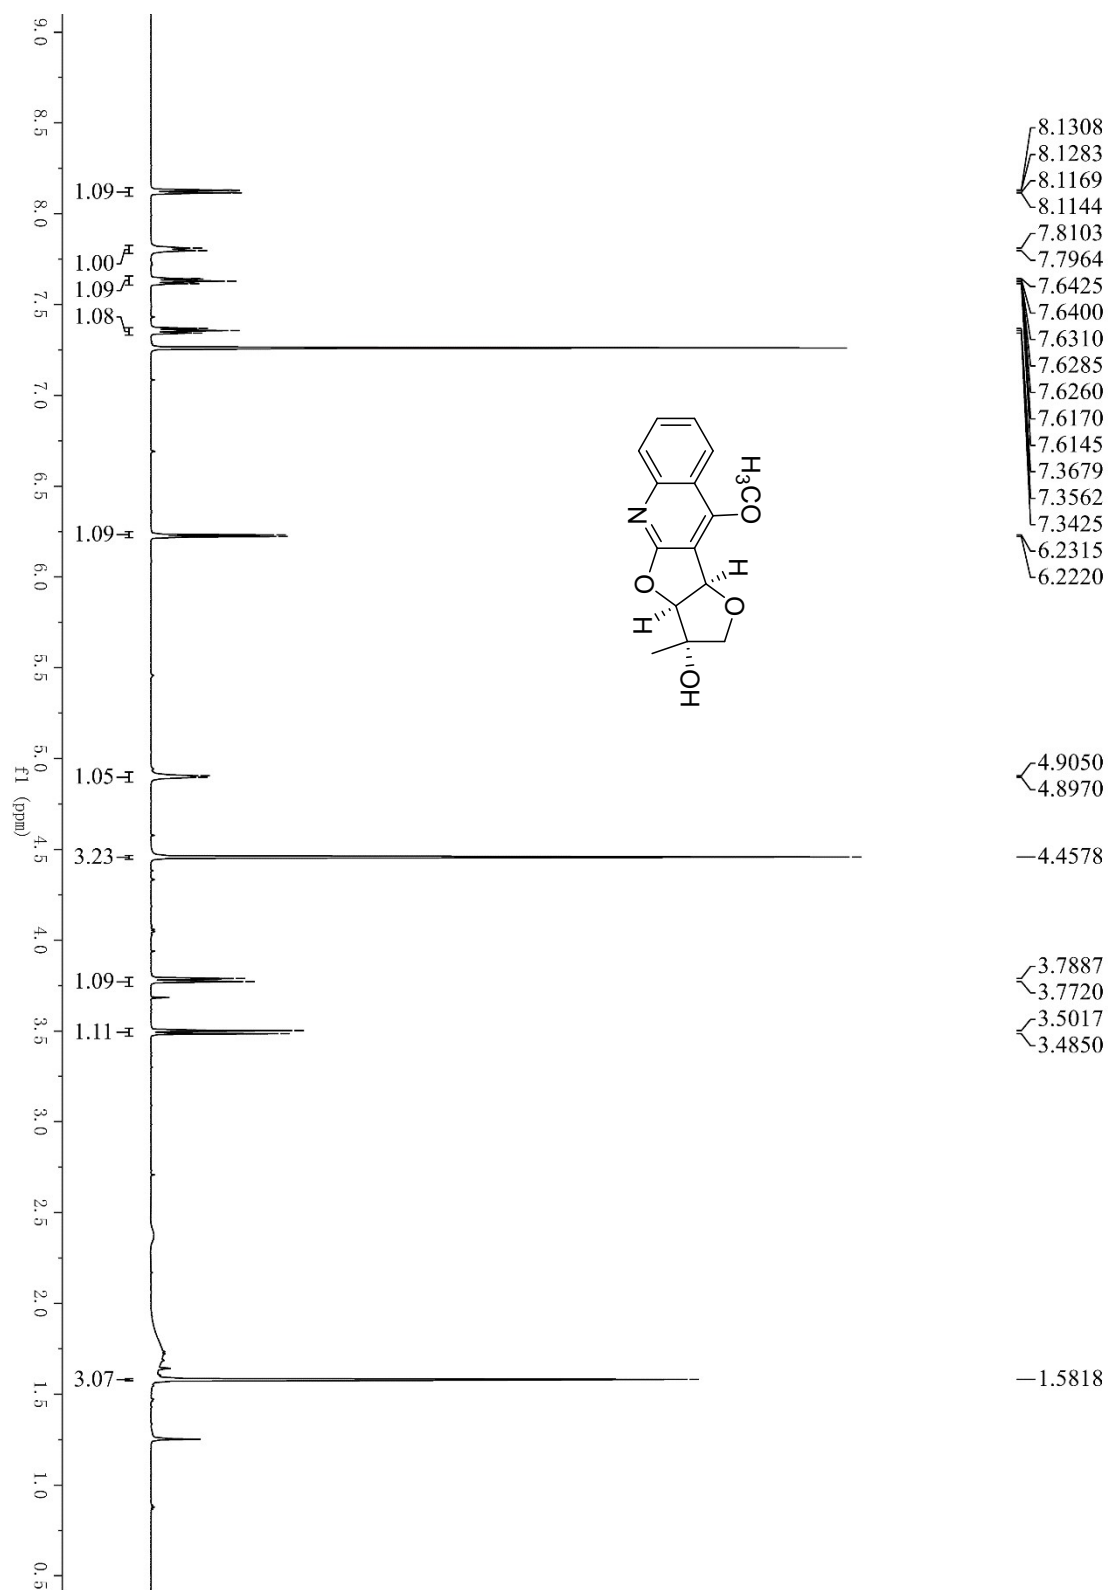

Fig. S10  $^{13}\text{C}$  NMR spectrum of **1** in  $\text{CDCl}_3$

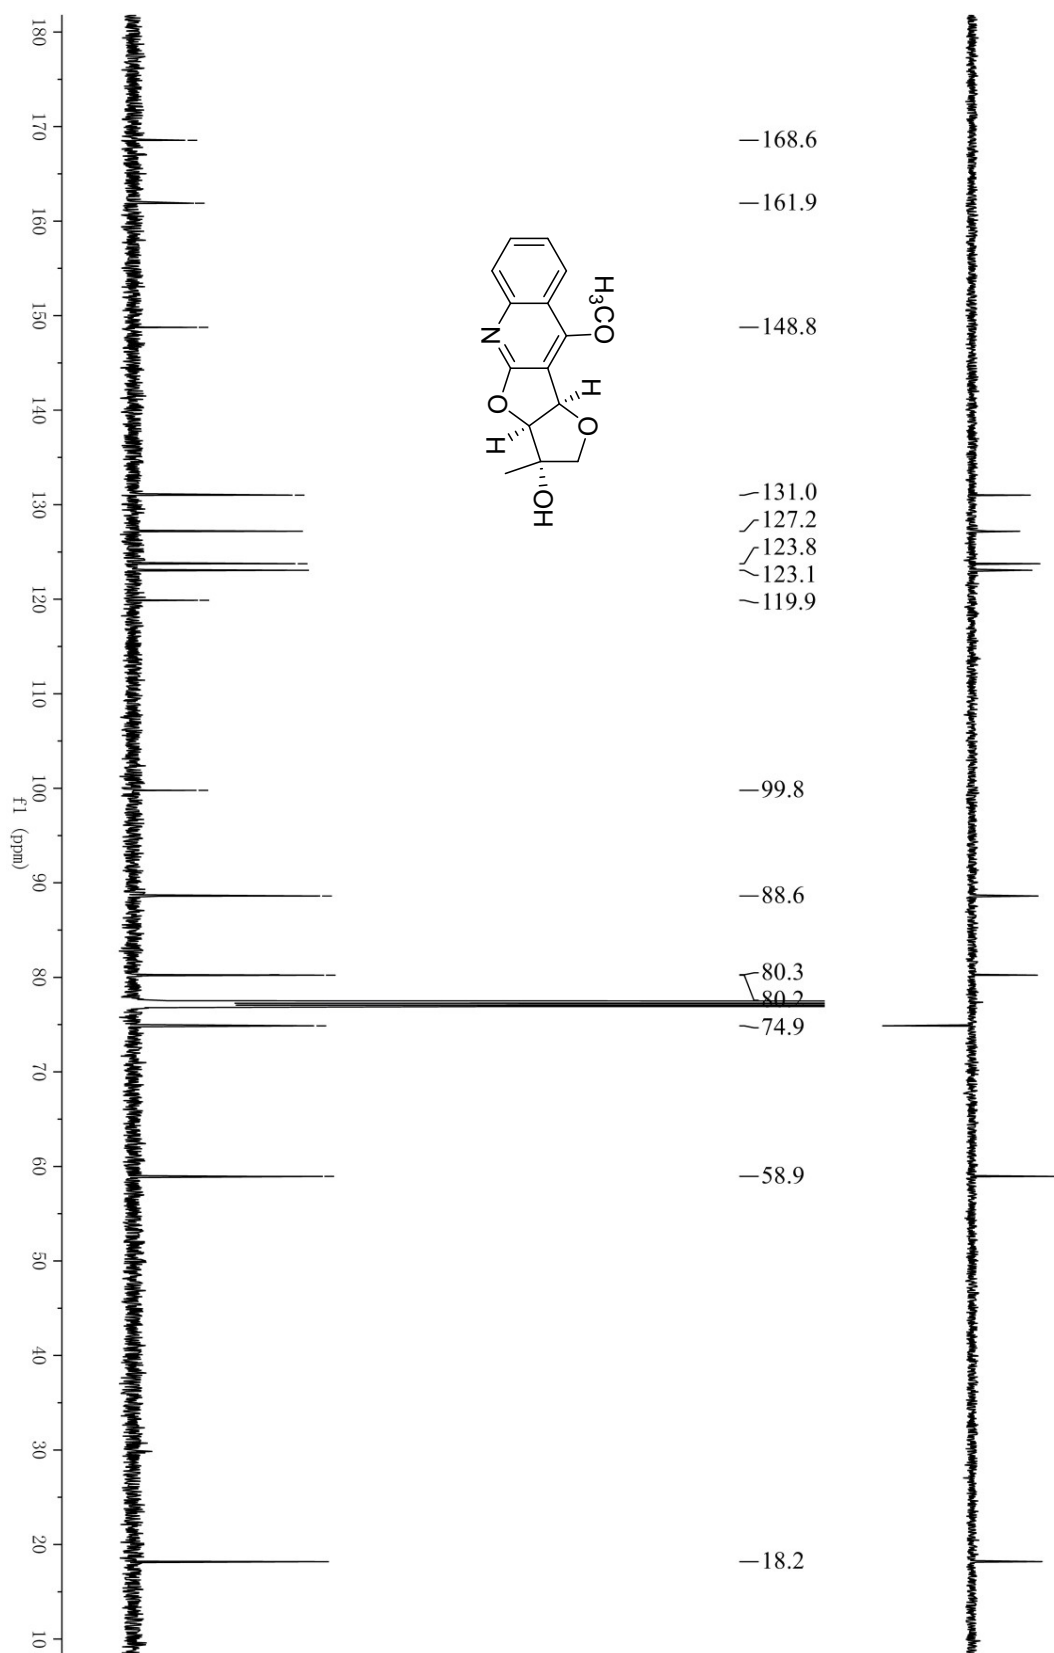

**Fig. S11** HSQC spectrum of **1**

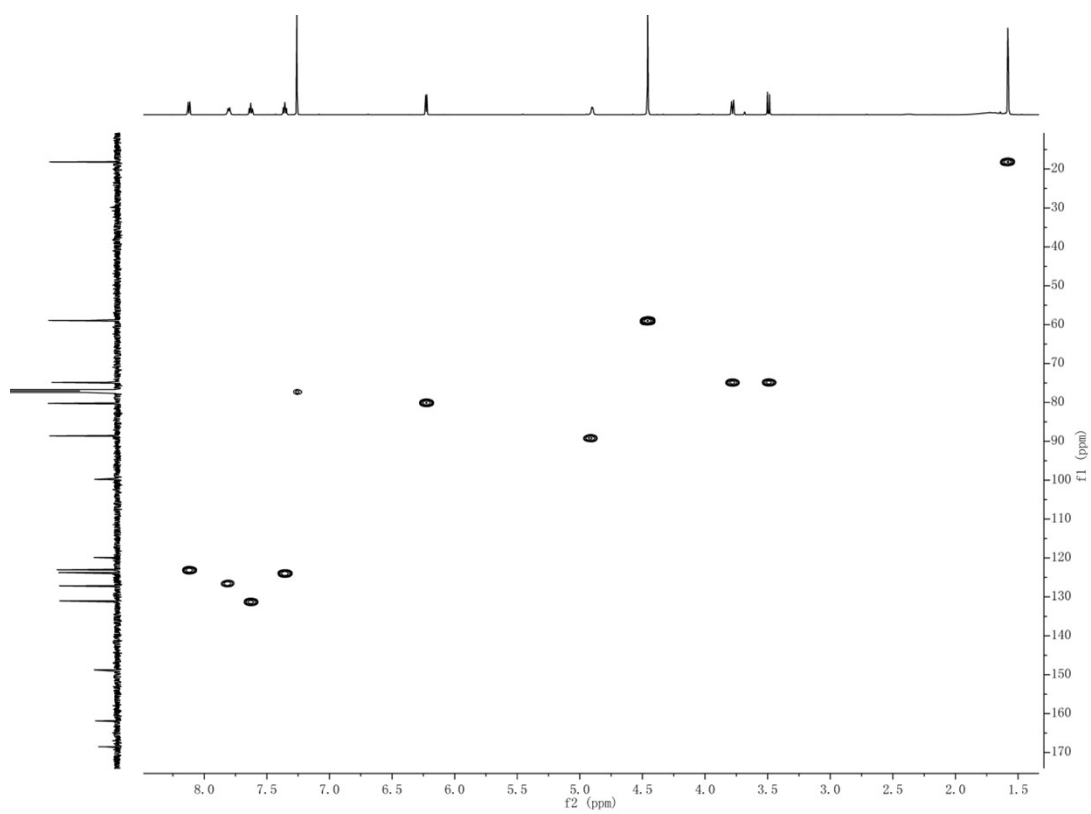

**Fig. S12** HMBC spectrum of **1**

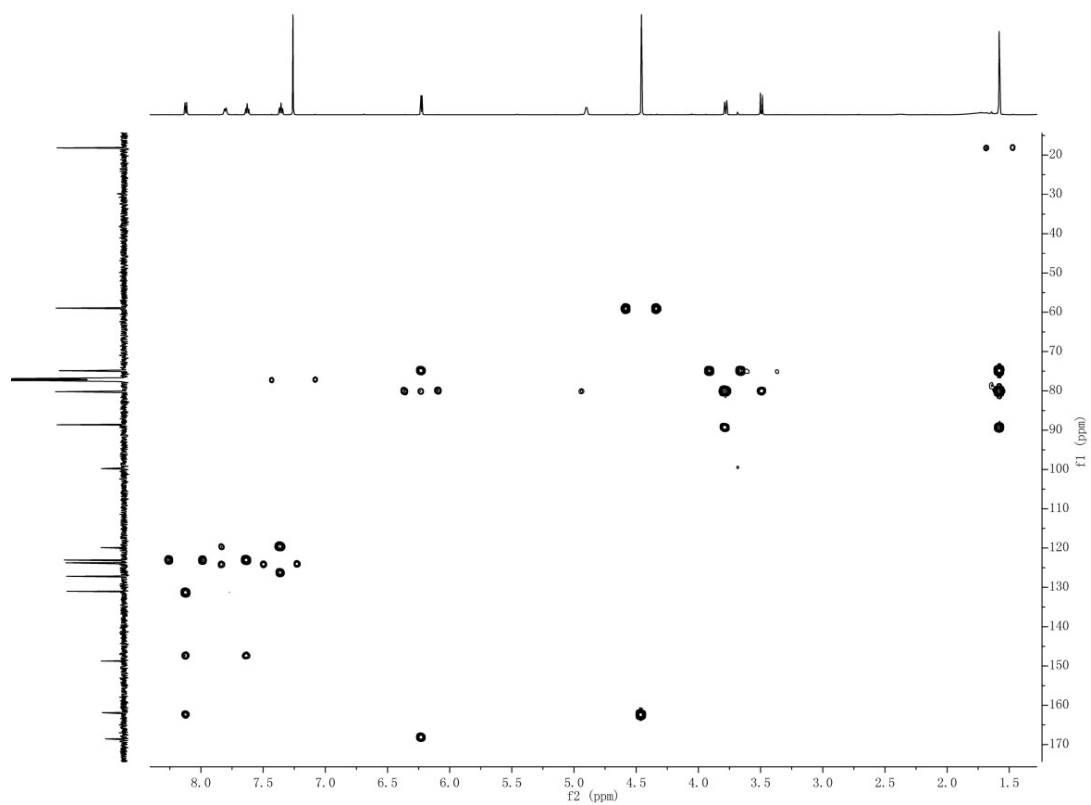

**Fig. S13** COSY spectrum of **1**

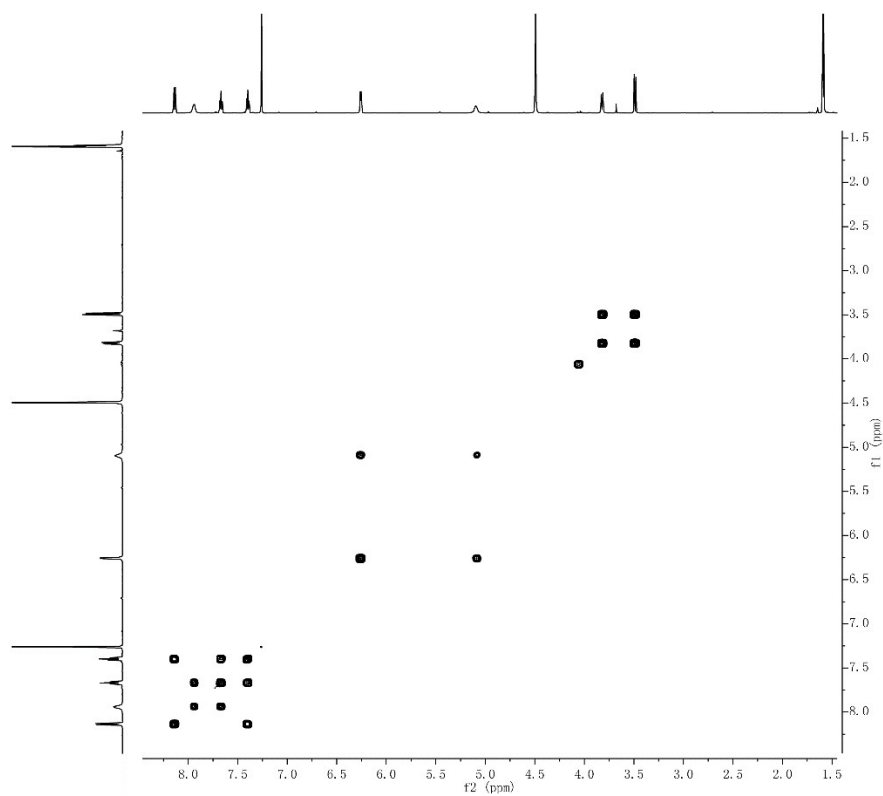

**Fig. S14** ROESY spectrum of **1**

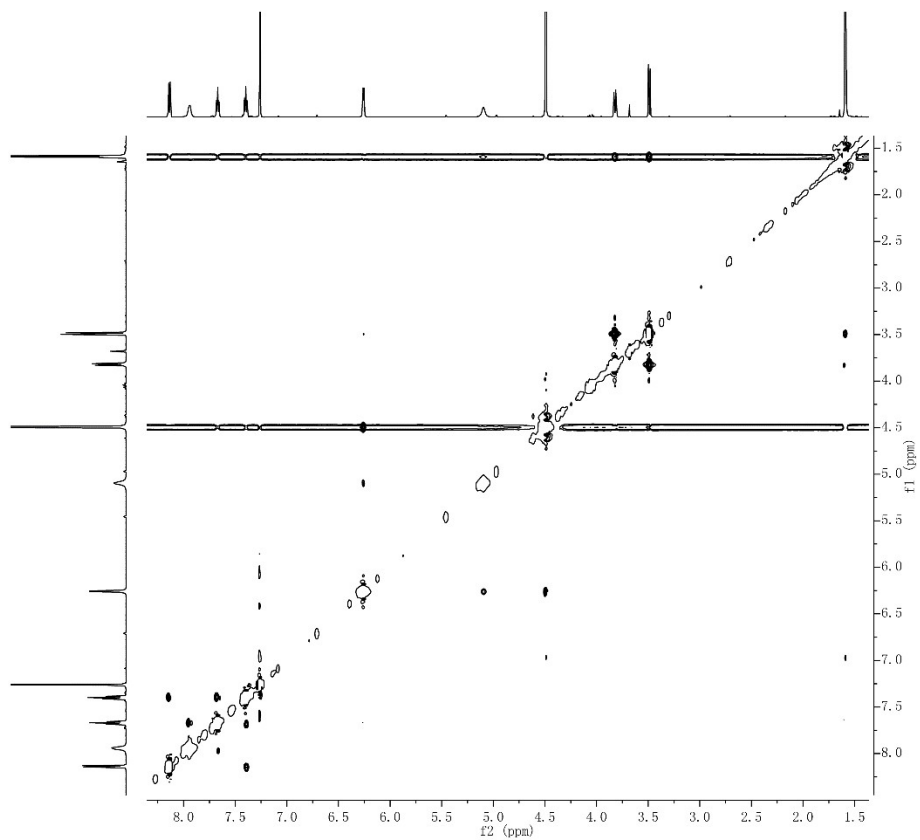

**Fig. S15** ESI-MS spectrum of **1**

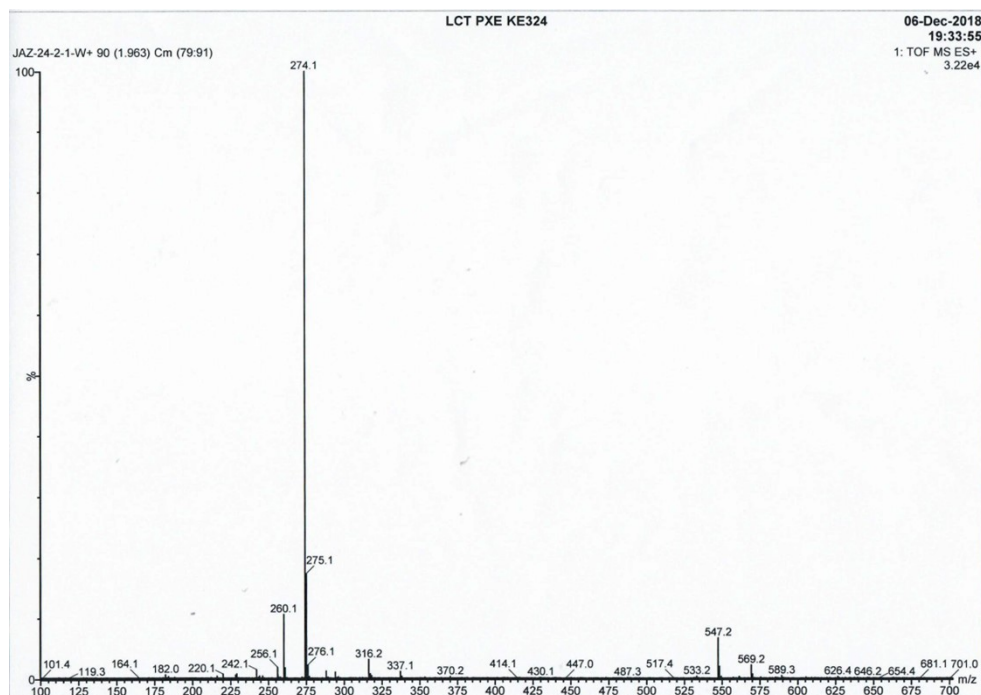

**Fig. S16** HRESI-MS spectrum of **1**

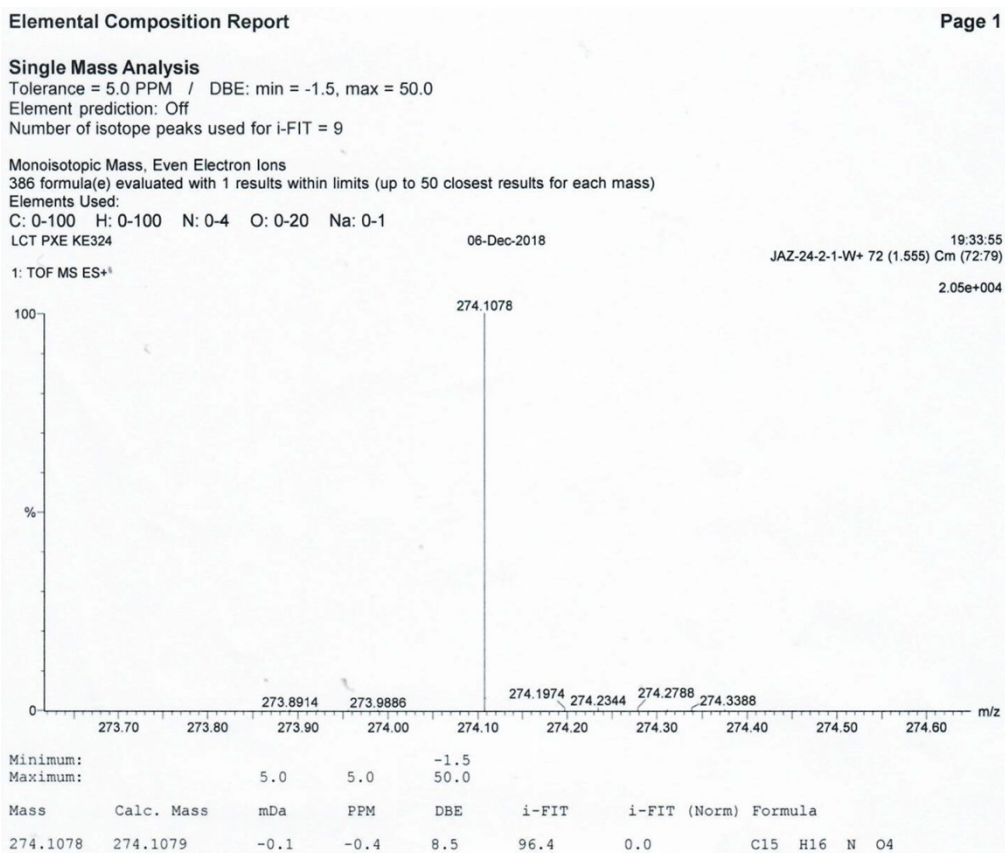

**Fig. S17** IR spectrum of **1**

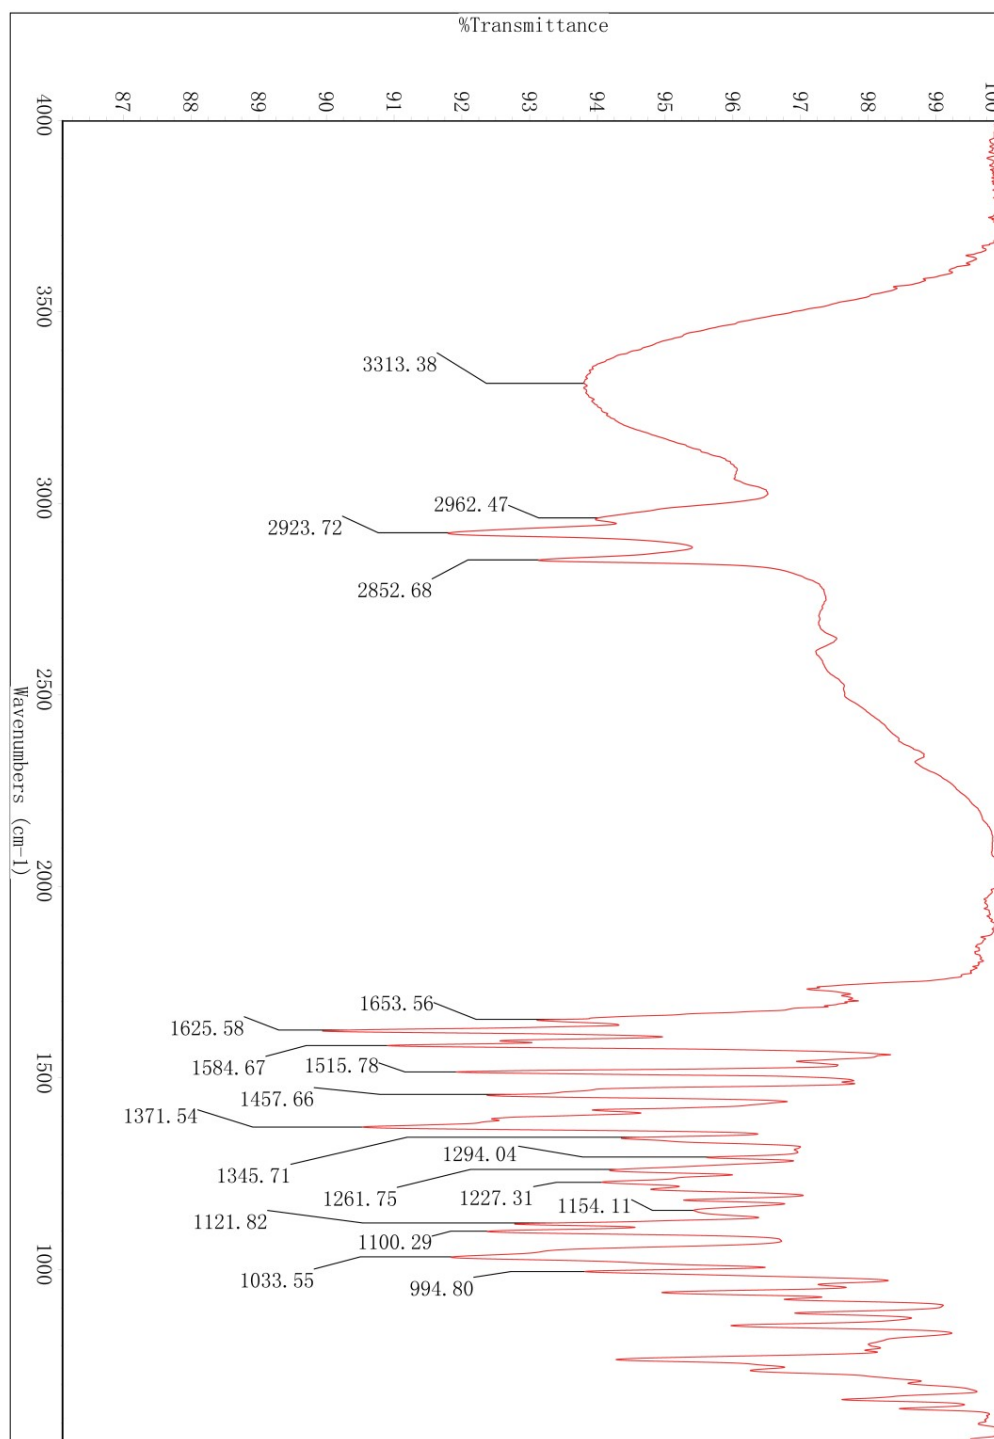

Fig. S18 <sup>1</sup>H NMR spectrum of **2** in CDCl<sub>3</sub>

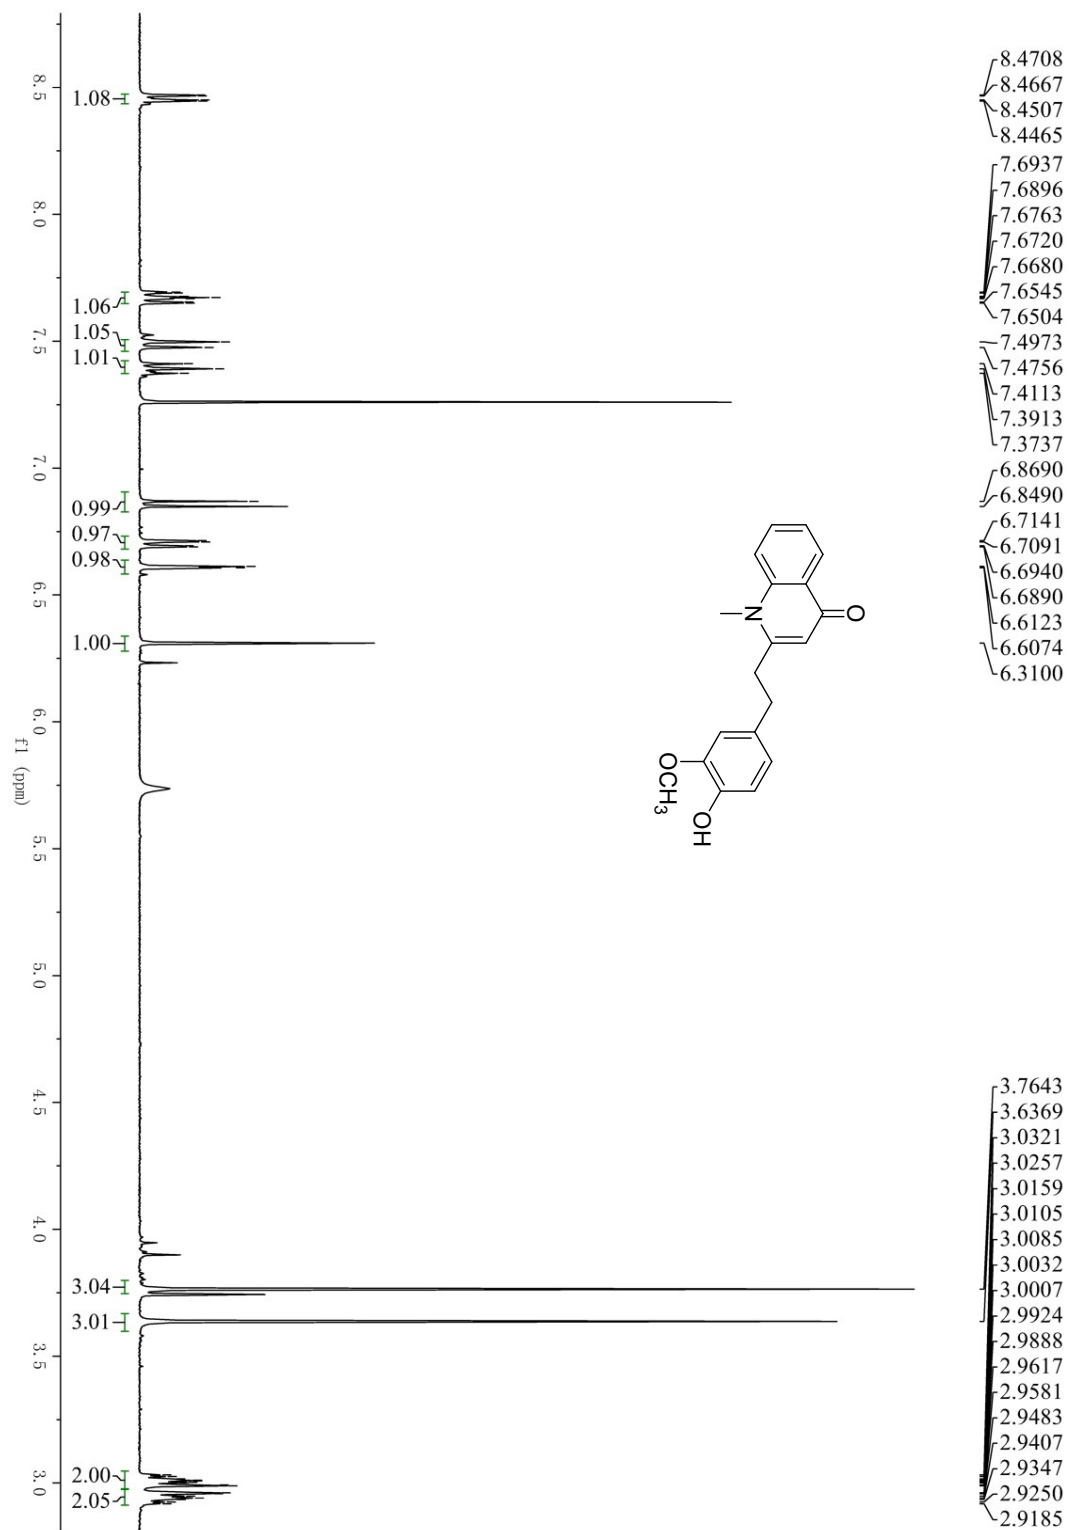

Fig. S19  $^{13}\text{C}$  NMR spectrum of **2** in  $\text{CDCl}_3$

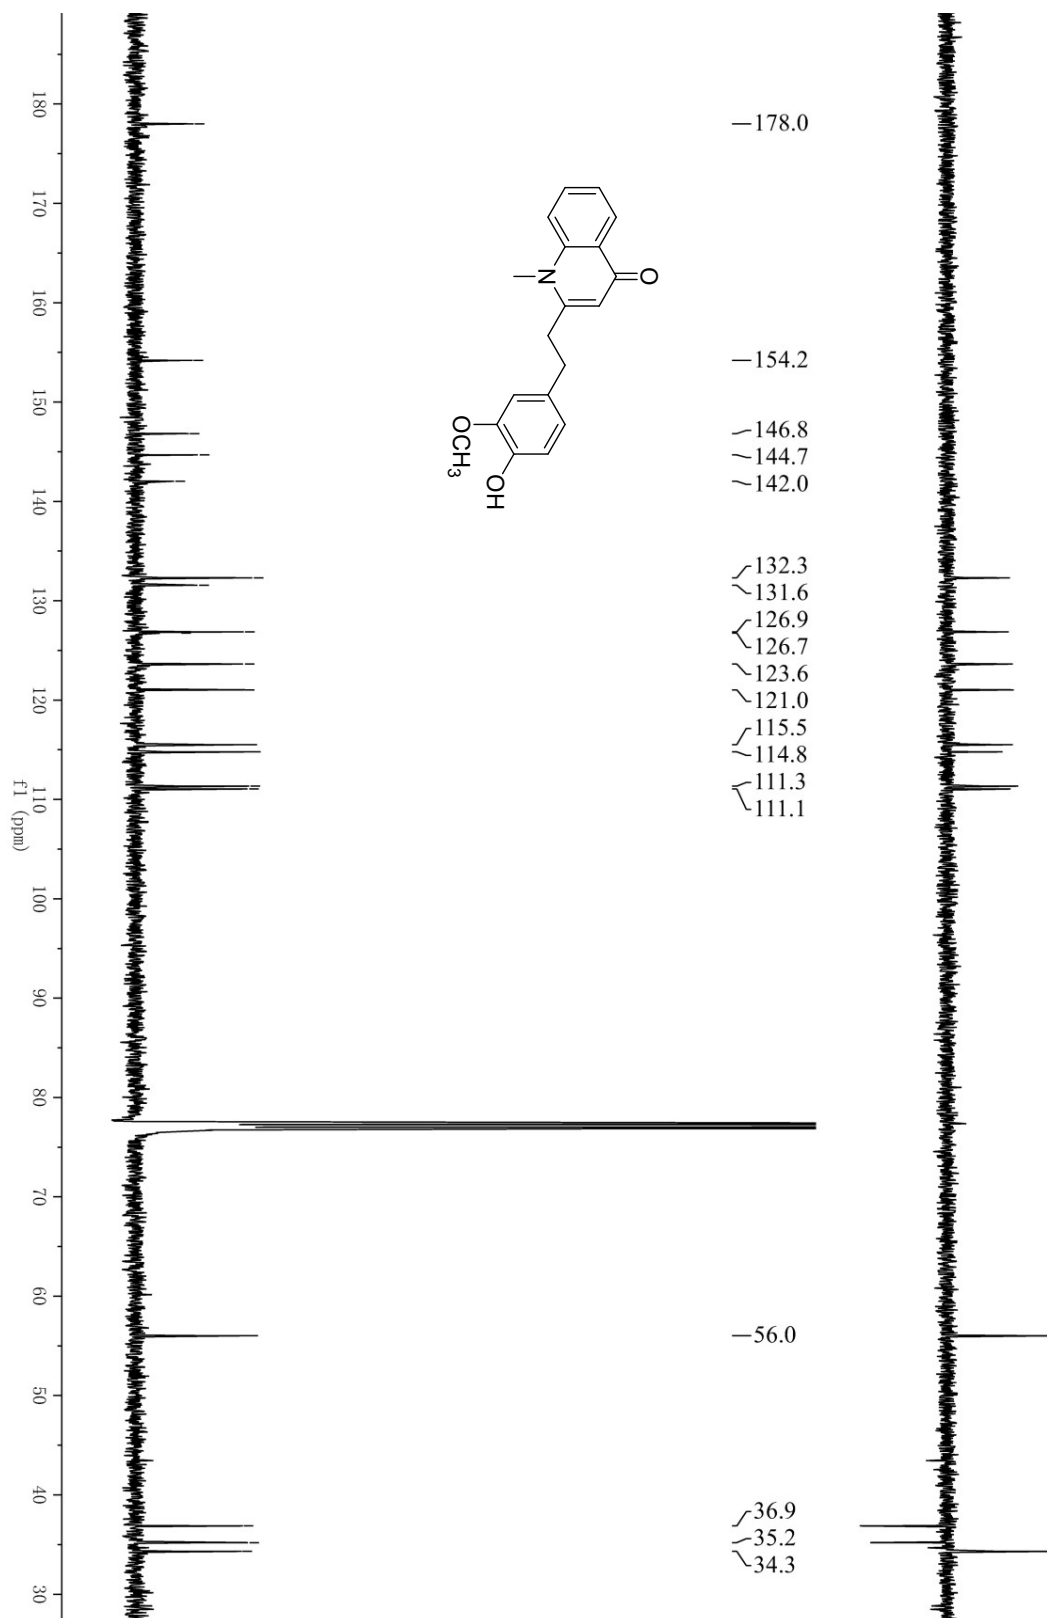



Fig. S20 HSQC spectrum of 2

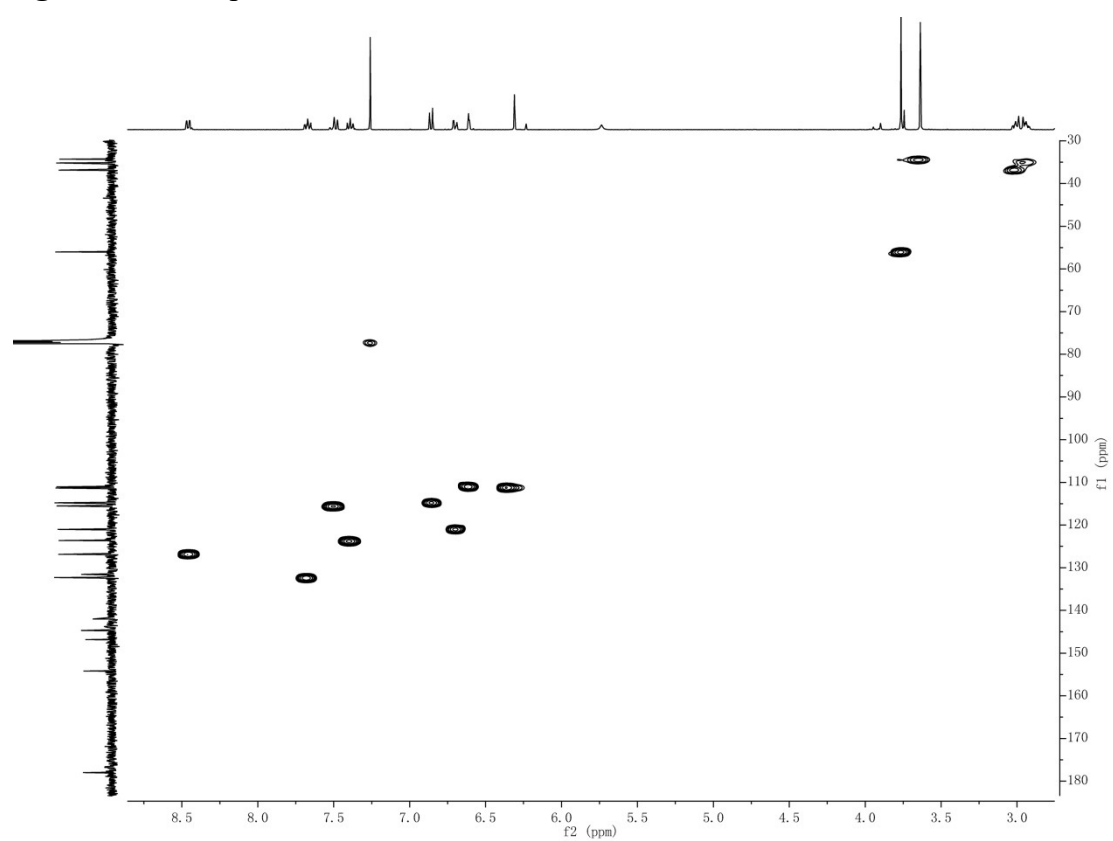

Fig. S21 HMBC spectrum of 2

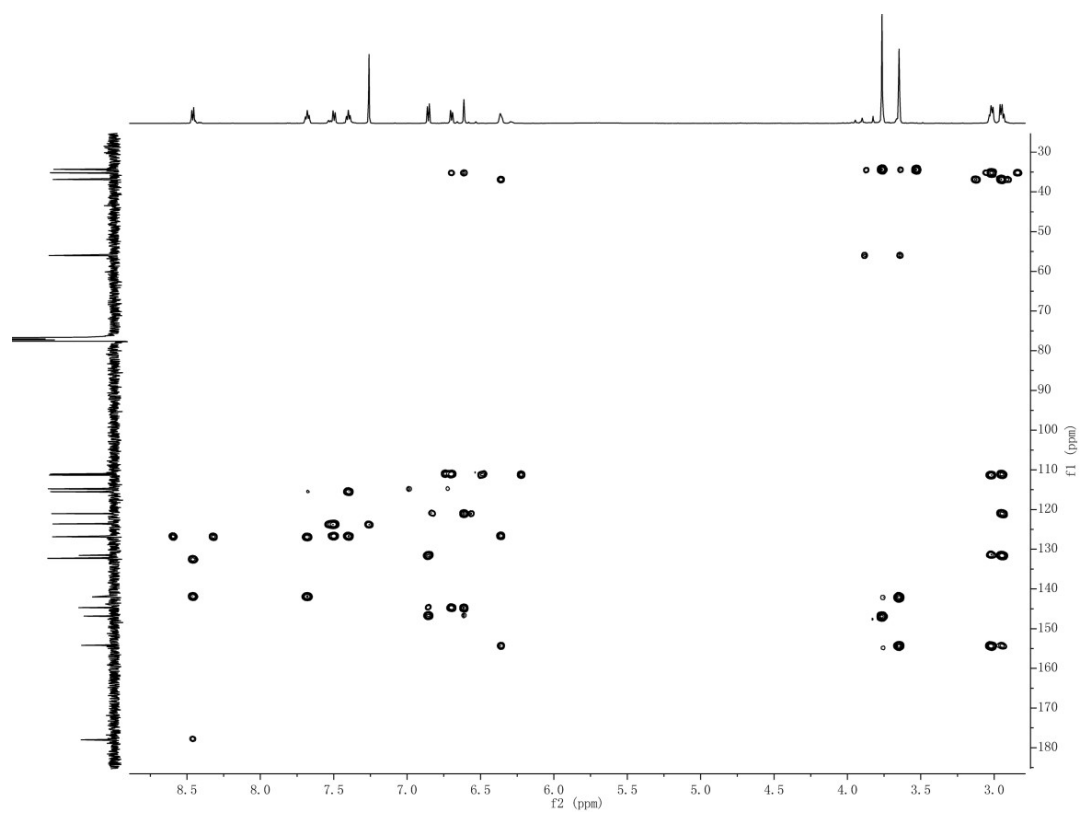

Fig. S22 COSY spectrum of 2

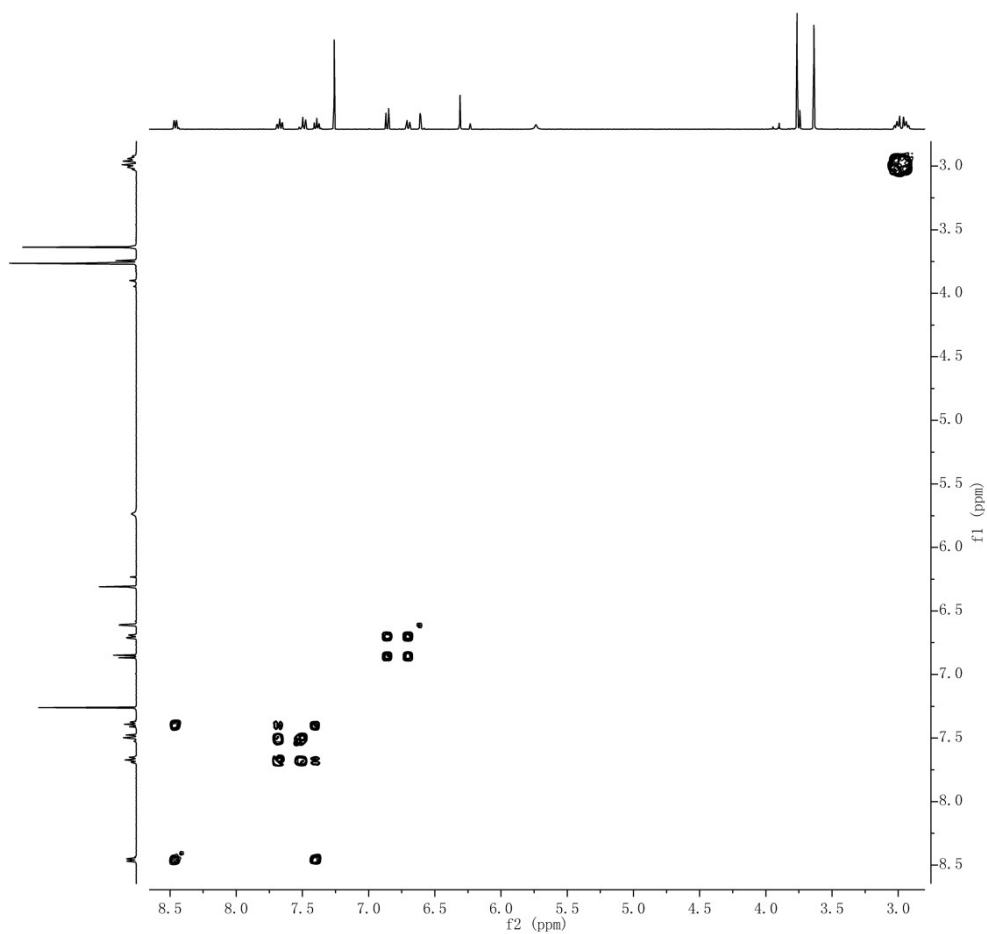

Fig. S23 ESI-MS spectrum of 2

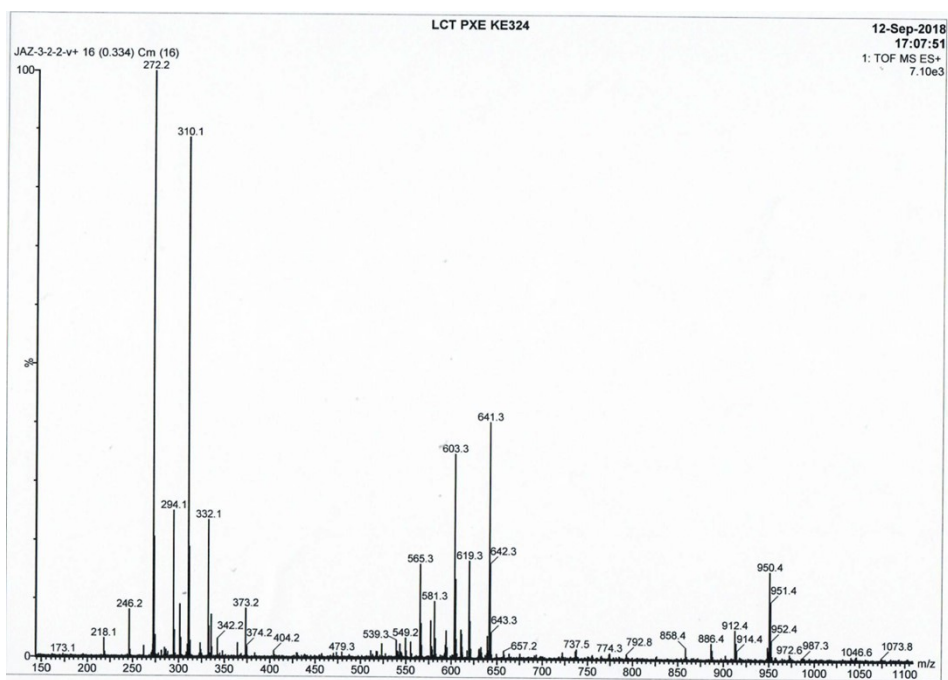

**Fig. S24** HRESI-MS spectrum of **2**

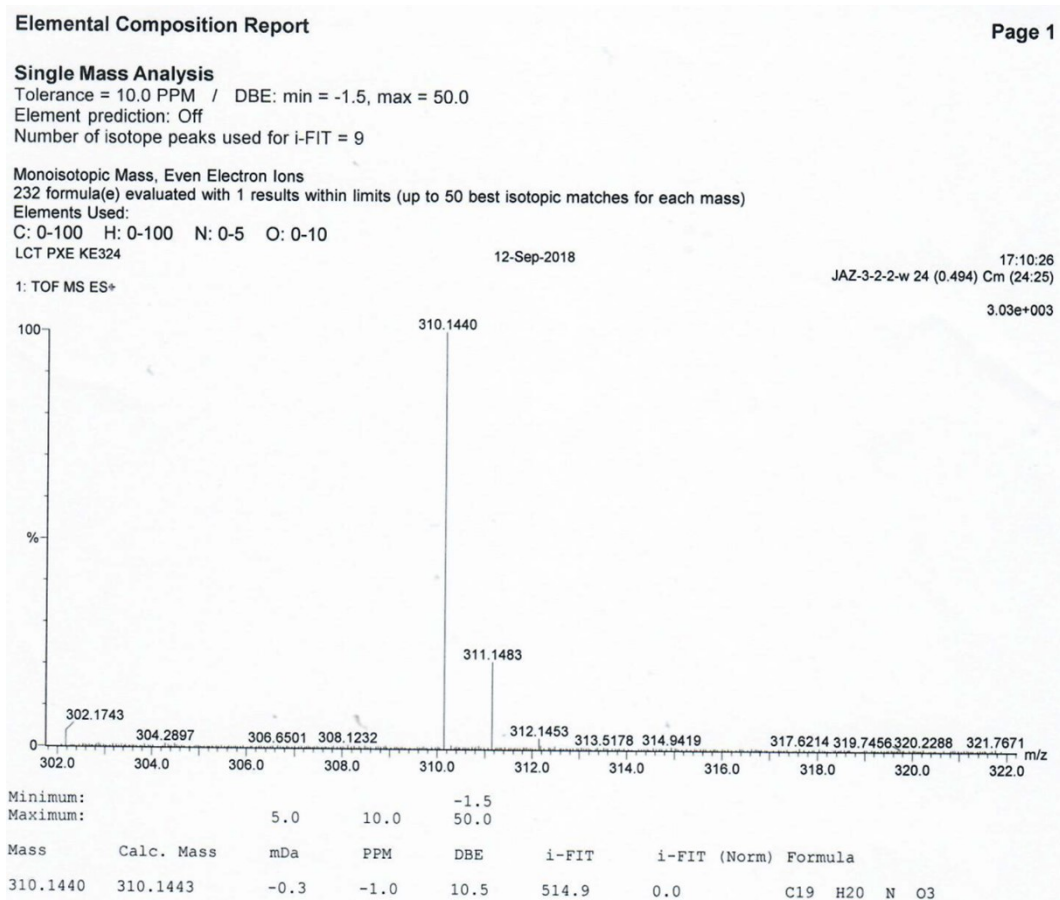

**Fig. S25** IR spectrum of **2**

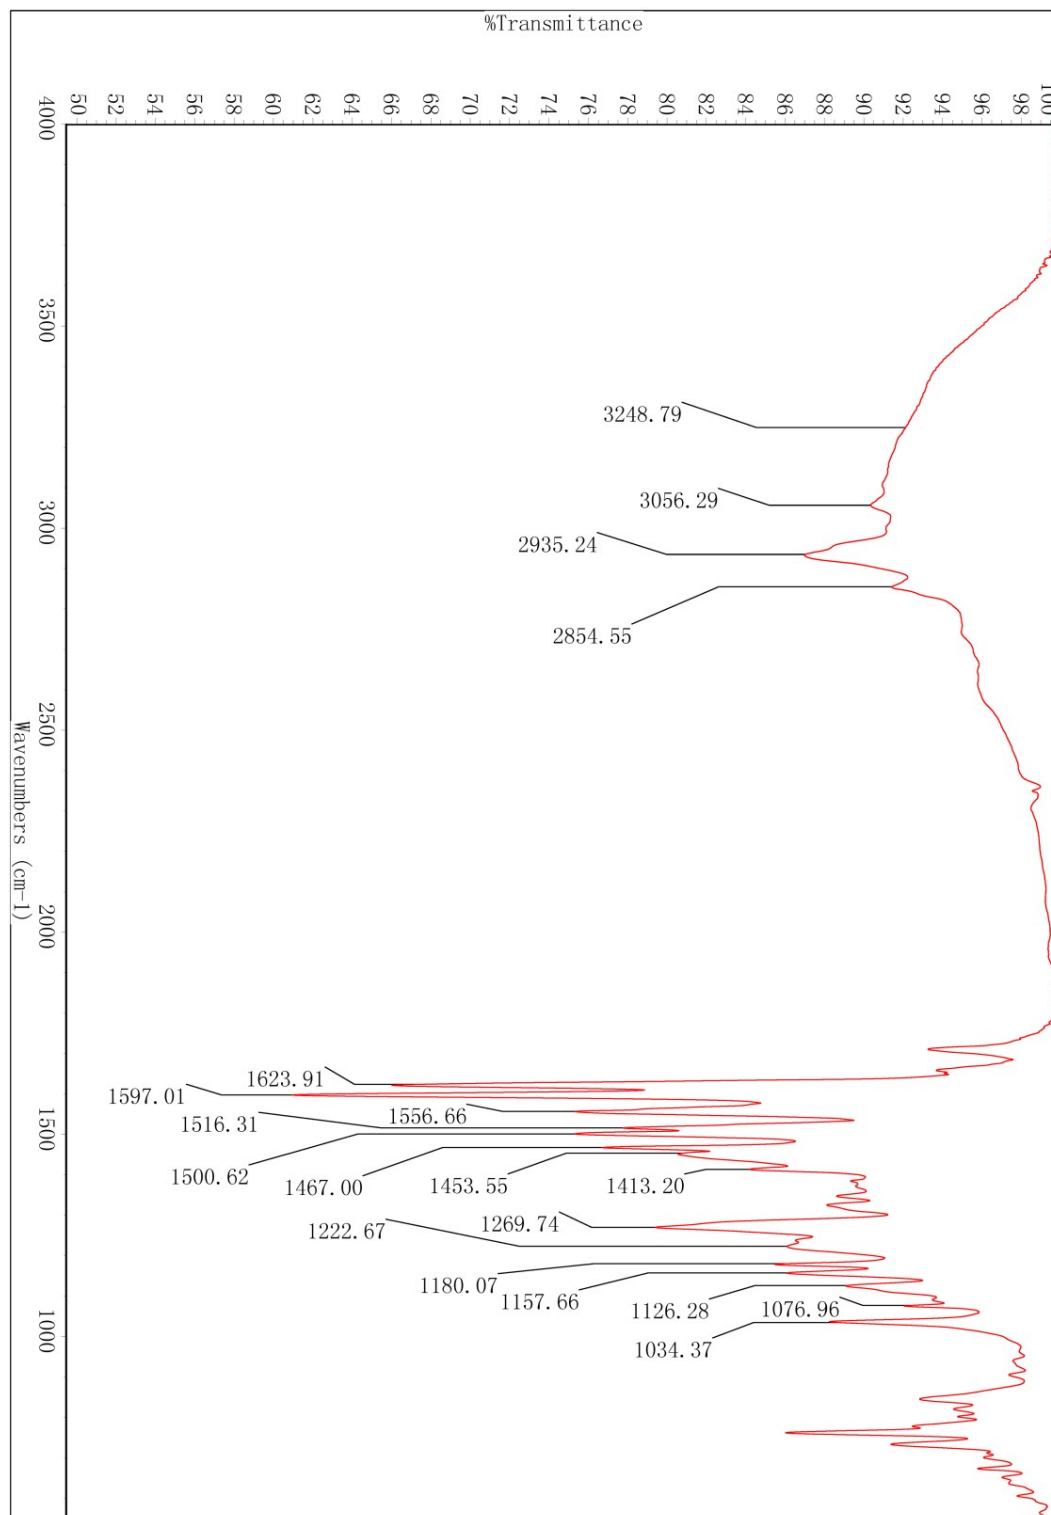

Fig. S26 <sup>1</sup>H NMR spectrum of **3** in CDCl<sub>3</sub>

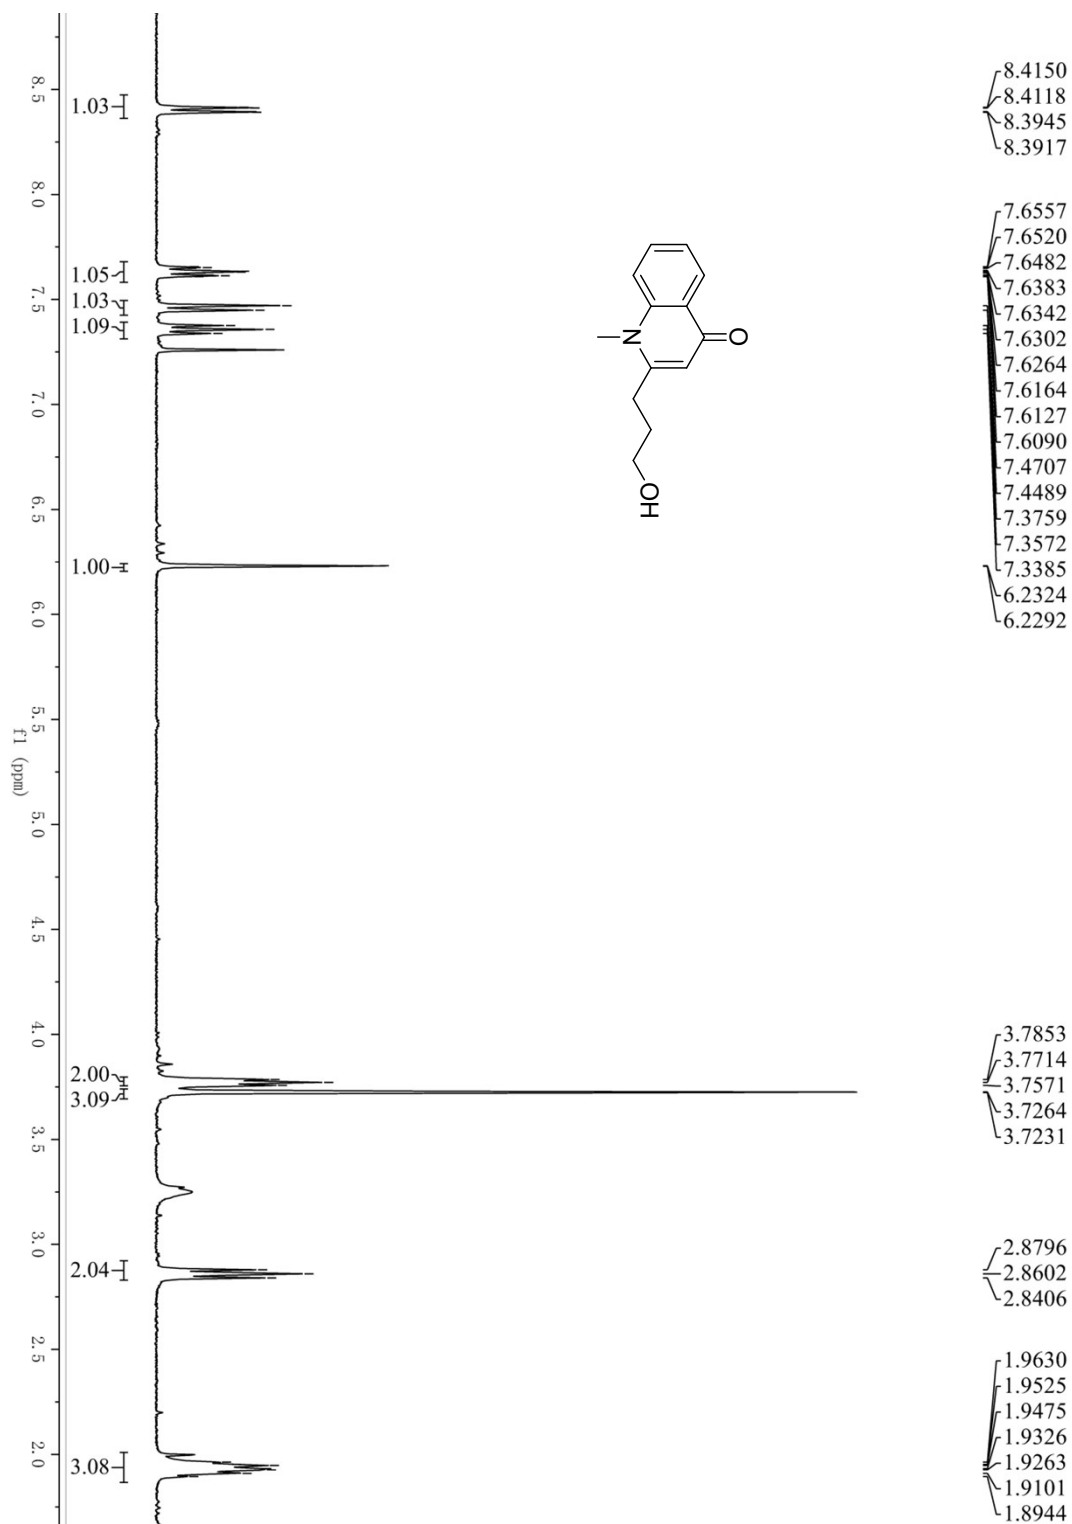

Fig. S27  $^{13}\text{C}$  NMR spectrum of **3** in  $\text{CDCl}_3$

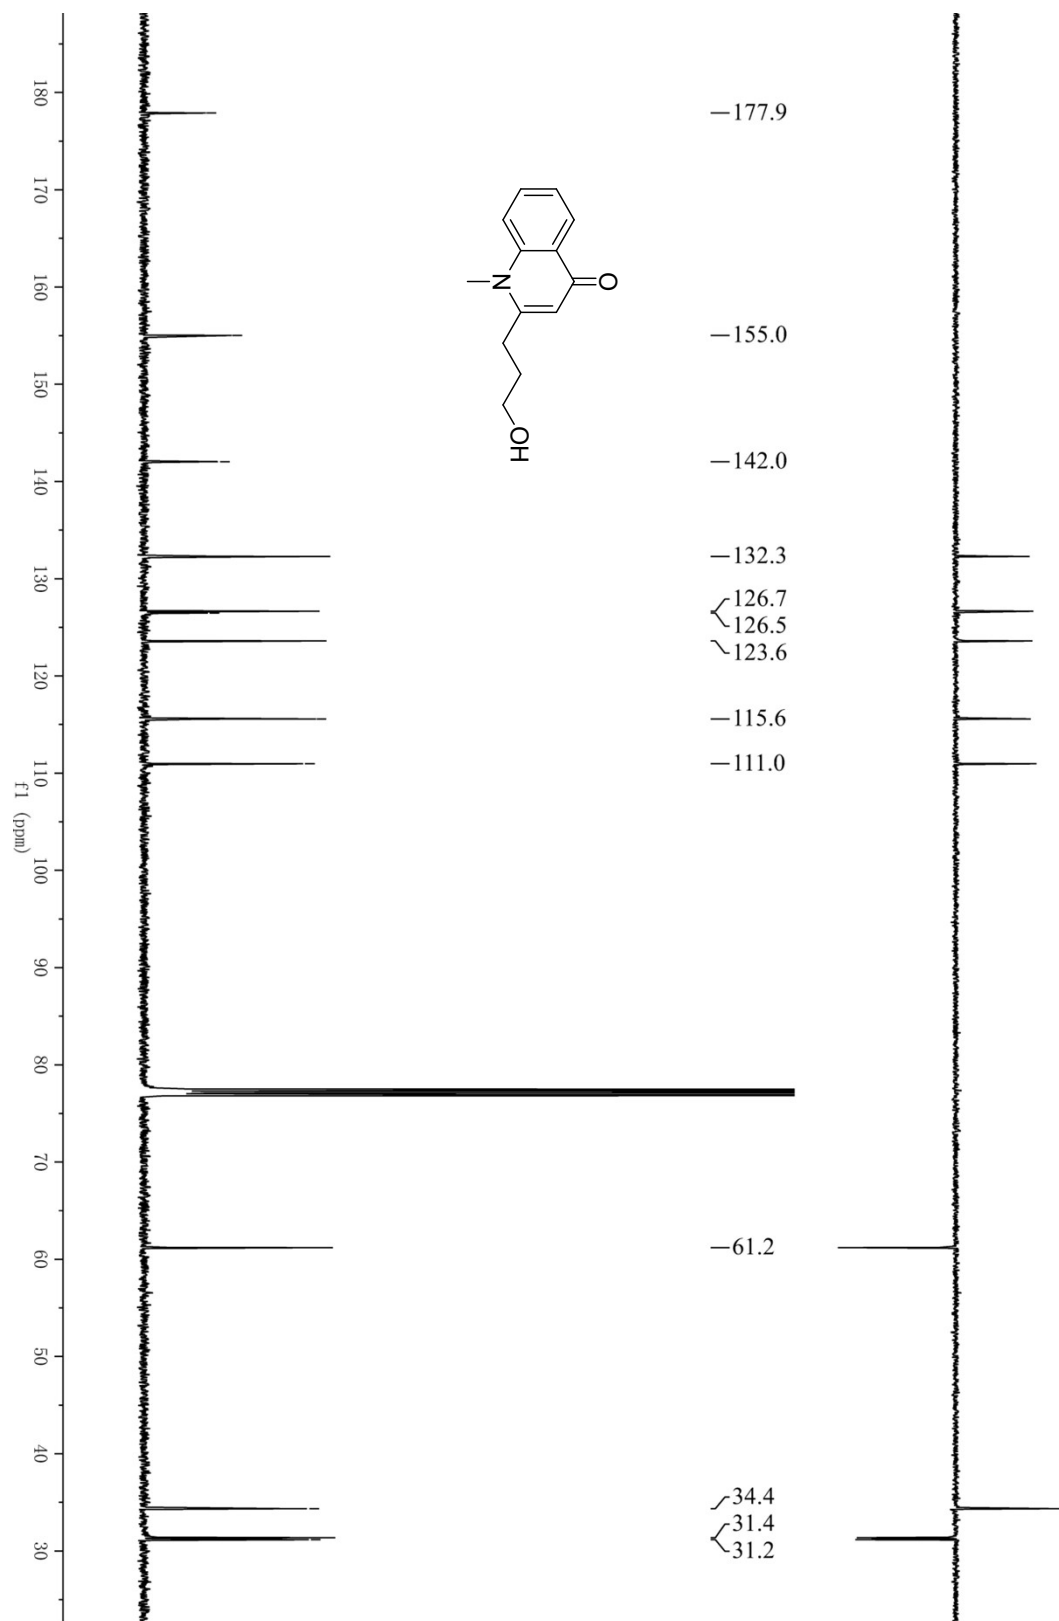

**Fig. S28** HSQC spectrum of **3**

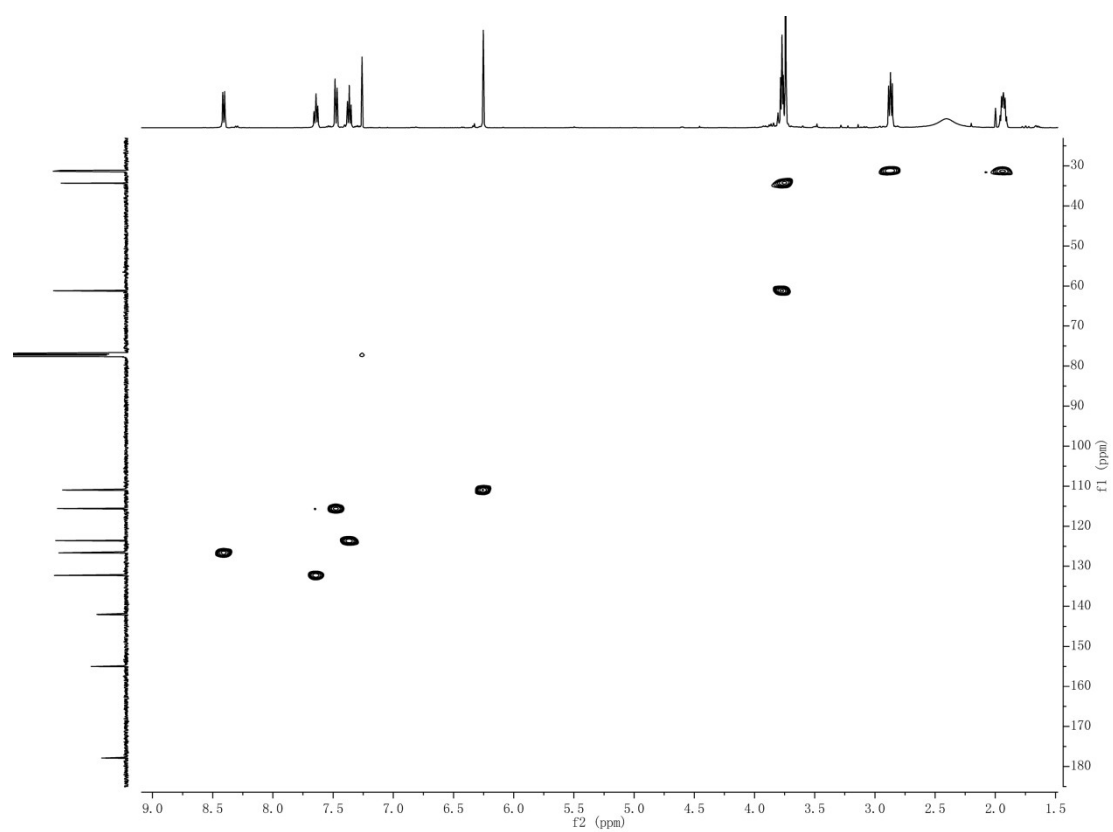

**Fig. S29** HMBC spectrum of **3**

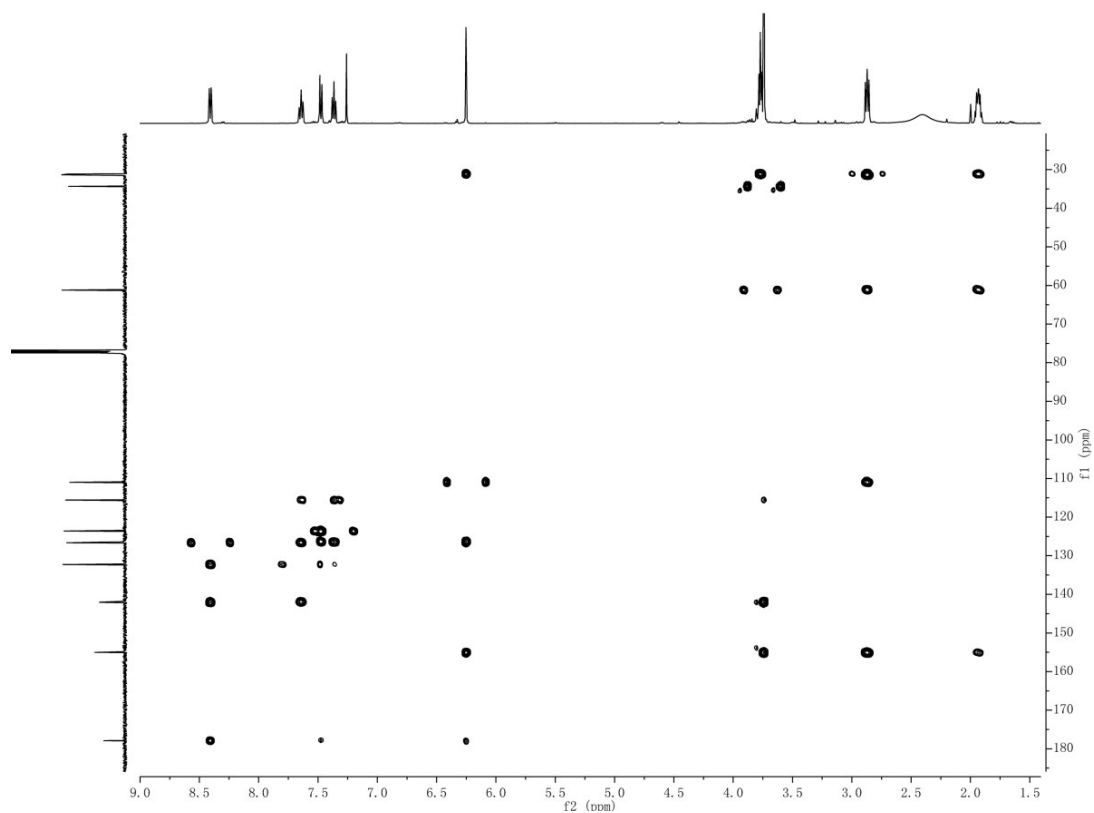

Fig. S30 COSY spectrum of 3

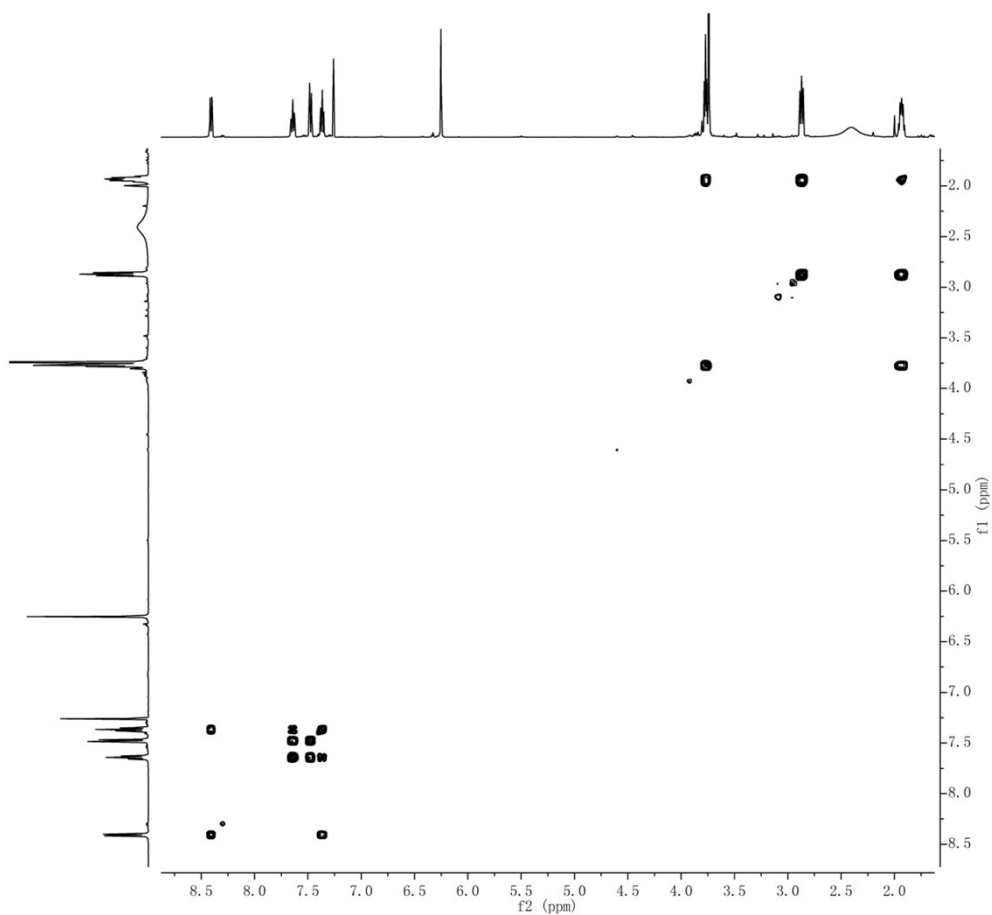

Fig. S31 ESI-MS spectrum of 3

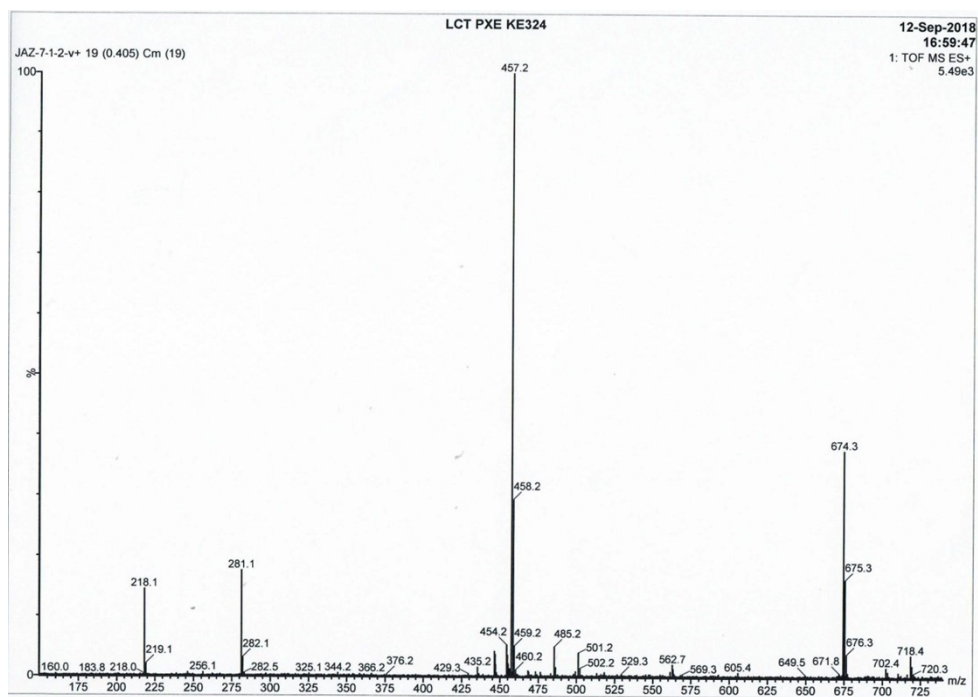



**Fig. S32** HRESI-MS spectrum of **3**

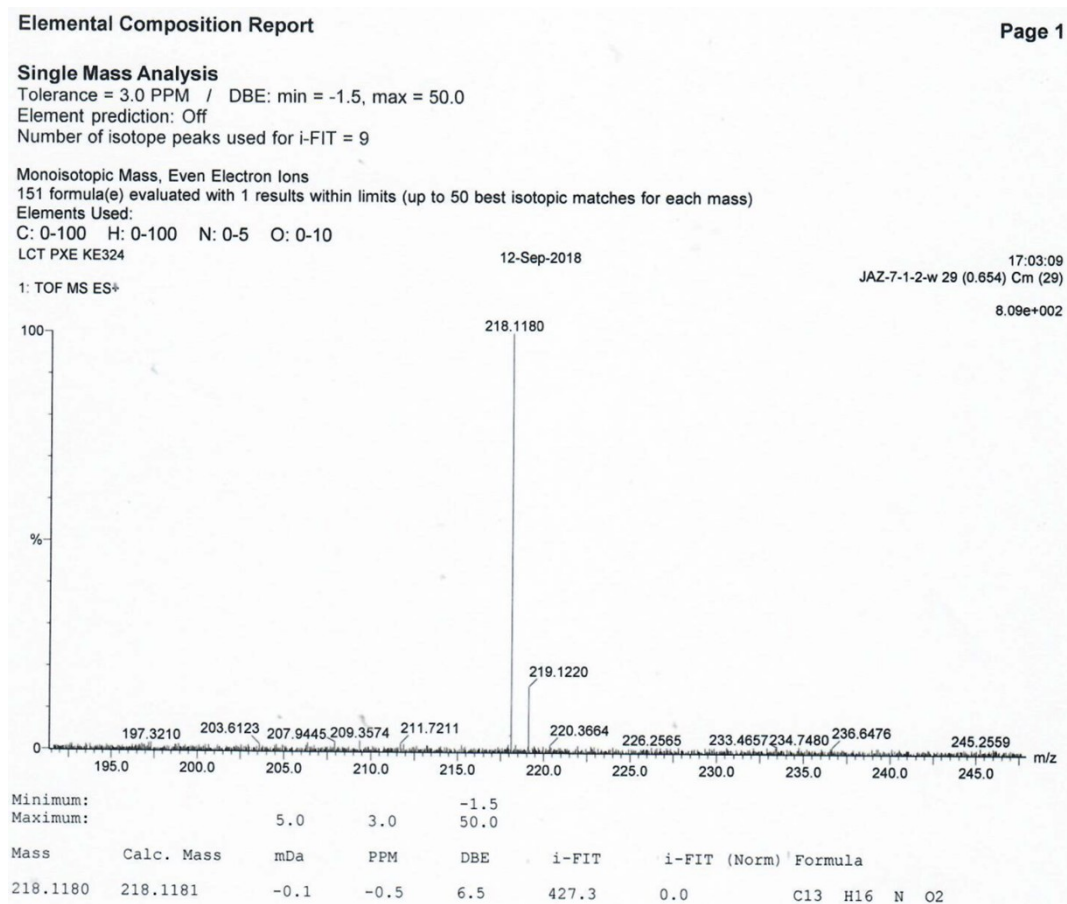

**Fig. S33** IR spectrum of **3**

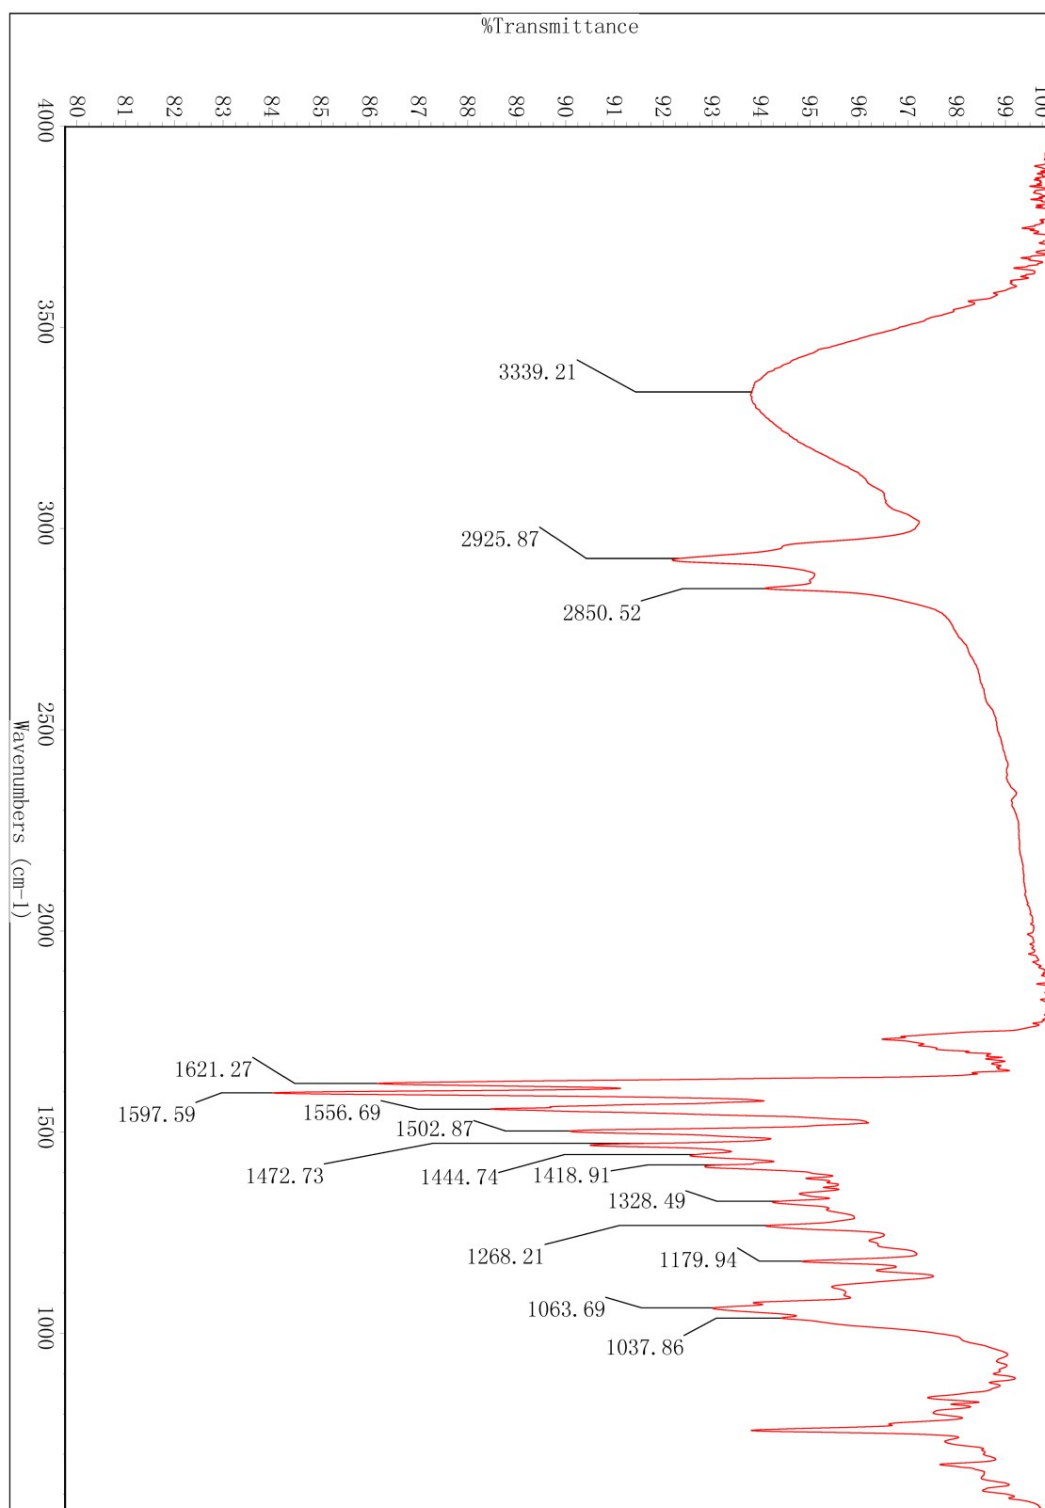

Fig. S34 <sup>1</sup>H NMR spectrum of **4** in CDCl<sub>3</sub>

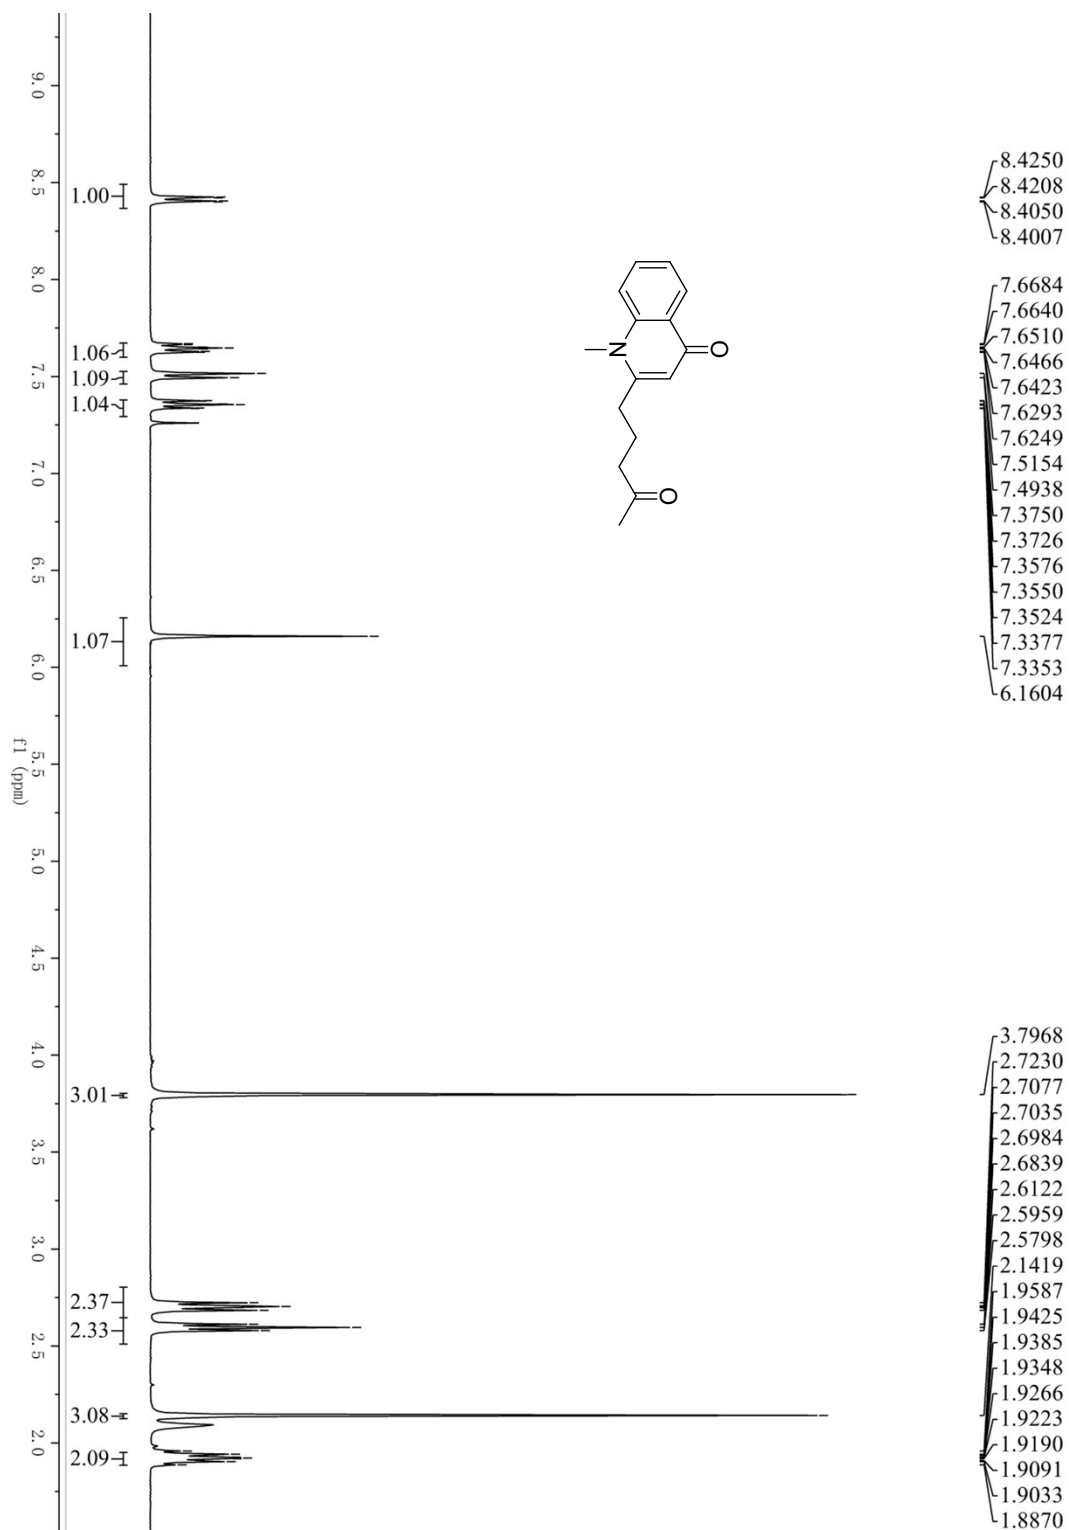

Fig. S35  $^{13}\text{C}$  NMR spectrum of **4** in  $\text{CDCl}_3$

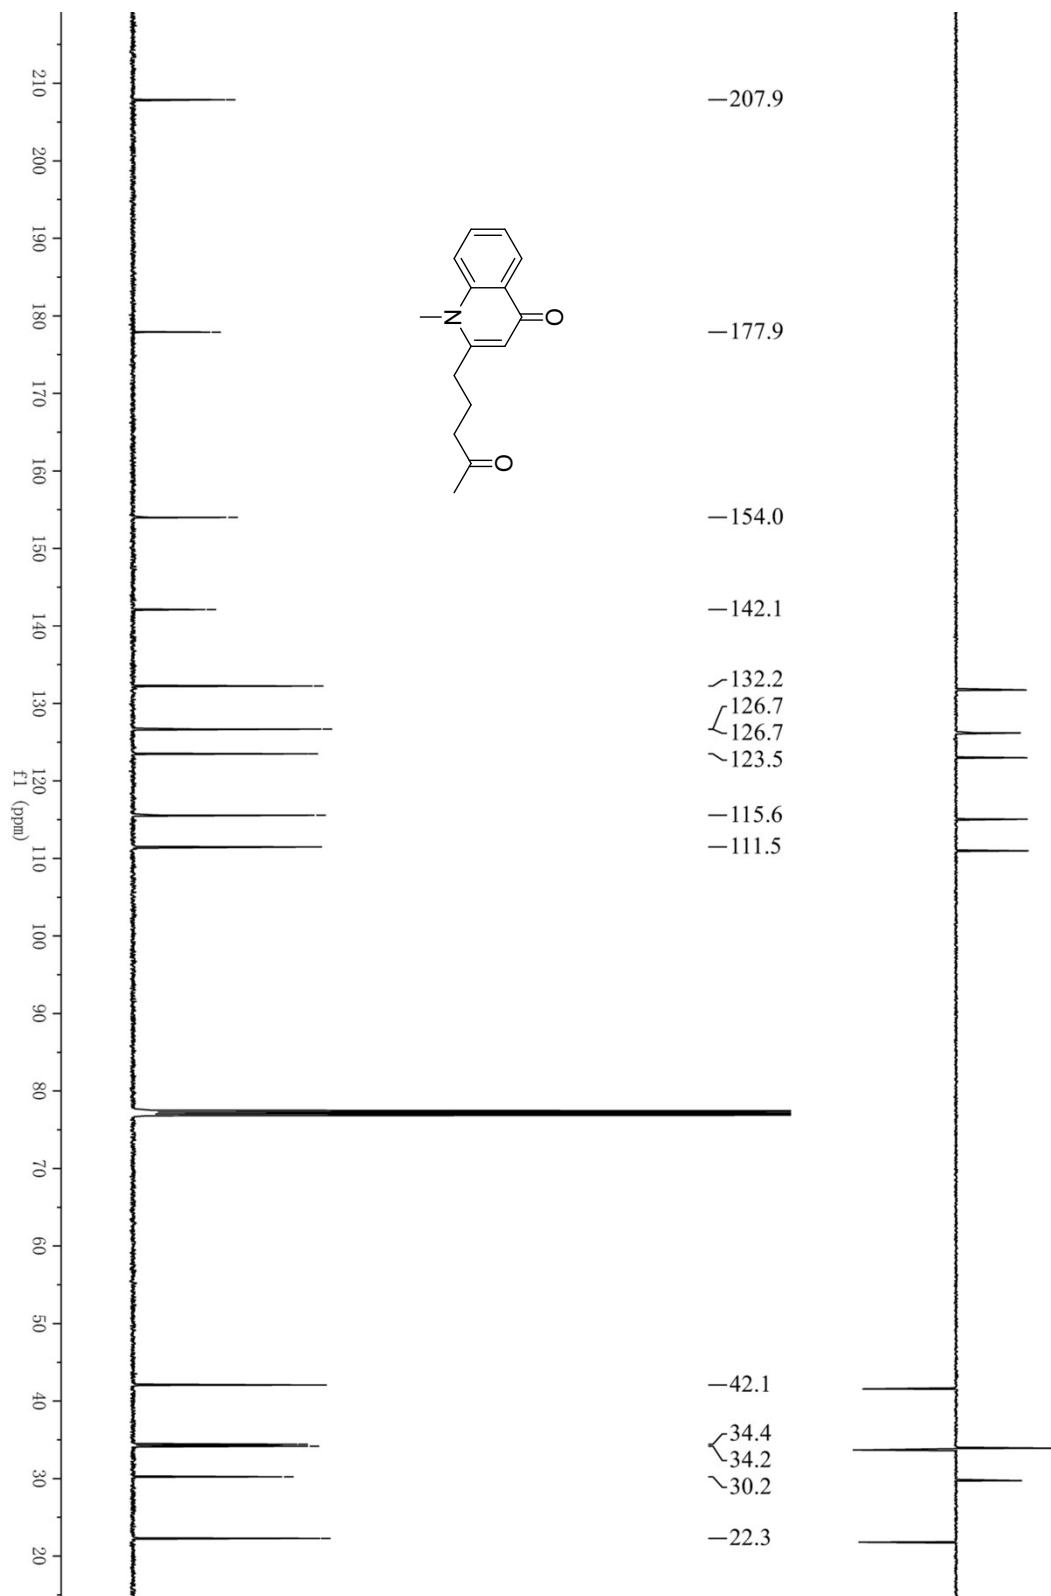

**Fig. S36** HSQC spectrum of **4**

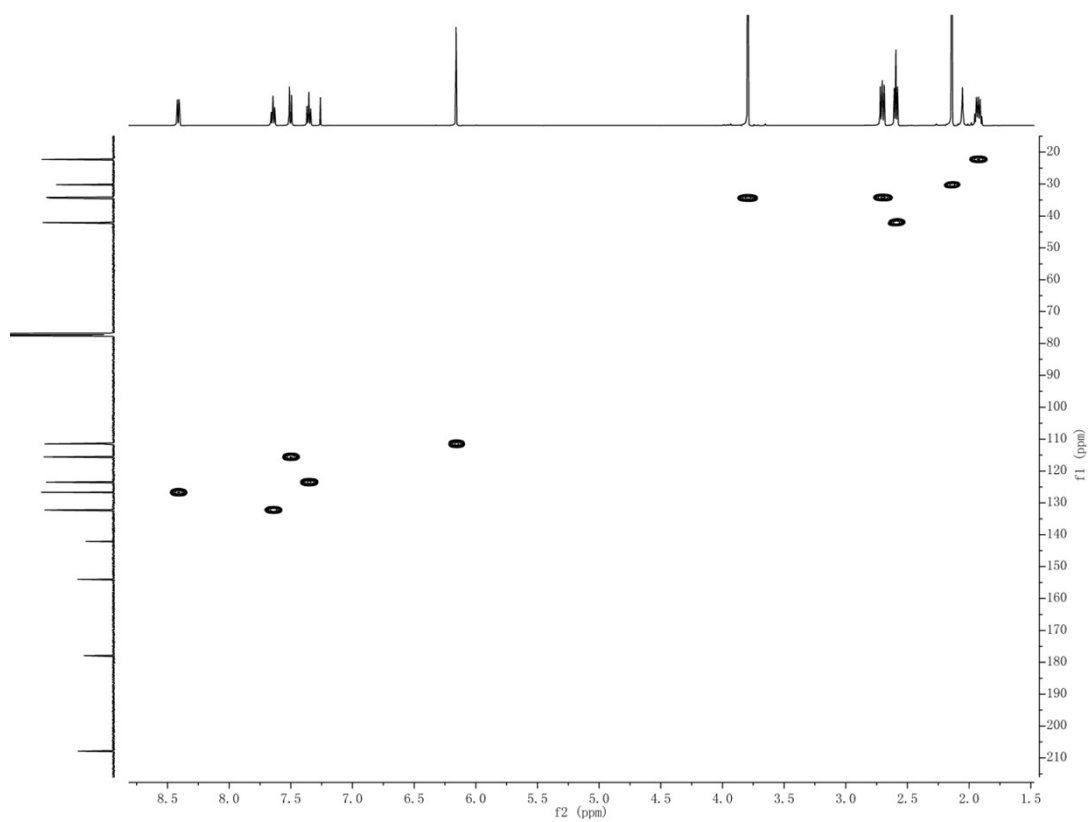

**Fig. S37** HMBC spectrum of **4**

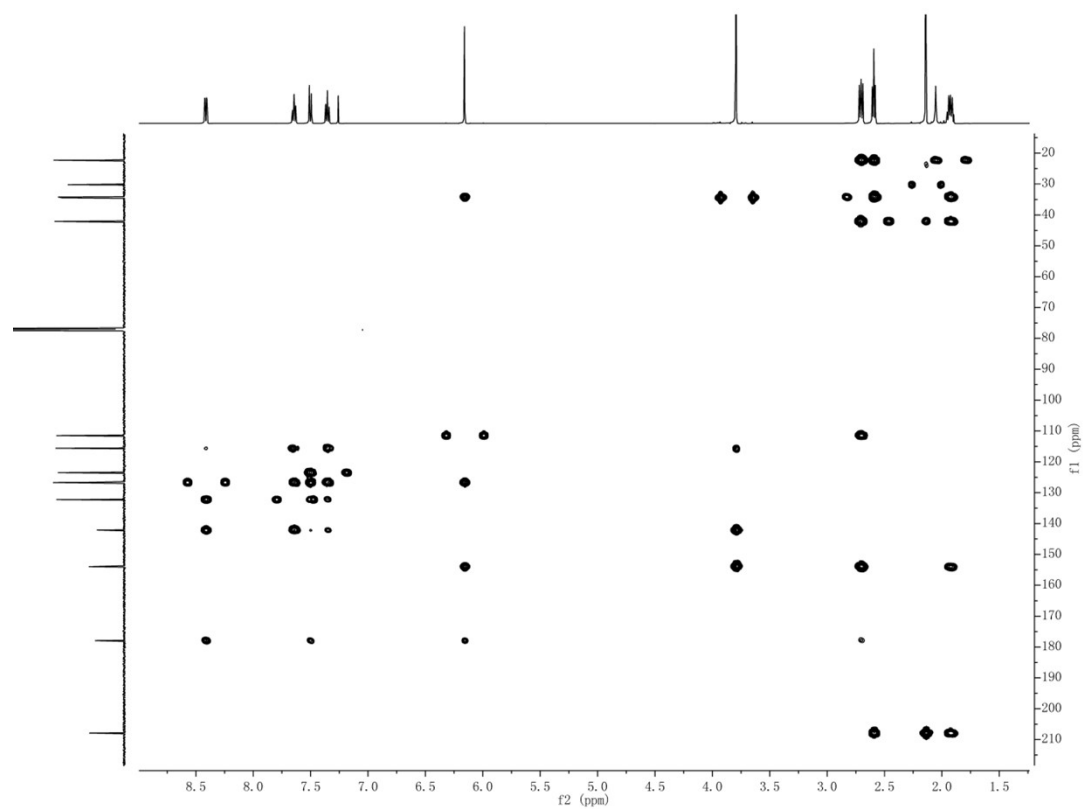

Fig. S38 COSY spectrum of 4

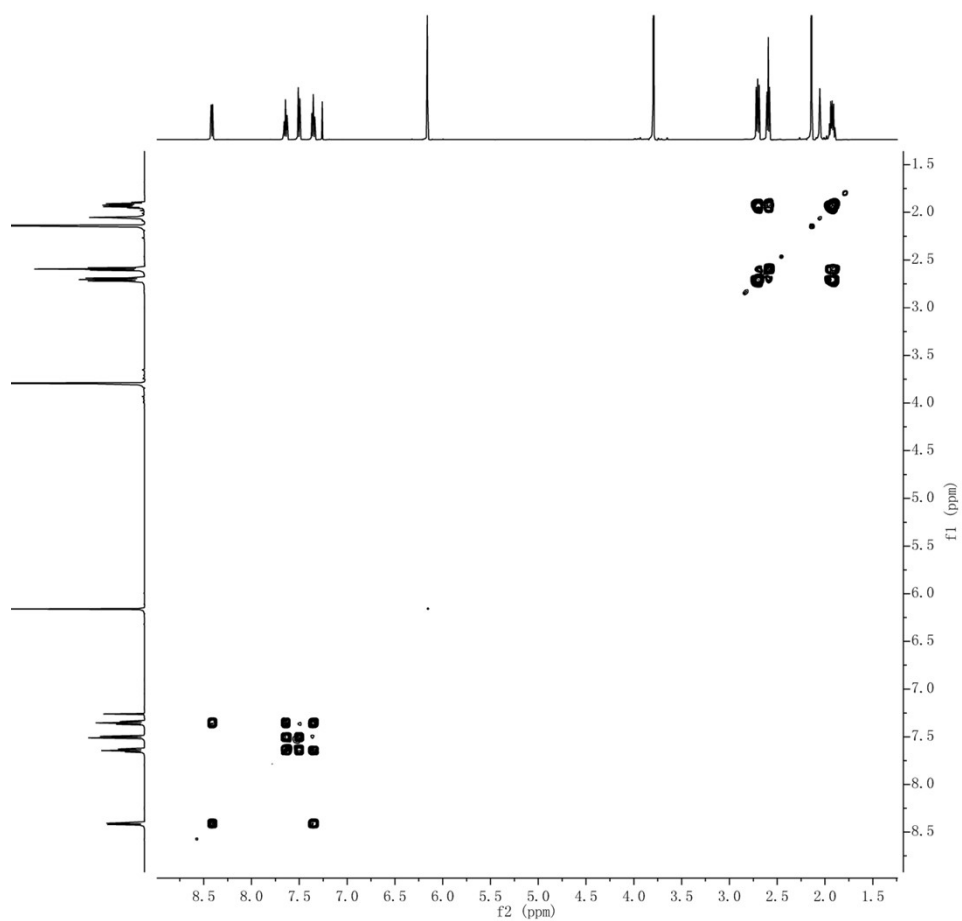

Fig. S39 ESI-MS spectrum of 4

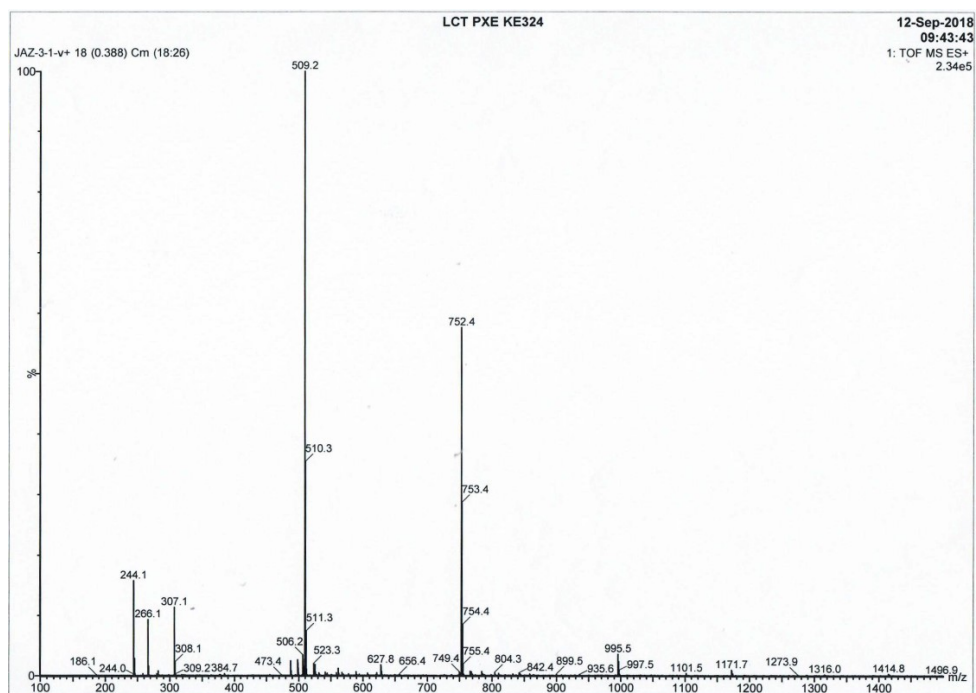

**Fig. S40** HRESI-MS spectrum of **4**

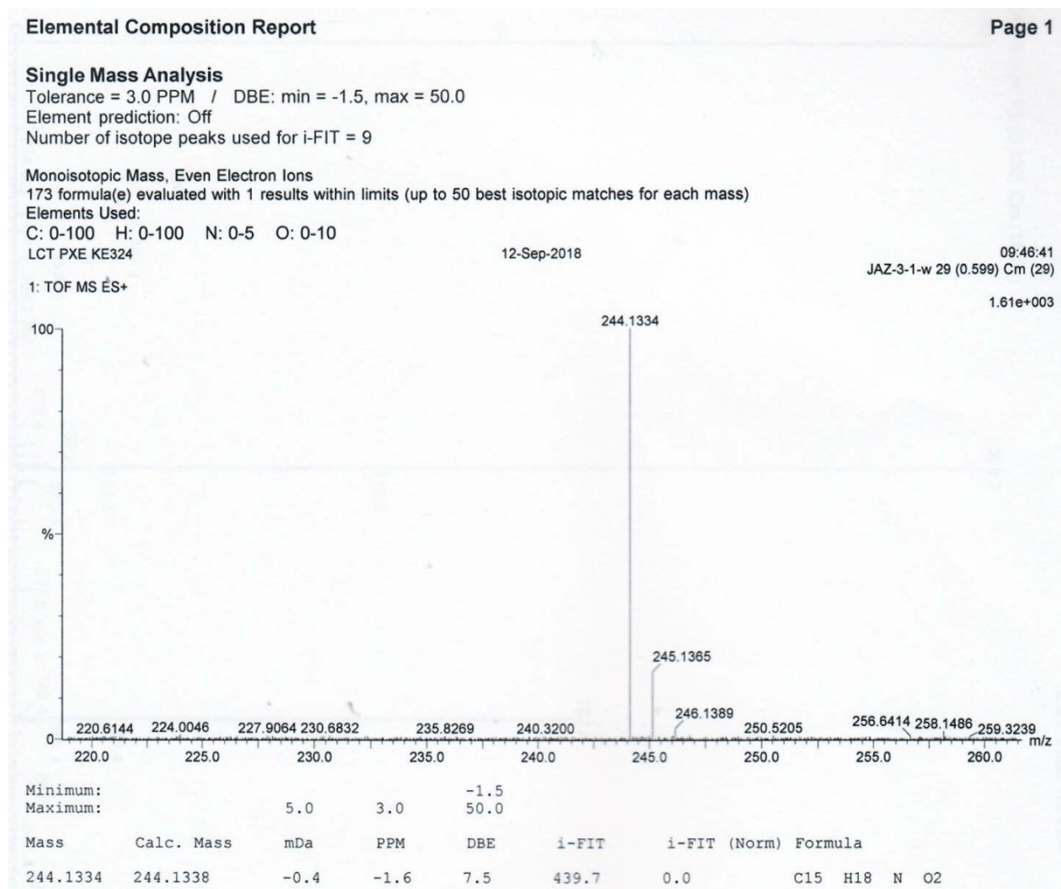

Fig. S41 IR spectrum of 4

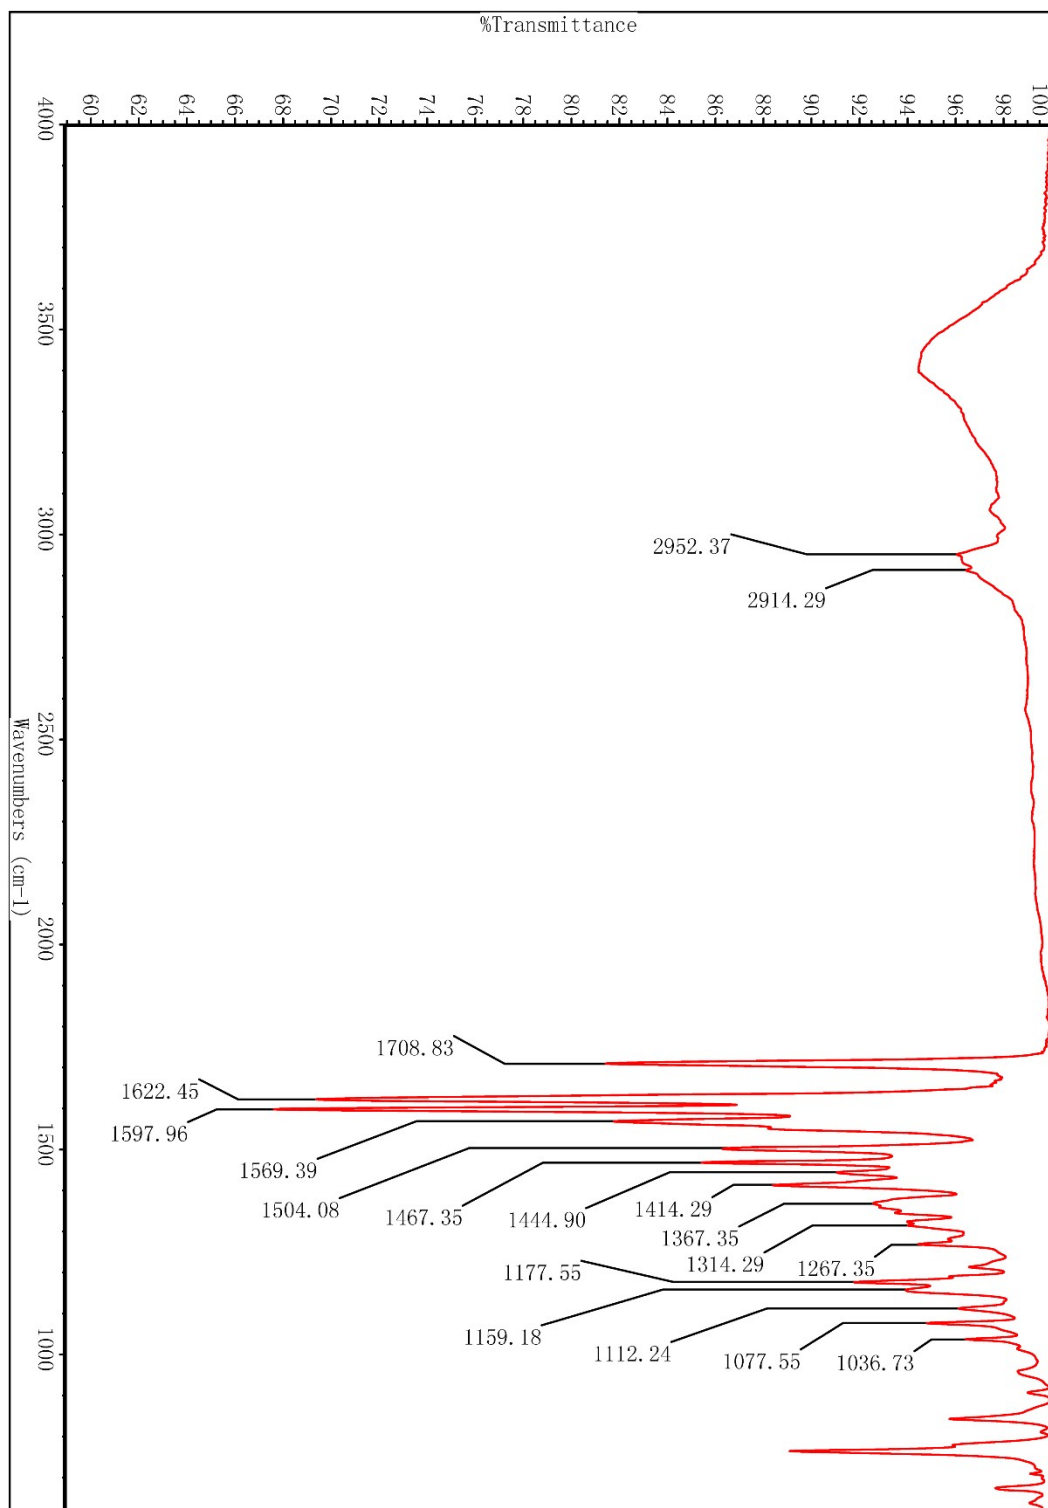



Fig. S42 <sup>1</sup>H NMR spectrum of **5** in CDCl<sub>3</sub>

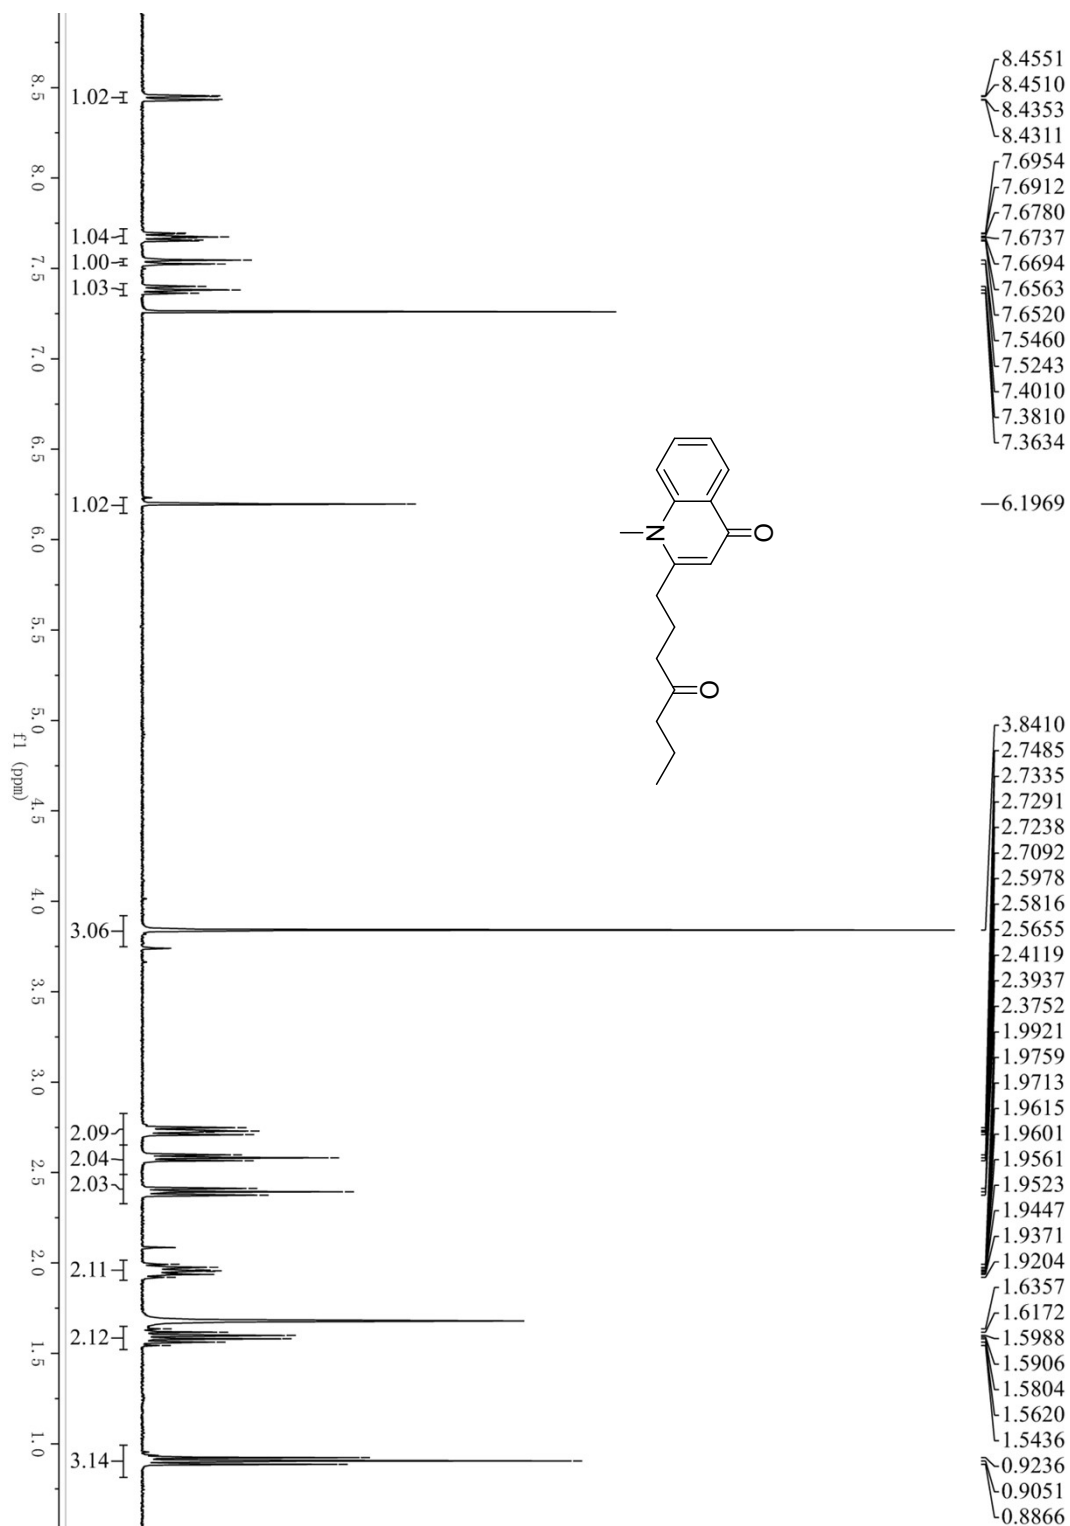

Fig. S43  $^{13}\text{C}$  NMR spectrum of **5** in  $\text{CDCl}_3$

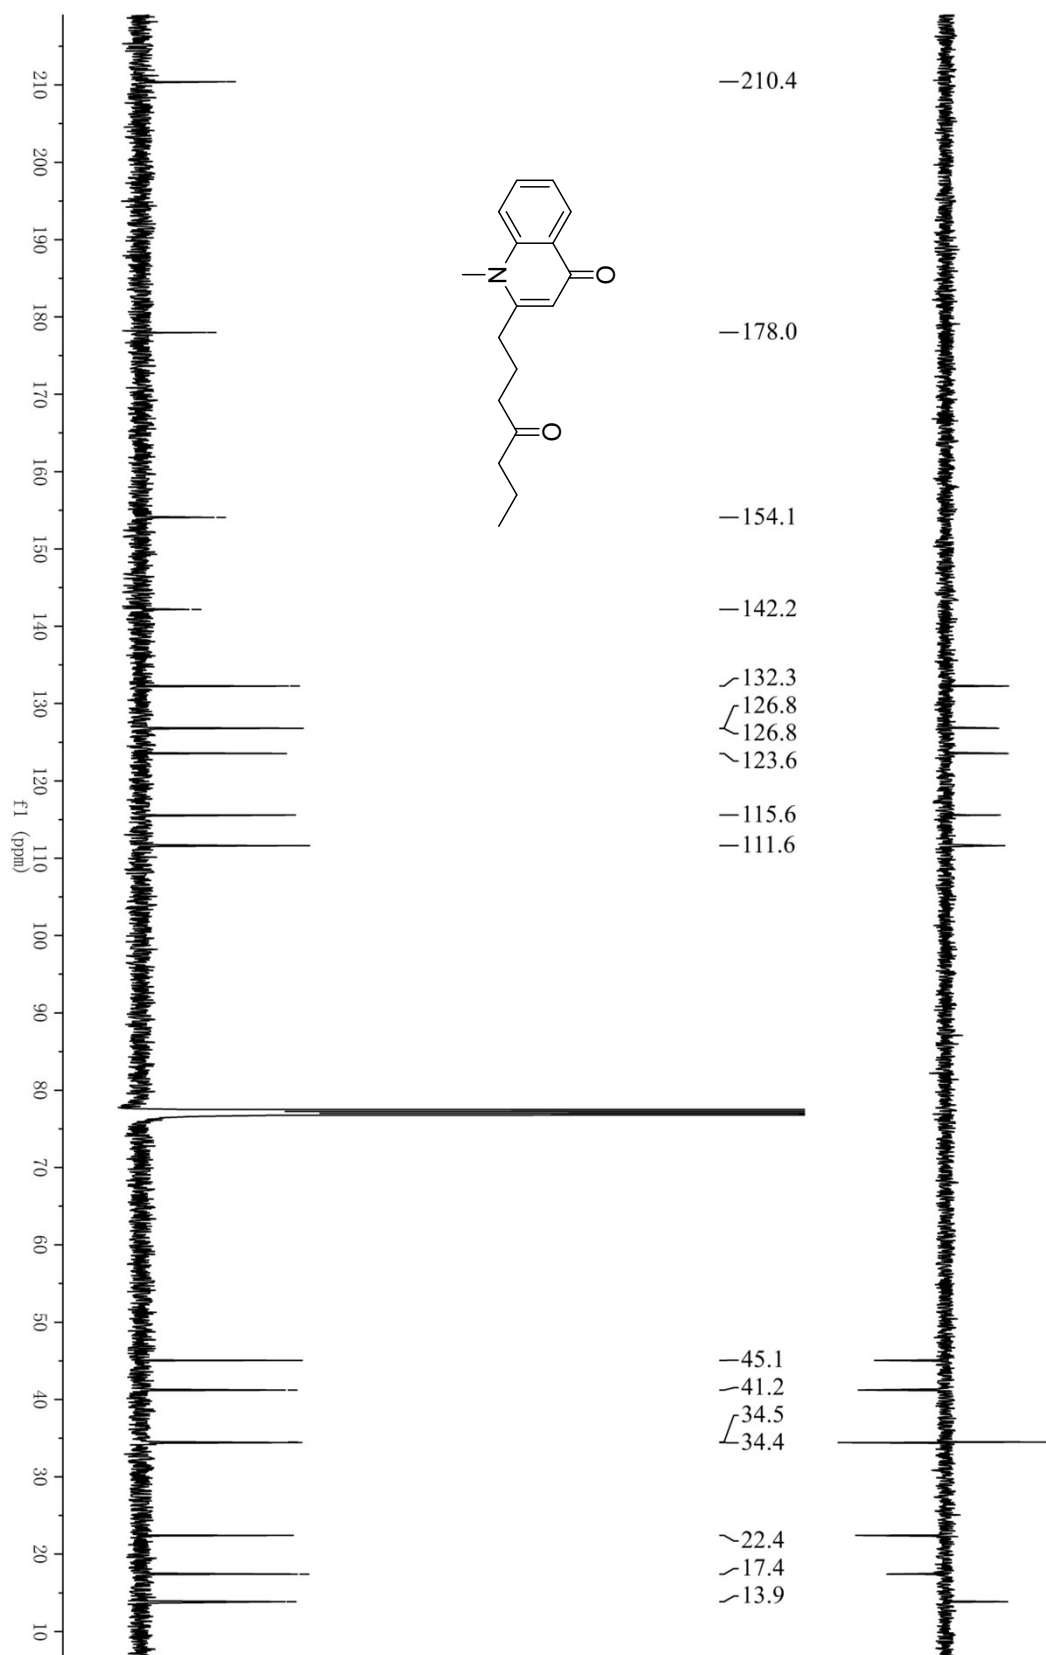

Fig. S44 HSQC spectrum of **5**

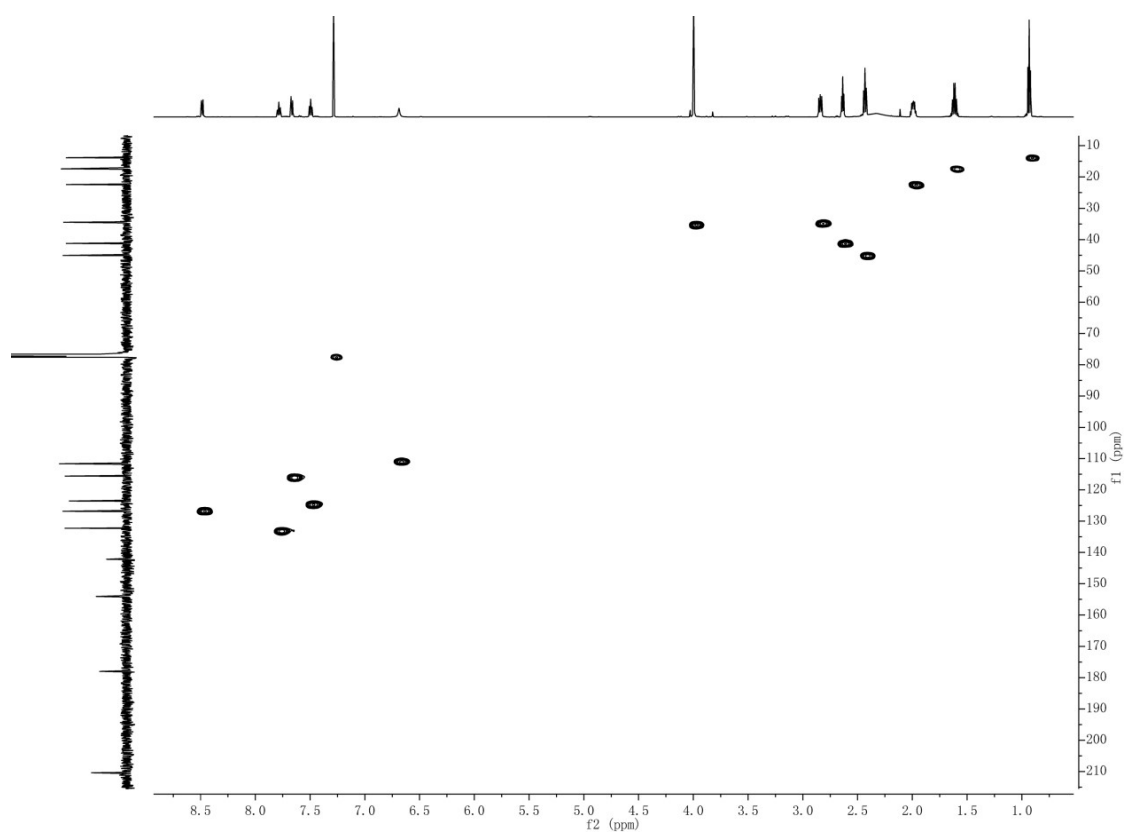

Fig. S45 HMBC spectrum of **5**

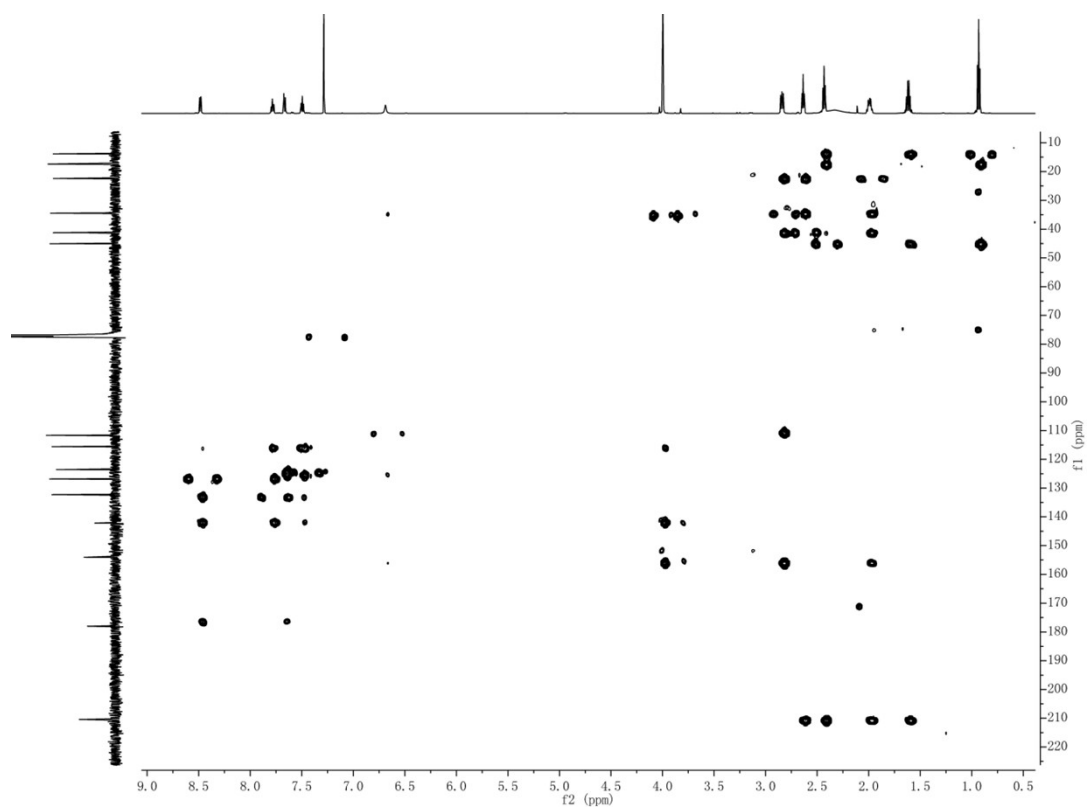

Fig. S46 COSY spectrum of 5

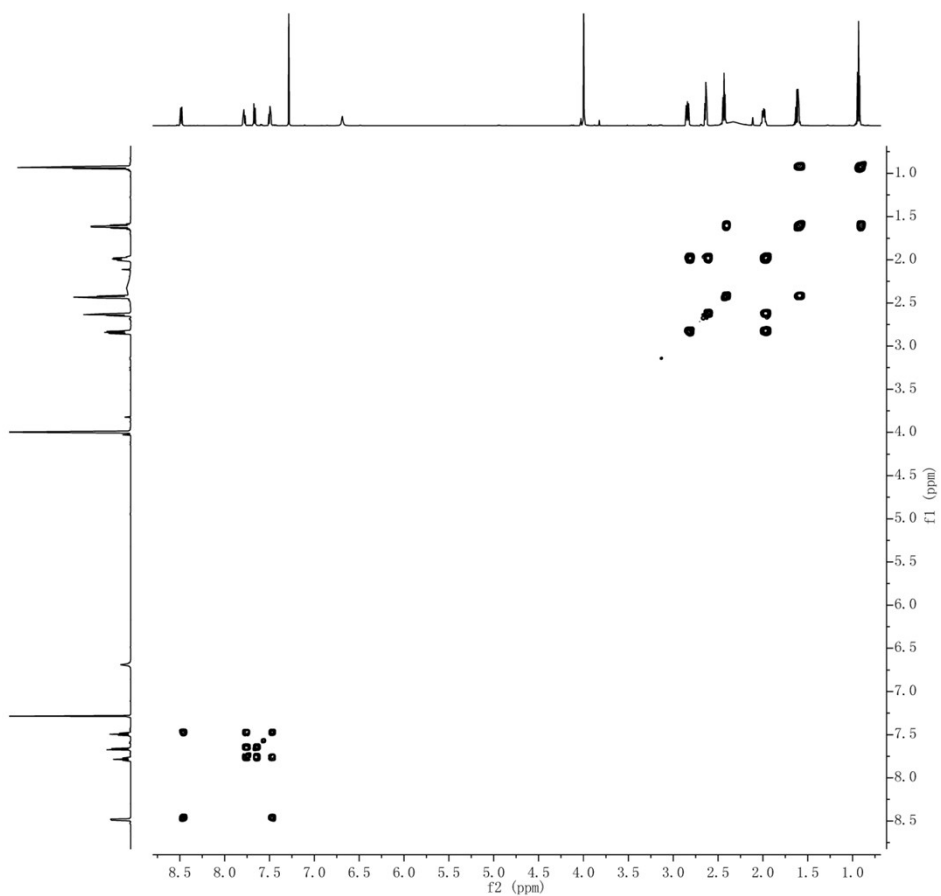

Fig. S47 ESI-MS spectrum of 5

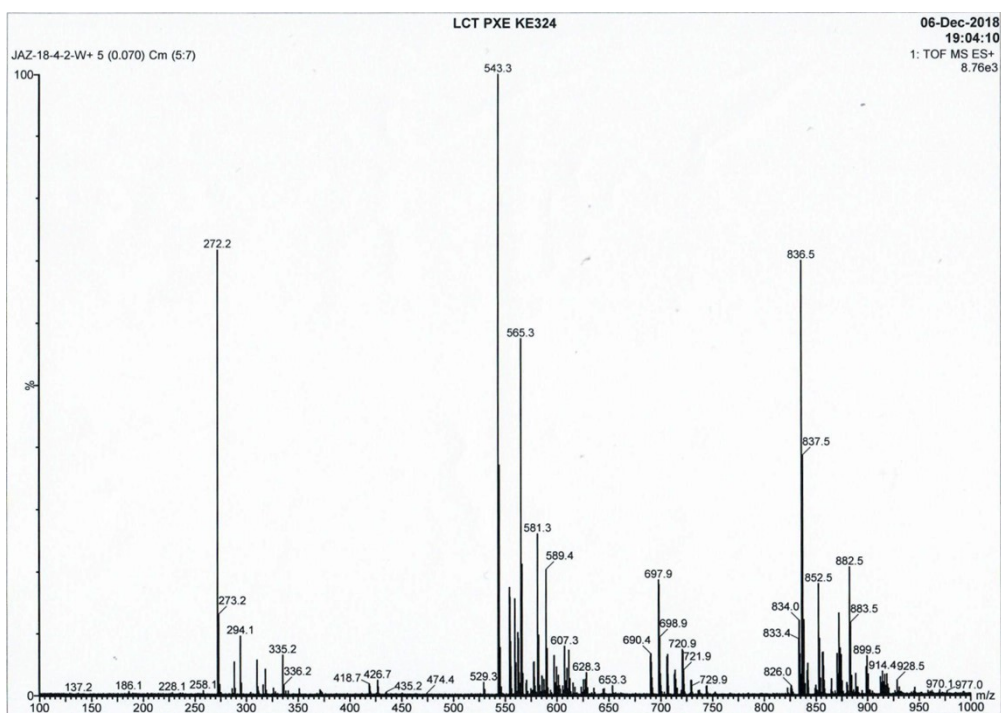

**Fig. S48** HRESI-MS spectrum of **5**

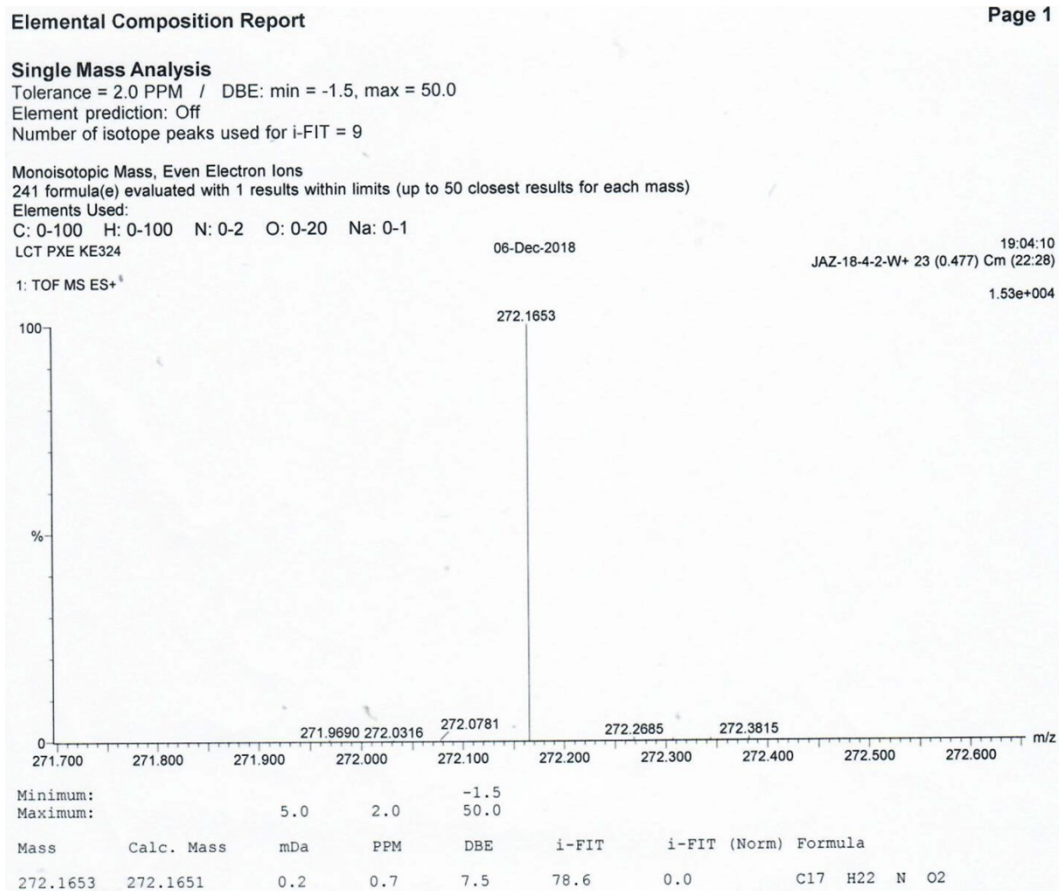

**Fig. S49** IR spectrum of **5**

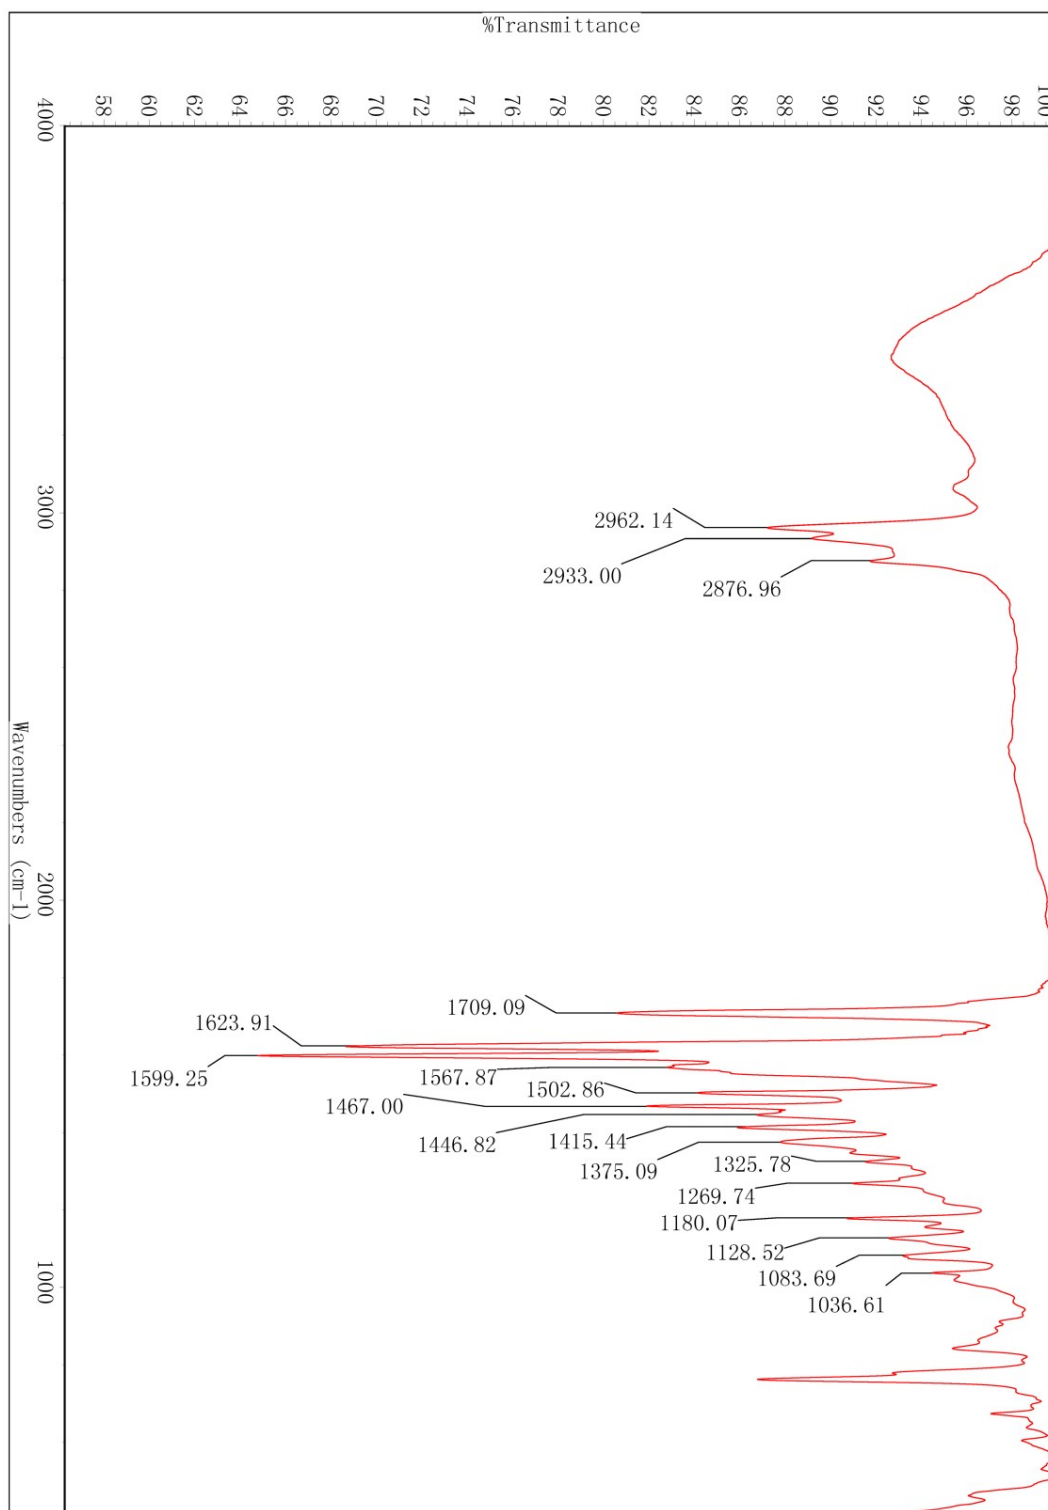

Fig. S50 <sup>1</sup>H NMR spectrum of **6** in CDCl<sub>3</sub>

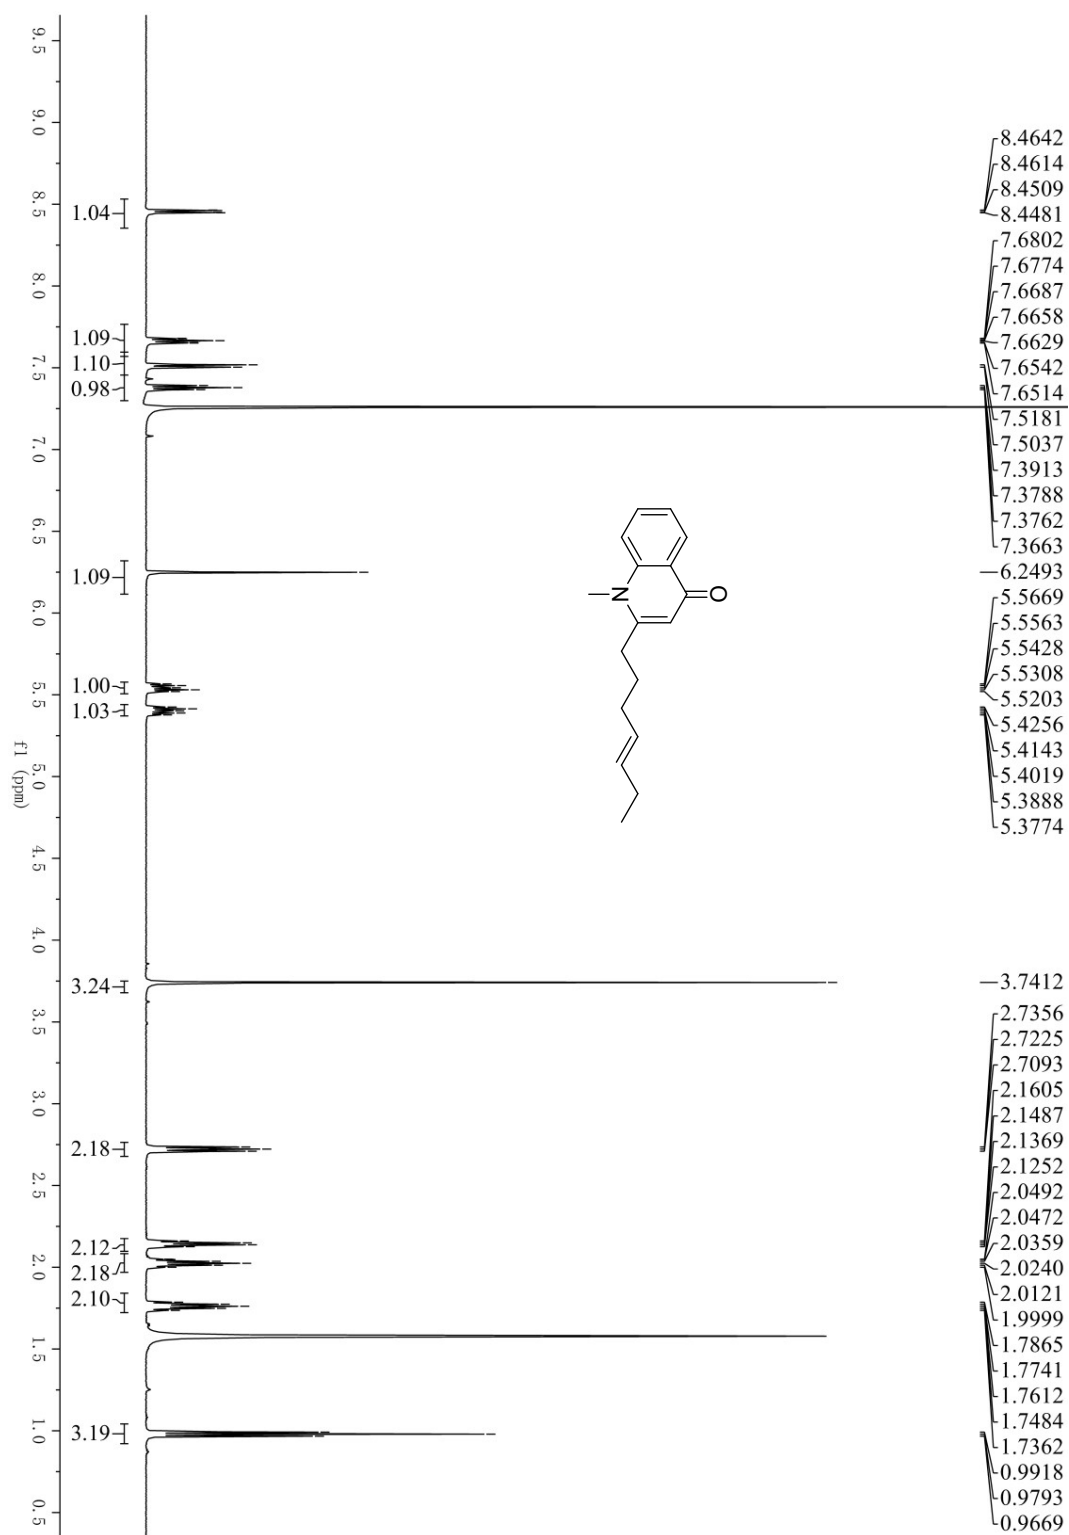

Fig. S51  $^{13}\text{C}$  NMR spectrum of **6** in  $\text{CDCl}_3$

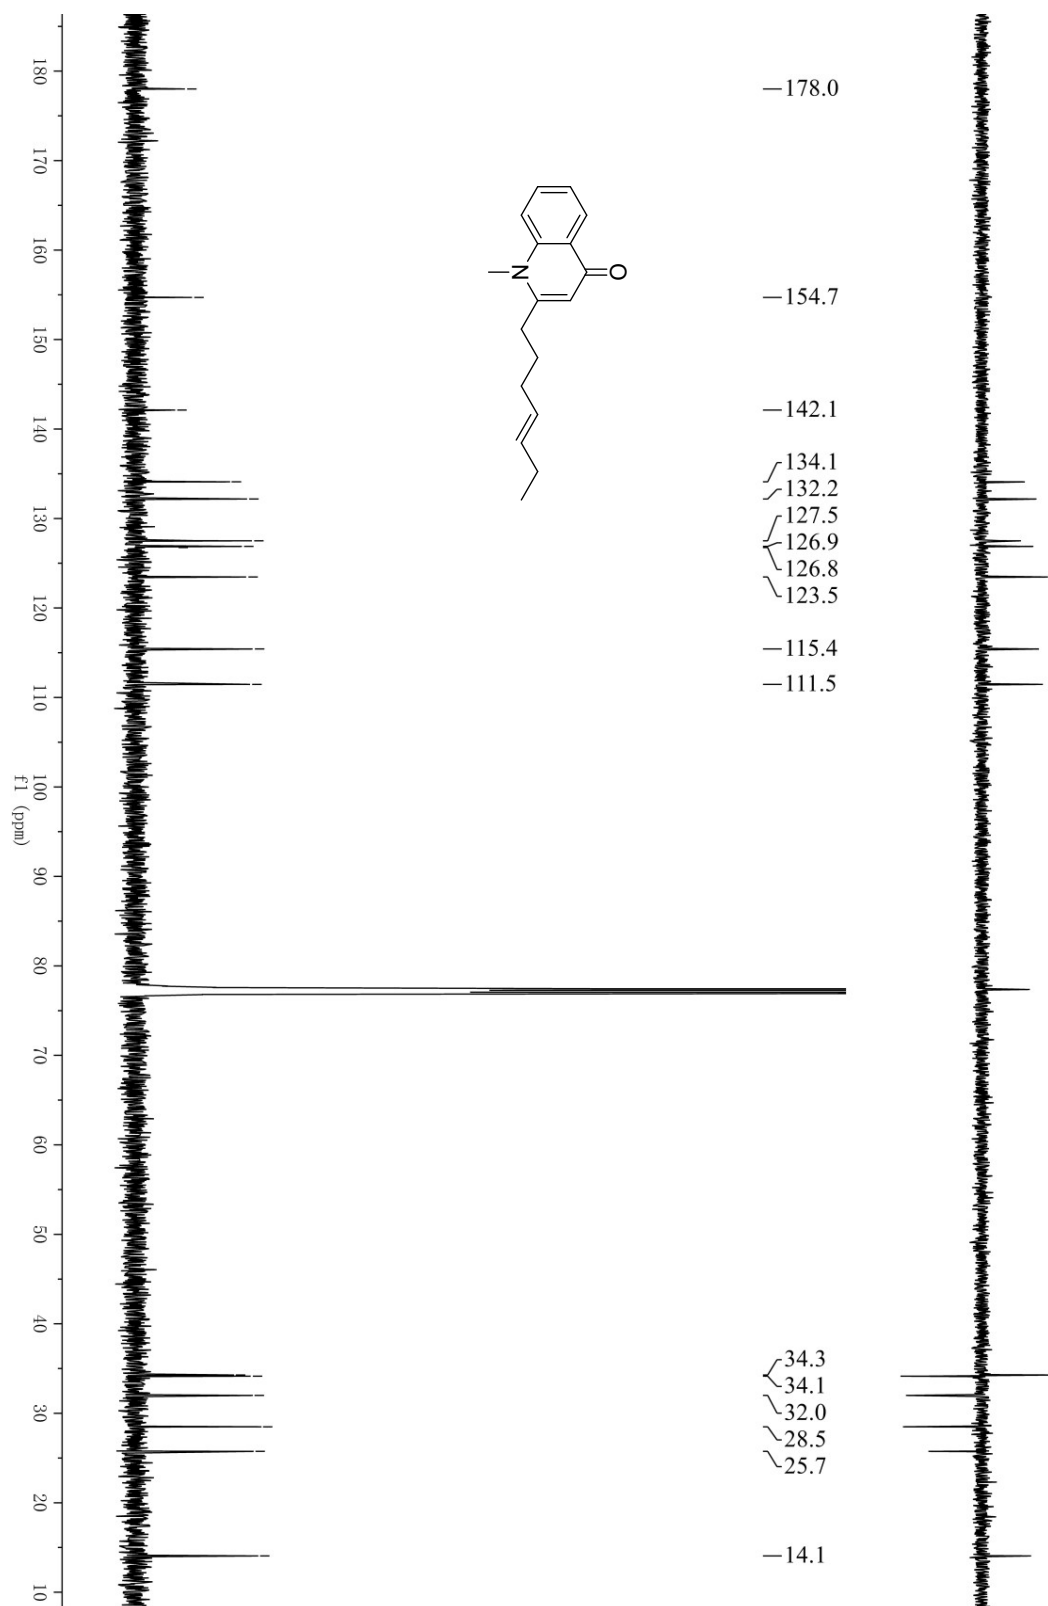



Fig. S52 HSQC spectrum of **6**

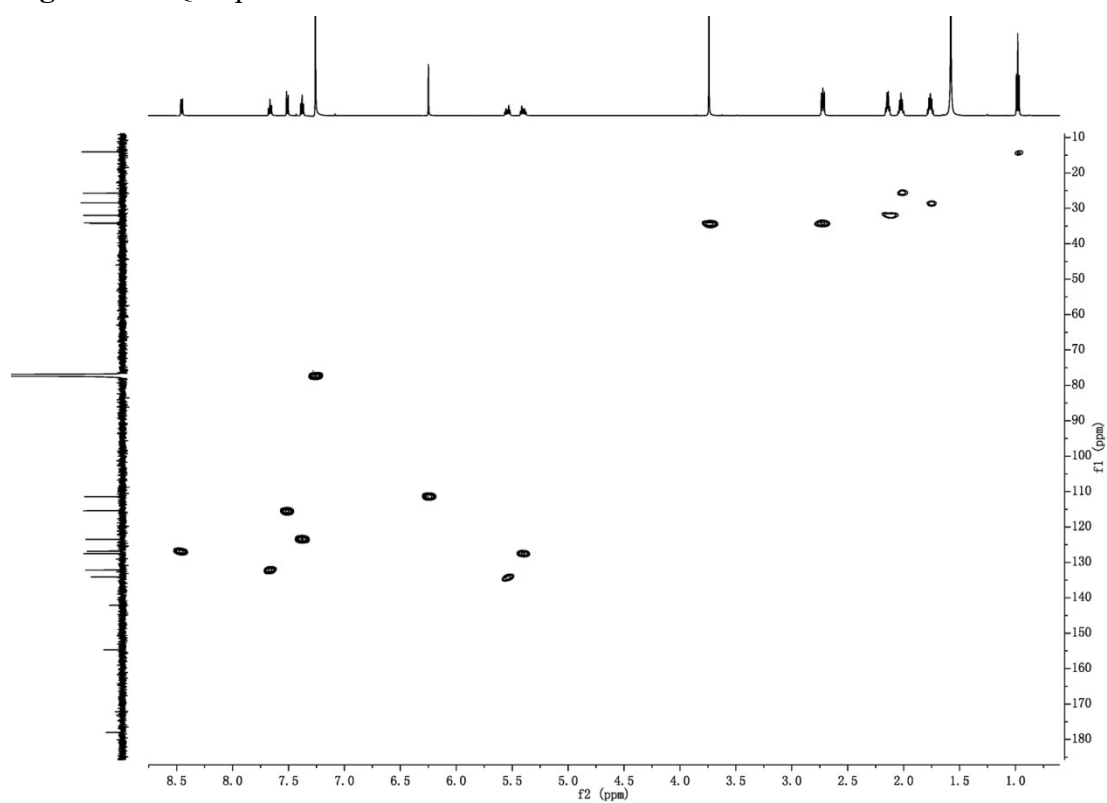

Fig. S53 HMBC spectrum of **6**

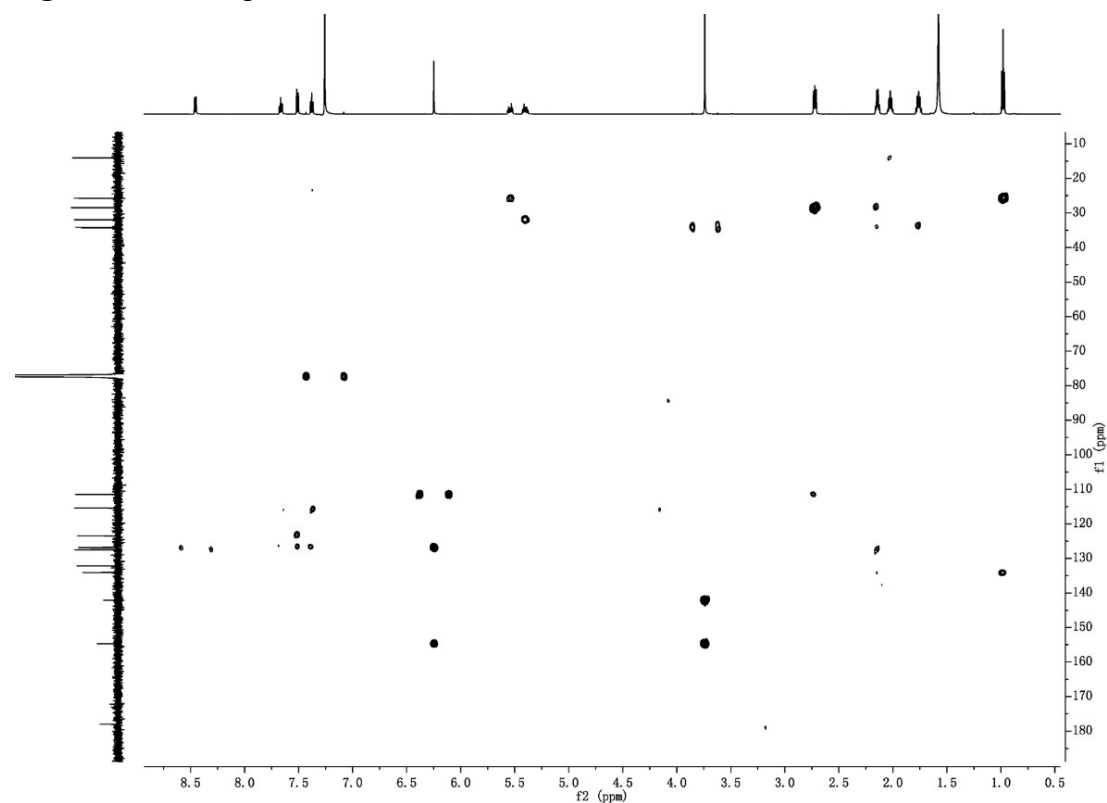

**Fig. S54** COSY spectrum of **6**

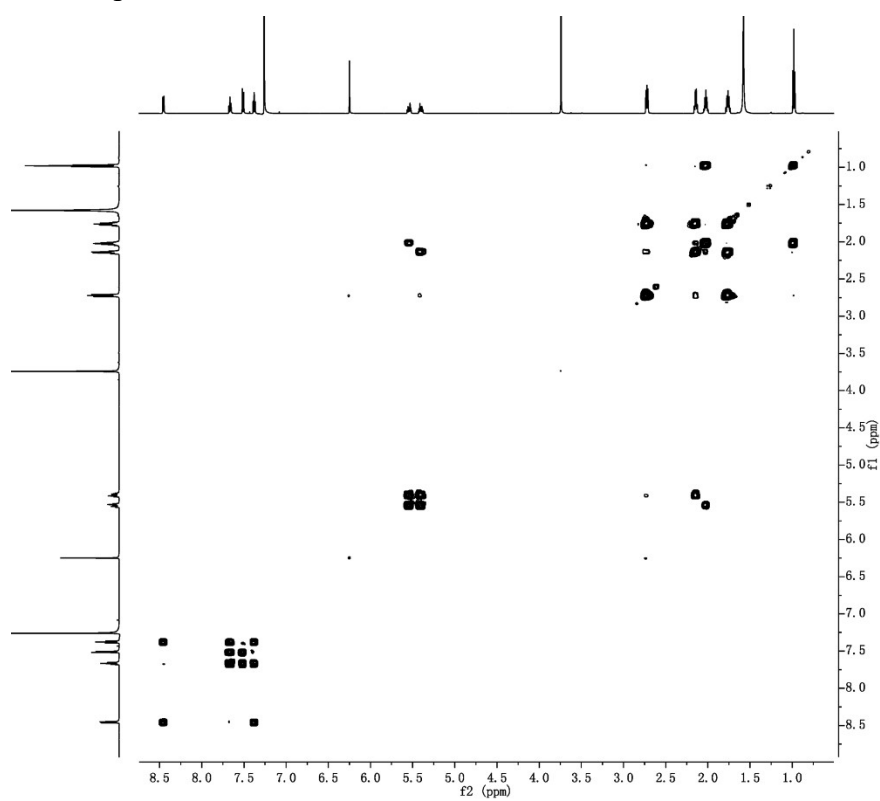

**Fig. S55** ROESY spectrum of **6**

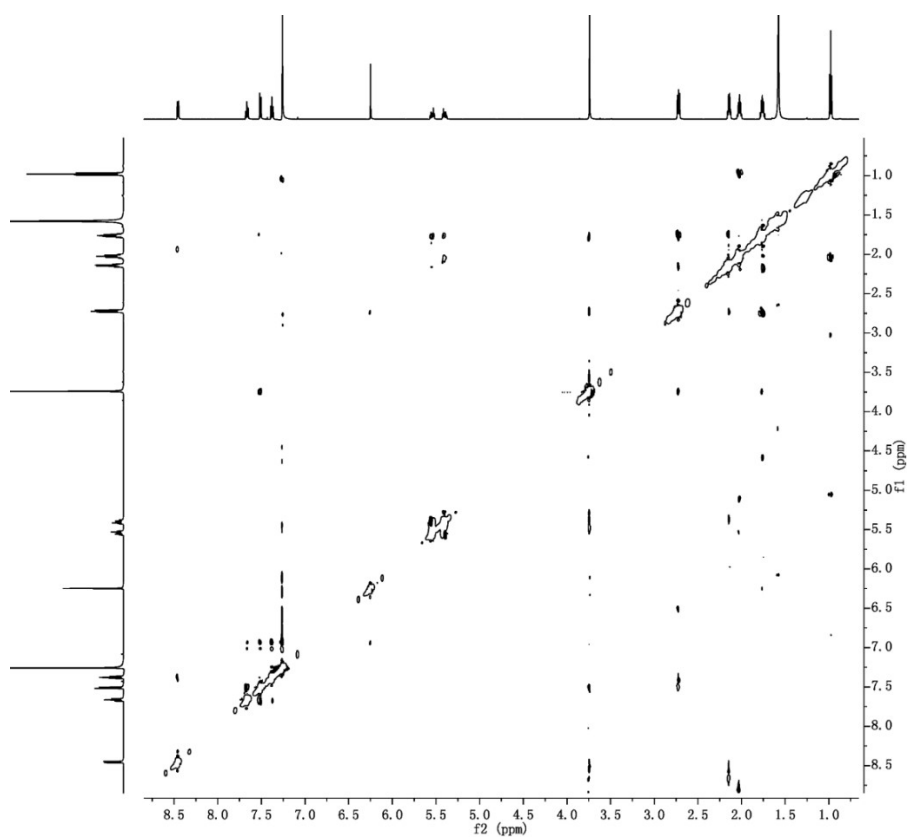

**Fig. S56** ESI-MS spectrum of **6**

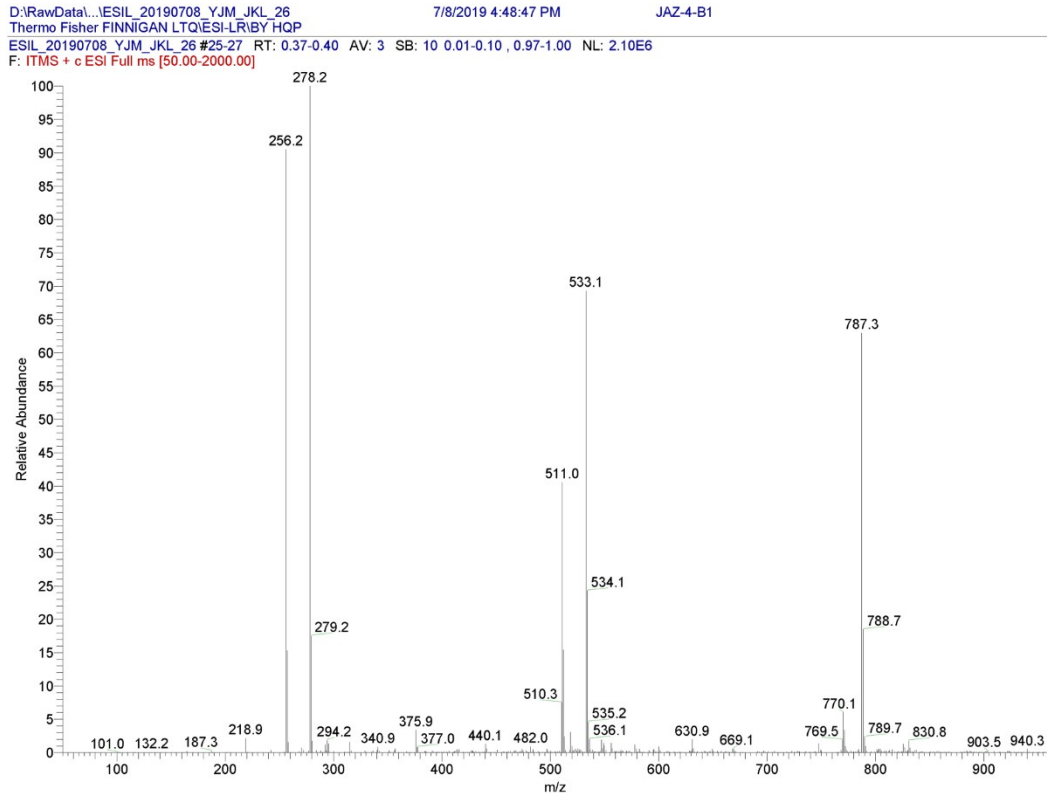

**Fig. S57** HRESI-MS spectrum of **6**

**Qualitative Analysis Report**

|                        |                                        |                               |                             |
|------------------------|----------------------------------------|-------------------------------|-----------------------------|
| <b>Data Filename</b>   | ESIH_20190709_YJM_JKL_03.d             | <b>Sample Name</b>            | JAZ-4-B1                    |
| <b>Sample Type</b>     | Sample                                 | <b>Position</b>               | P1-A2                       |
| <b>Instrument Name</b> | Agilent G6520 Q-TOF                    | <b>Acq Method</b>             | 20160322_MS_ESIH_POS_1min.m |
| <b>Acquired Time</b>   | 7/9/2019 15:13:57                      | <b>IRM Calibration Status</b> | Success                     |
| <b>DA Method</b>       | small molecular data analysis method.m | <b>Comment</b>                | ESIH by ZZY                 |

User Spectra

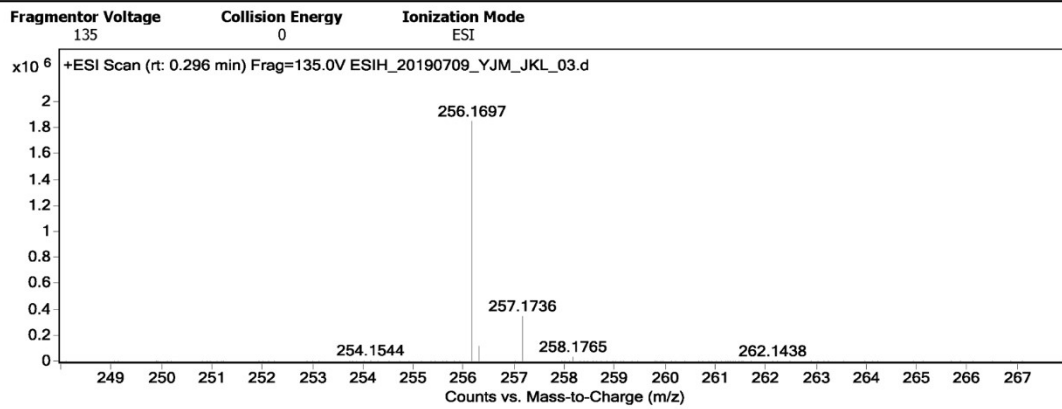

Formula Calculator Results

| m/z      | Calc m/z | Diff (mDa) | Diff (ppm) | Ion Formula | Ion                |
|----------|----------|------------|------------|-------------|--------------------|
| 256.1697 | 256.1696 | -0.06      | -0.24      | C17 H22 N O | (M+H) <sup>+</sup> |

--- End Of Report ---

Fig. S58 IR spectrum of 6

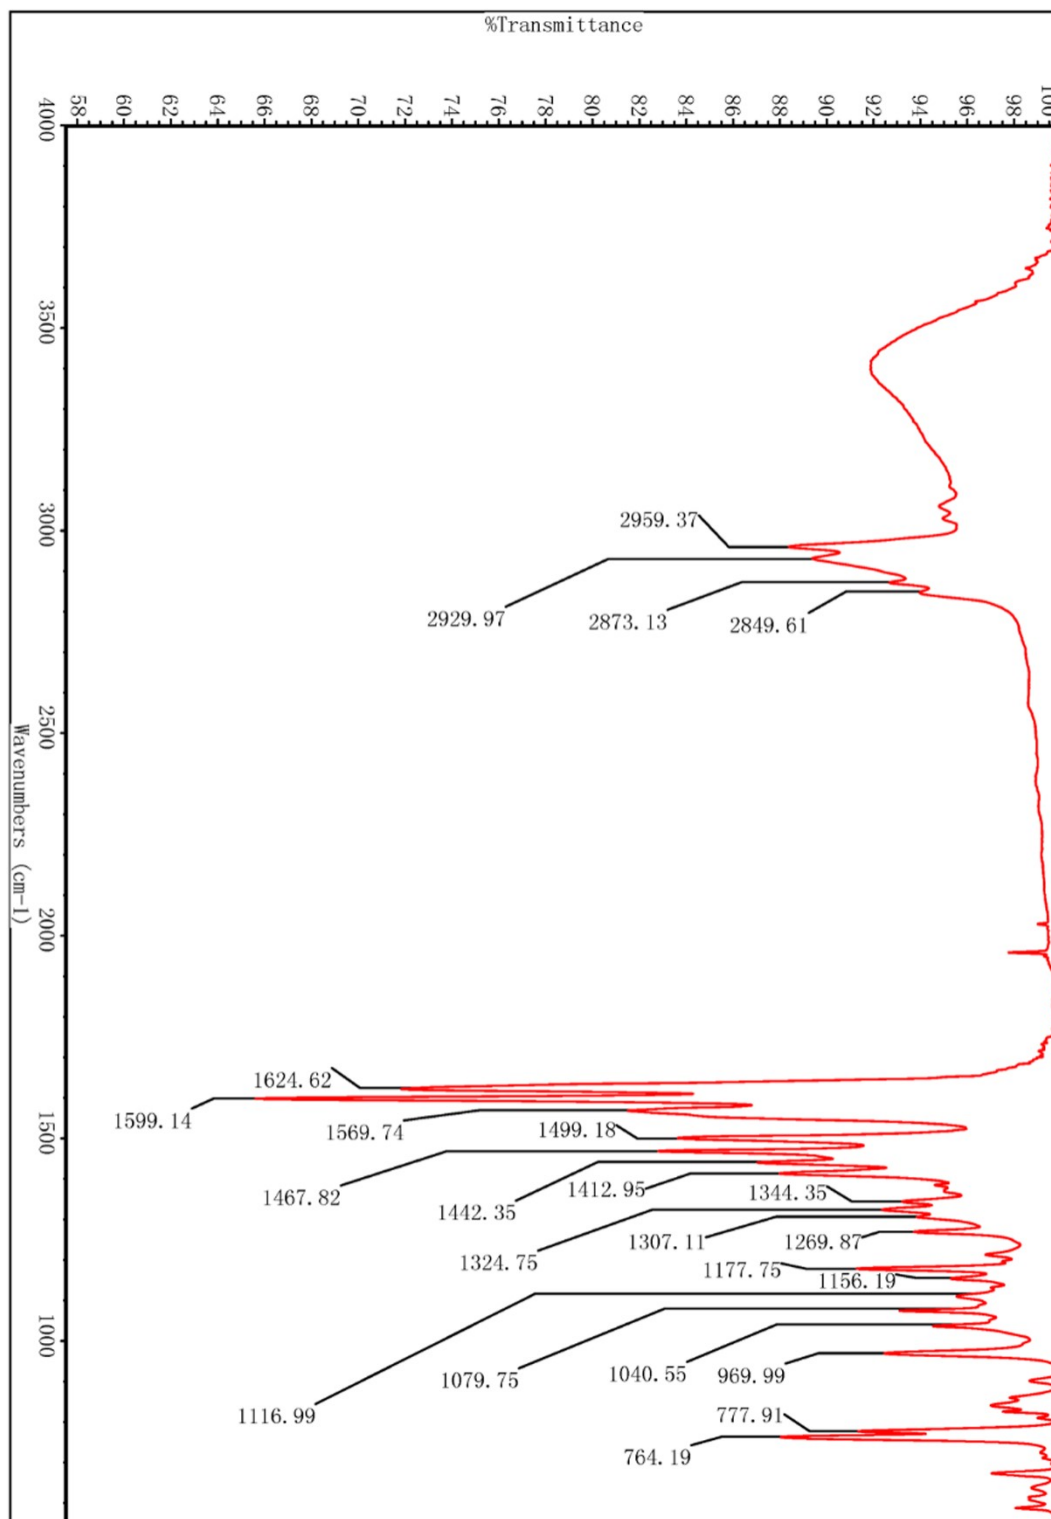

Fig. S59 <sup>1</sup>H NMR spectrum of (+)-7 in CD<sub>3</sub>OD

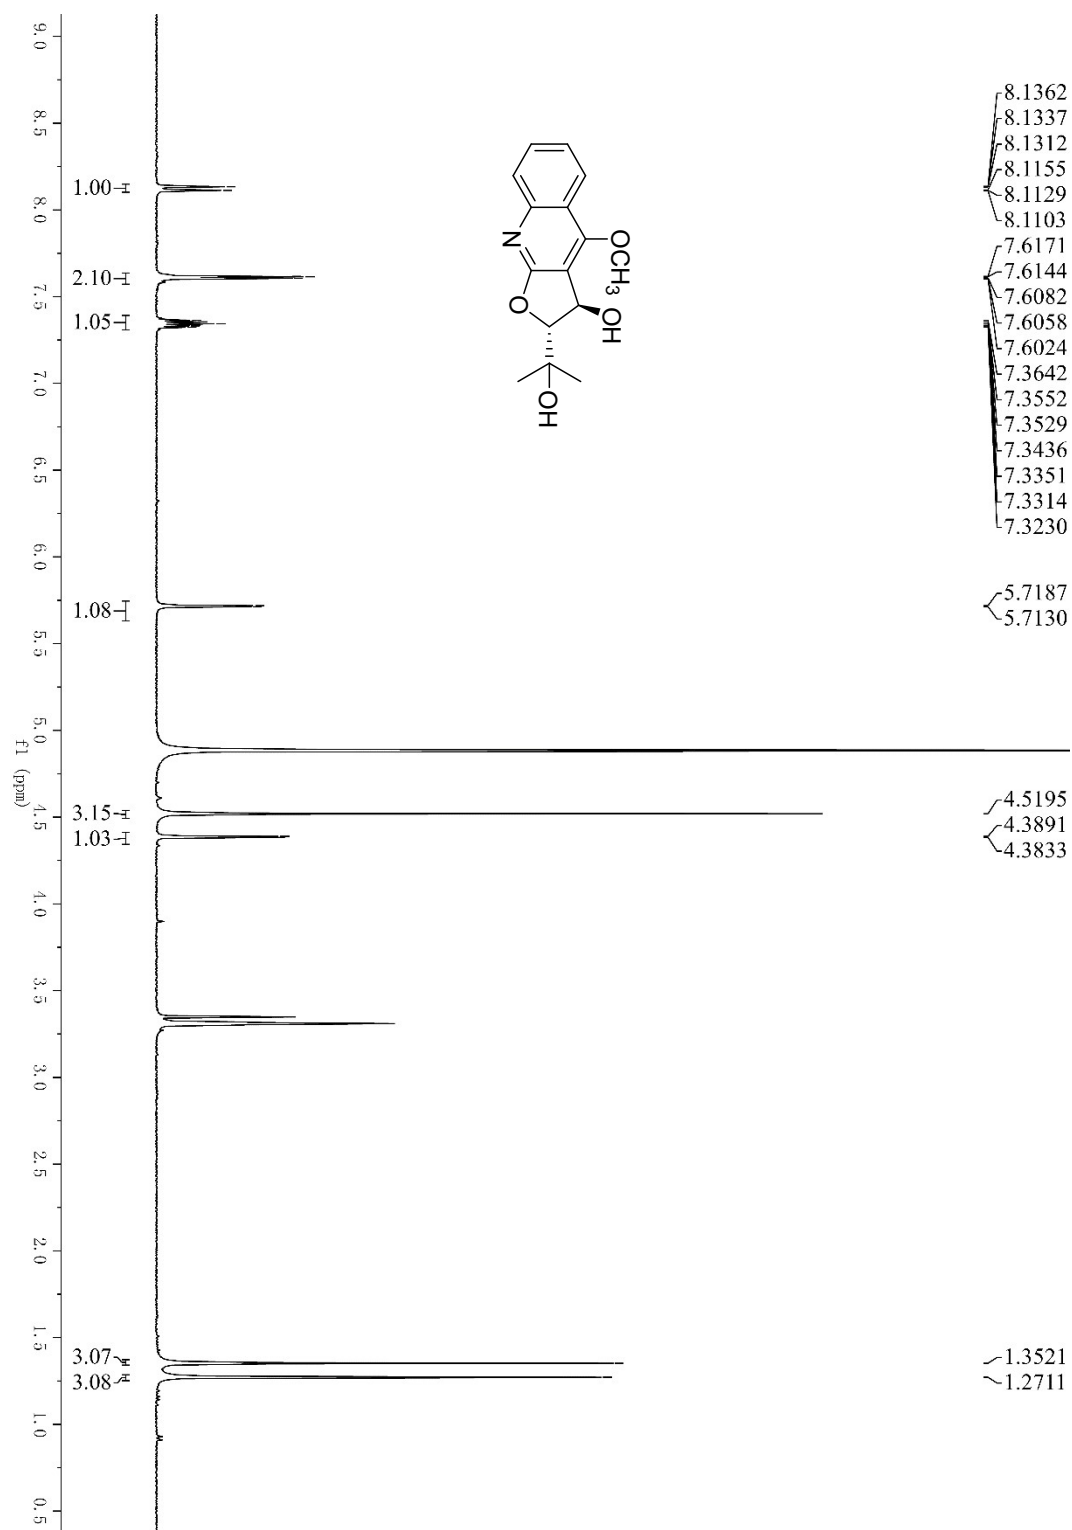

Fig. S60  $^{13}\text{C}$  NMR spectrum of (+)-7 in  $\text{CD}_3\text{OD}$

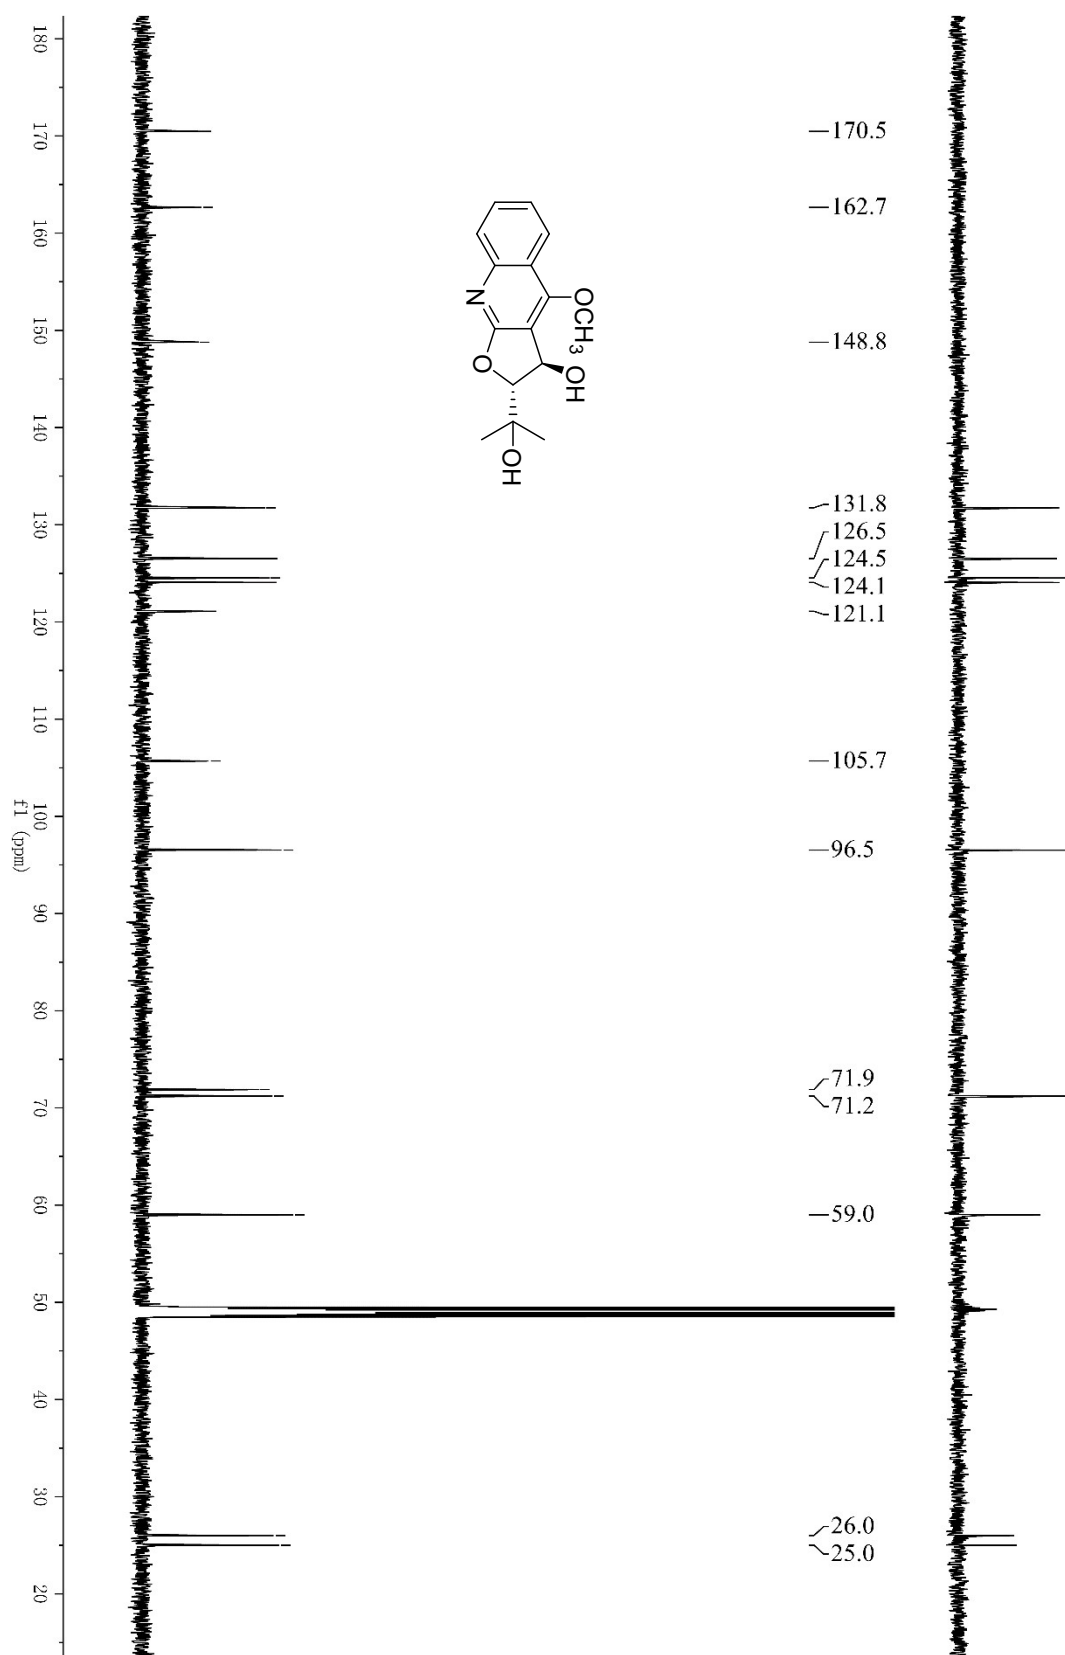

Fig. S61 <sup>1</sup>H NMR spectrum of (-)-7 in CD<sub>3</sub>OD

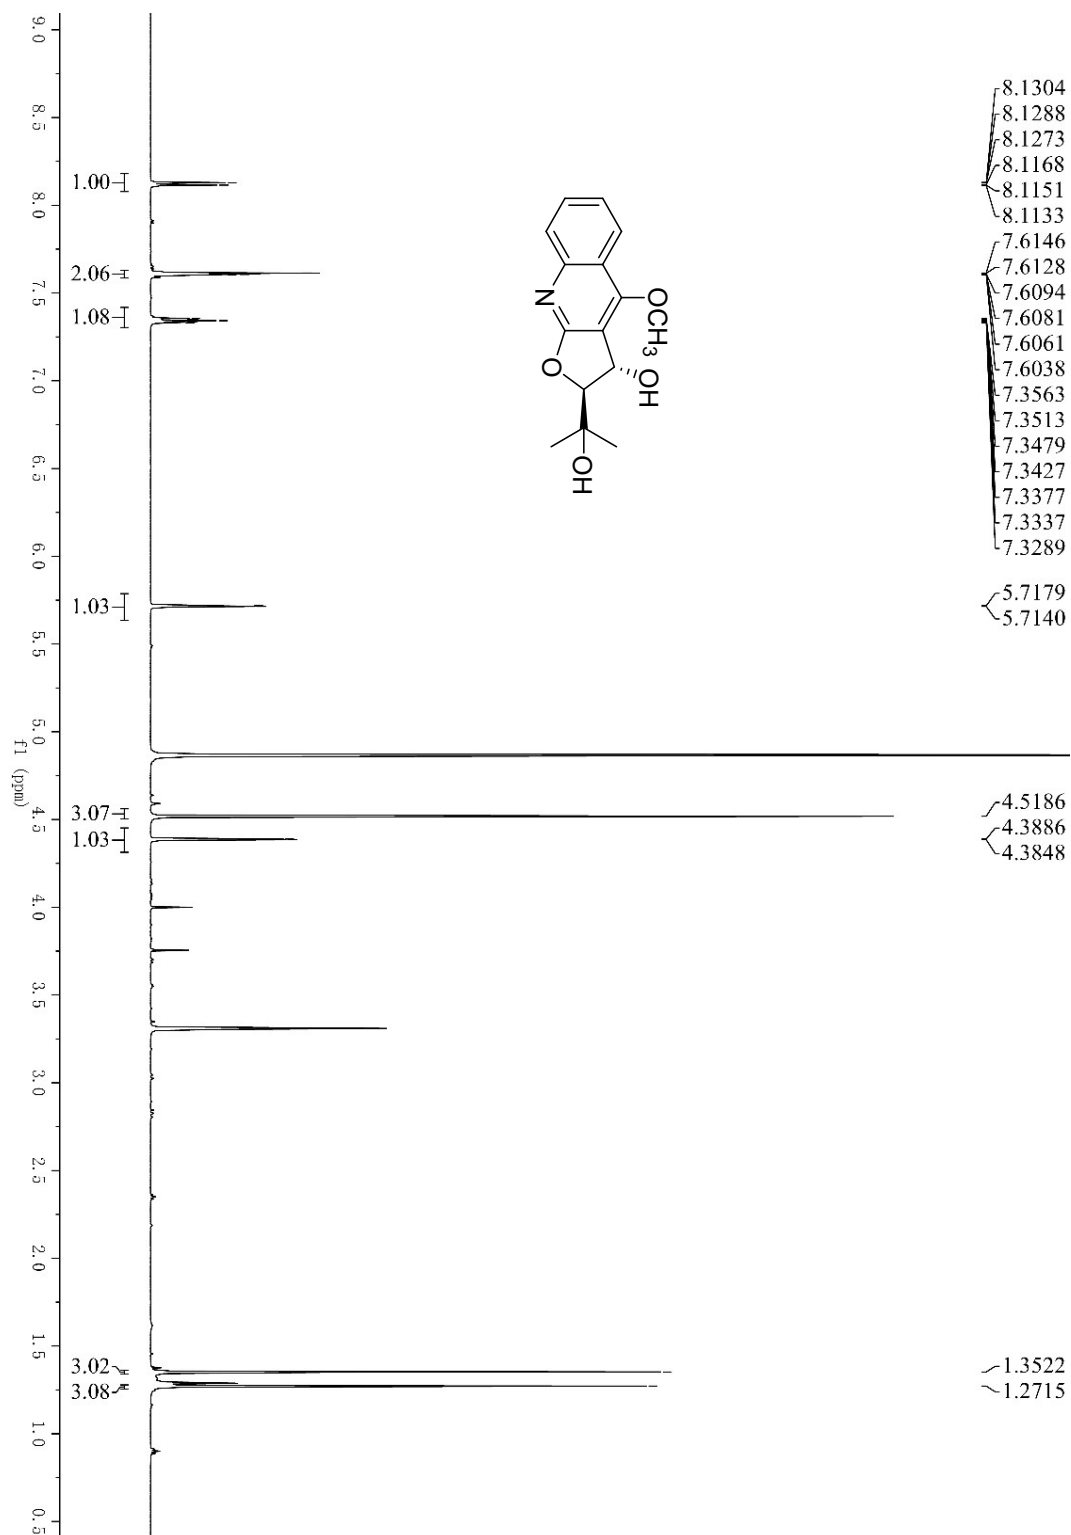

Fig. S62 HSQC spectrum of 7

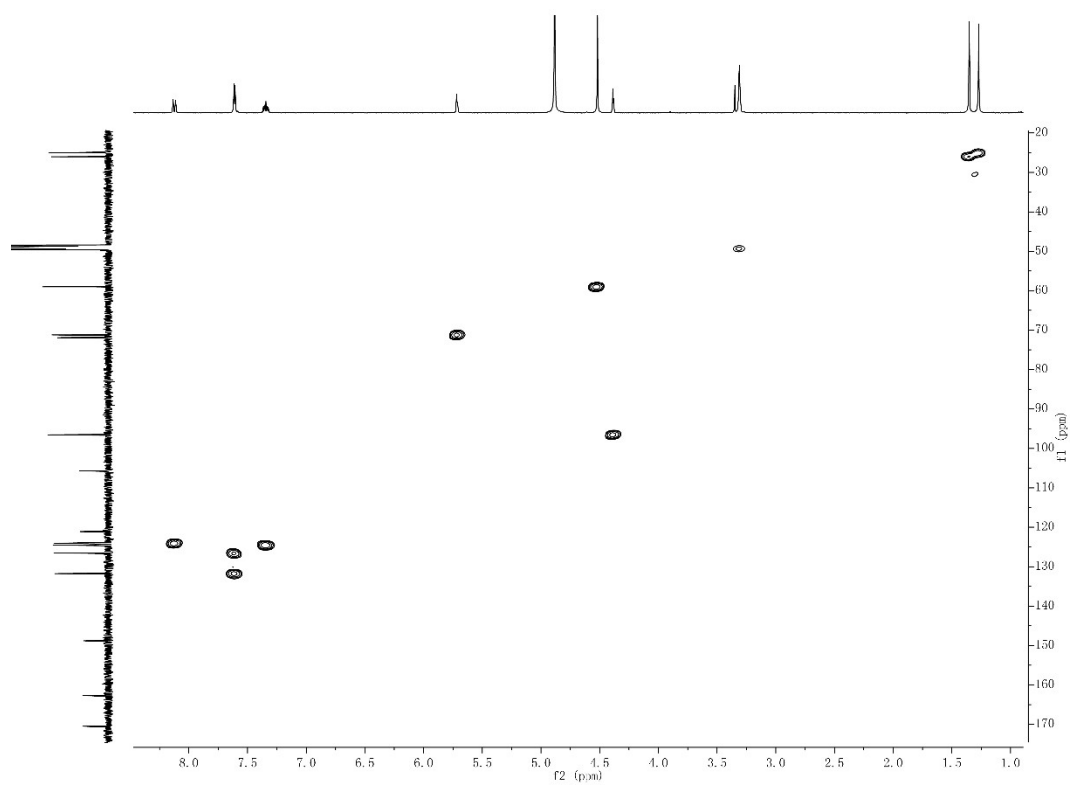

Fig. S63 HSQC spectrum of 7

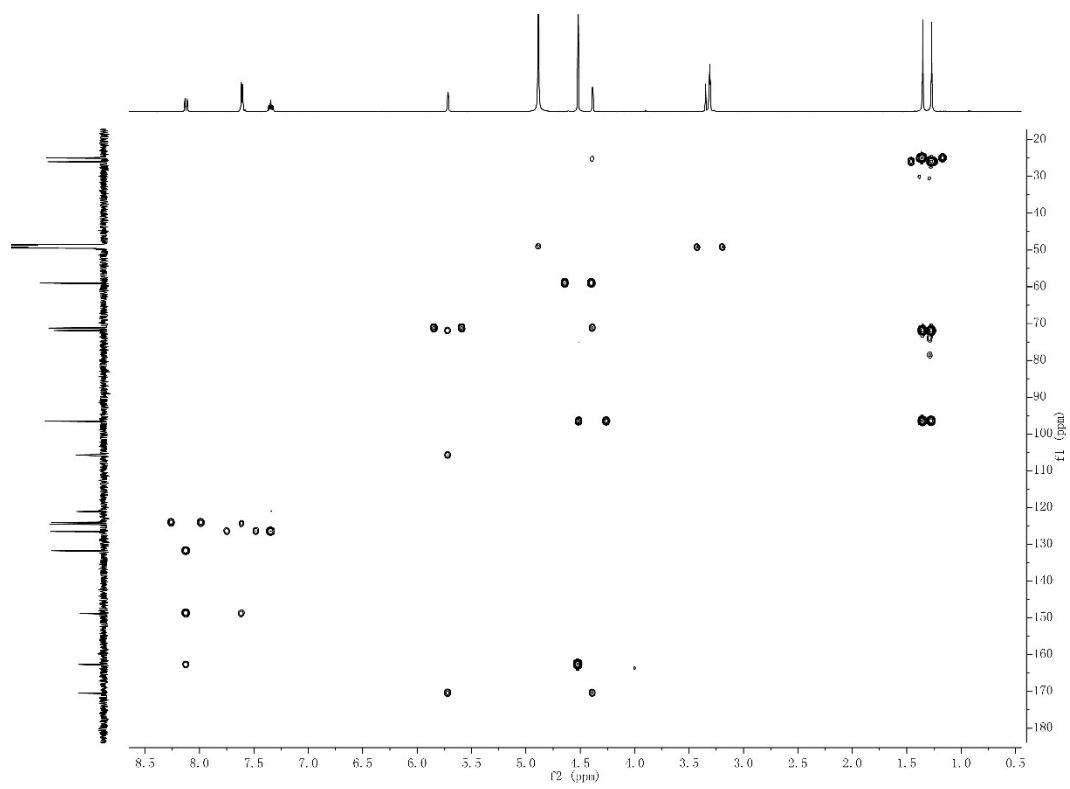



Fig. S64 COSY spectrum of 7

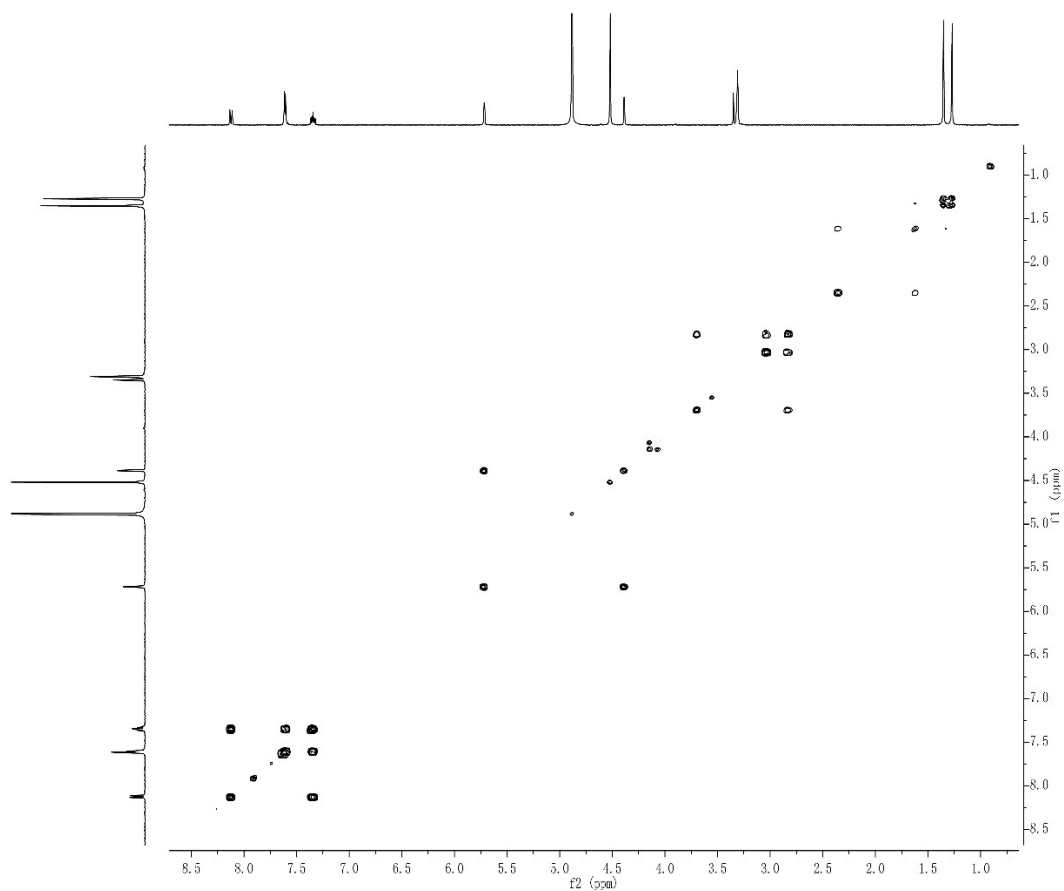

Fig. S65. ESI-MS spectrum of 7

ESIL\_20190830\_YJM\_JKL\_14 #11-12 RT: 0.17-0.19 AV: 2 SB: 9 0.02-0.06, 0.94-1.00 NL: 3.89E6  
T: ITMS + c ESI Full ms [50.00-2000.00]

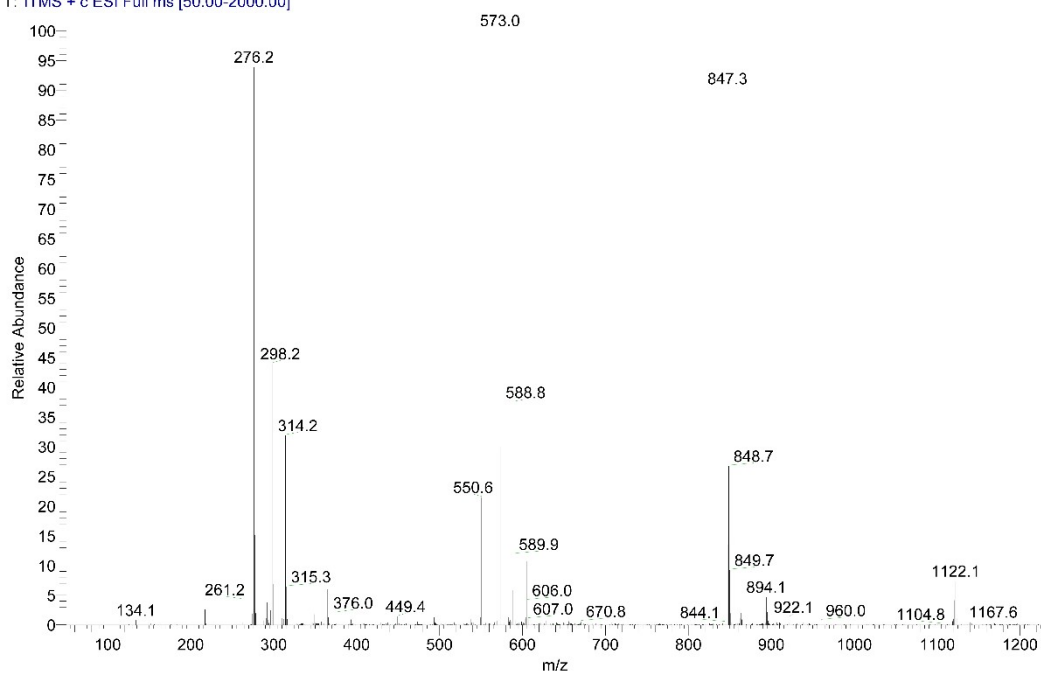

**Fig. S66** HRESI-MS spectrum of **7**

**Qualitative Analysis Report**

|                        |                                        |                               |                             |
|------------------------|----------------------------------------|-------------------------------|-----------------------------|
| <b>Data Filename</b>   | ESI_H_20190830_YJM_JKL_13.d            | <b>Sample Name</b>            | JAZ-6-5B                    |
| <b>Sample Type</b>     | Sample                                 | <b>Position</b>               | P1-B7                       |
| <b>Instrument Name</b> | Agilent G6520 Q-TOF                    | <b>Acq Method</b>             | 20160322_MS_ESIH_POS_1min.m |
| <b>Acquired Time</b>   | 8/30/2019 20:01:05                     | <b>IRM Calibration Status</b> | Success                     |
| <b>DA Method</b>       | small molecular data analysis method.m | <b>Comment</b>                | ESI_H by ZZY                |

**User Spectra**

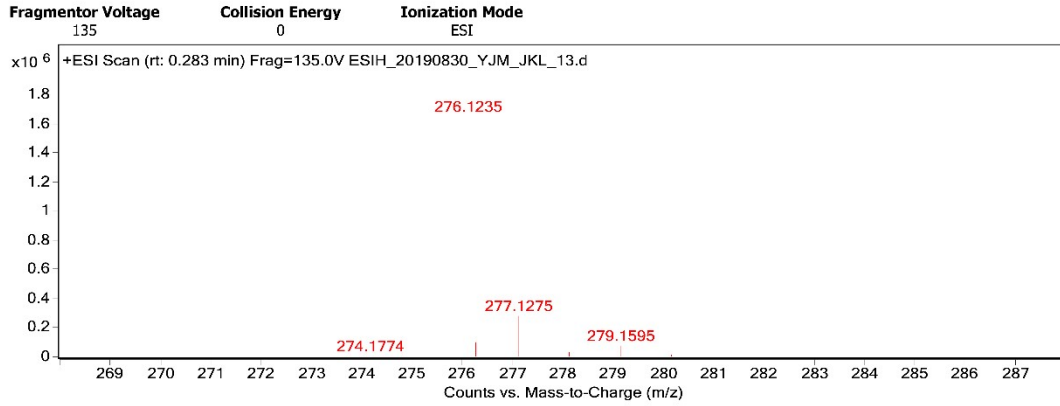

**Formula Calculator Results**

| m/z      | Calc m/z | Diff (mDa) | Diff (ppm) | Ion Formula  | Ion    |
|----------|----------|------------|------------|--------------|--------|
| 276.1235 | 276.123  | -0.42      | -1.51      | C15 H18 N O4 | (M+H)+ |

--- End Of Report ---

Fig. S67 <sup>1</sup>H NMR spectrum of (+)-**8** in CDCl<sub>3</sub>

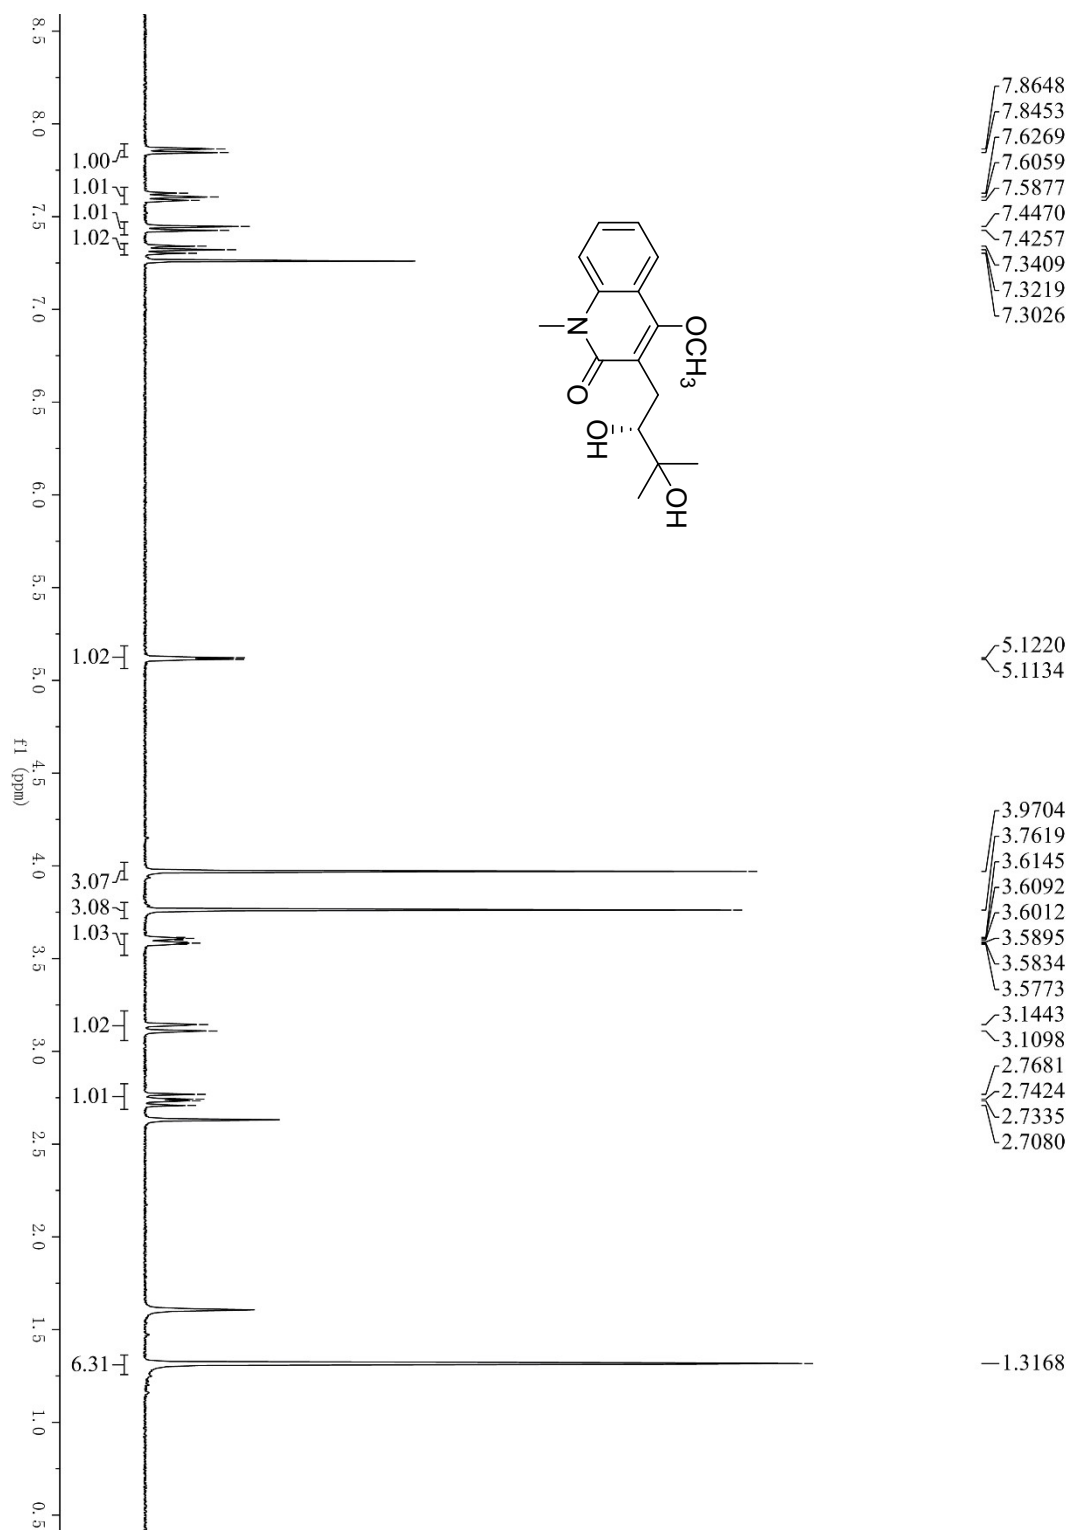

Fig. S68  $^{13}\text{C}$  NMR spectrum of (+)-**8** in  $\text{CDCl}_3$

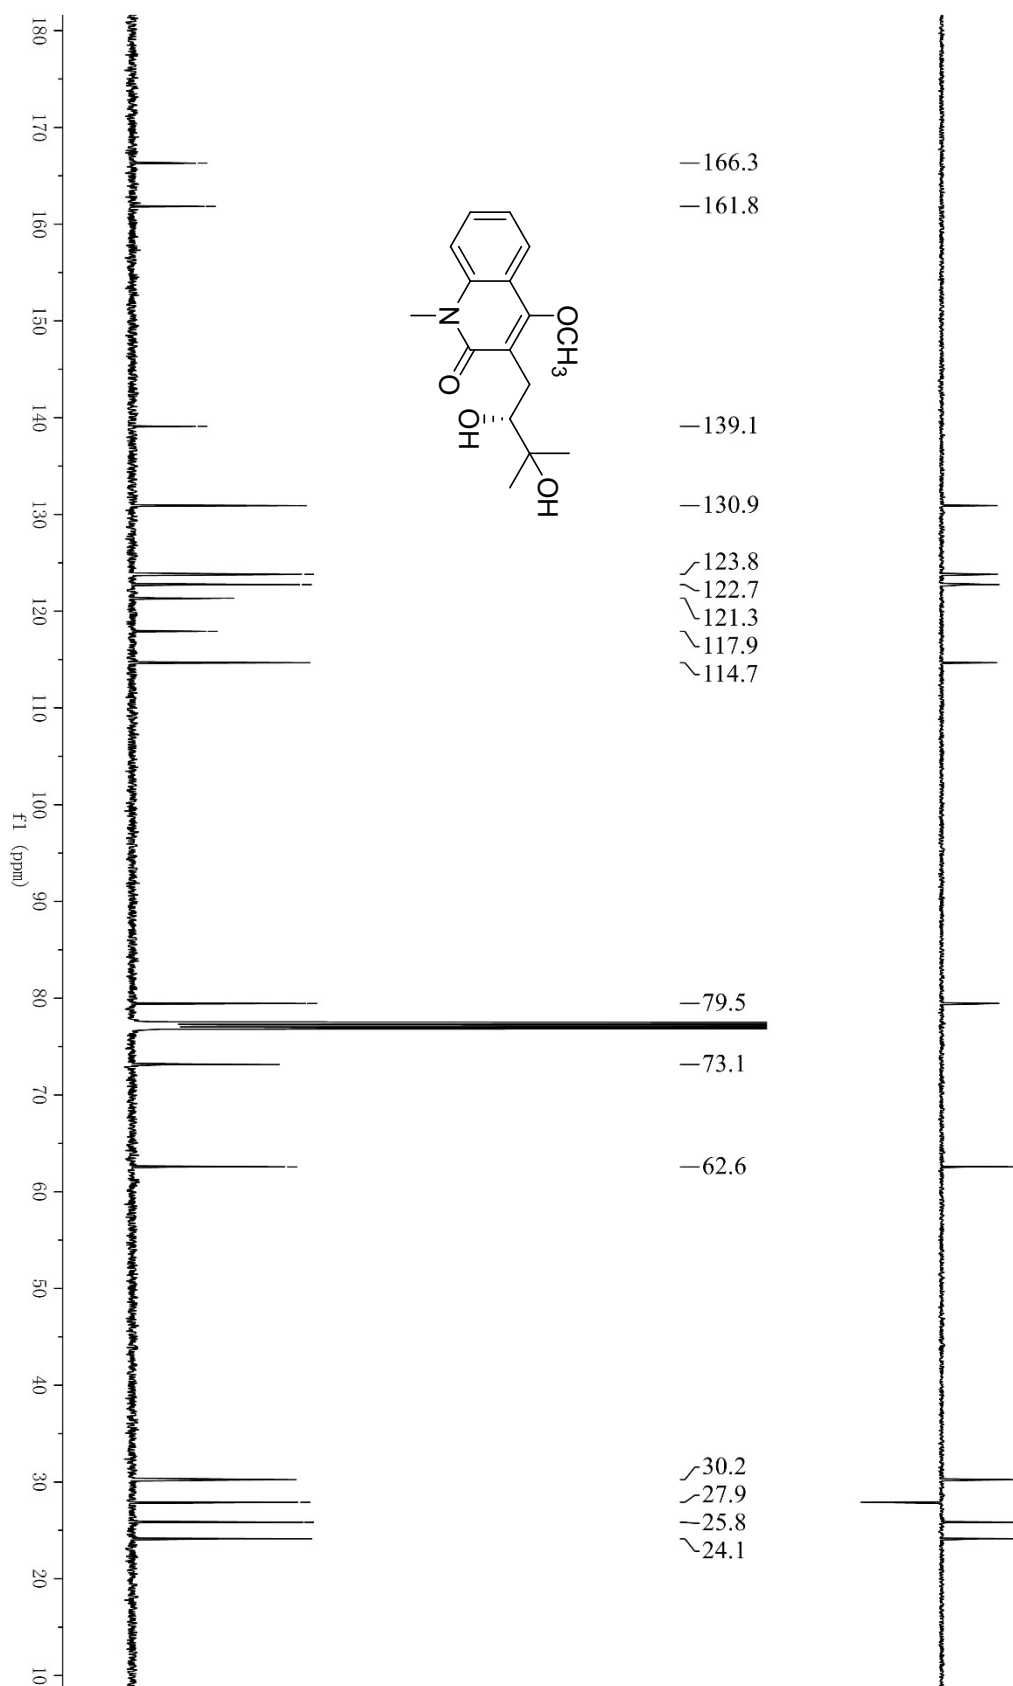

Fig. S69 <sup>1</sup>H NMR spectrum of (-)-**8** in CDCl<sub>3</sub>

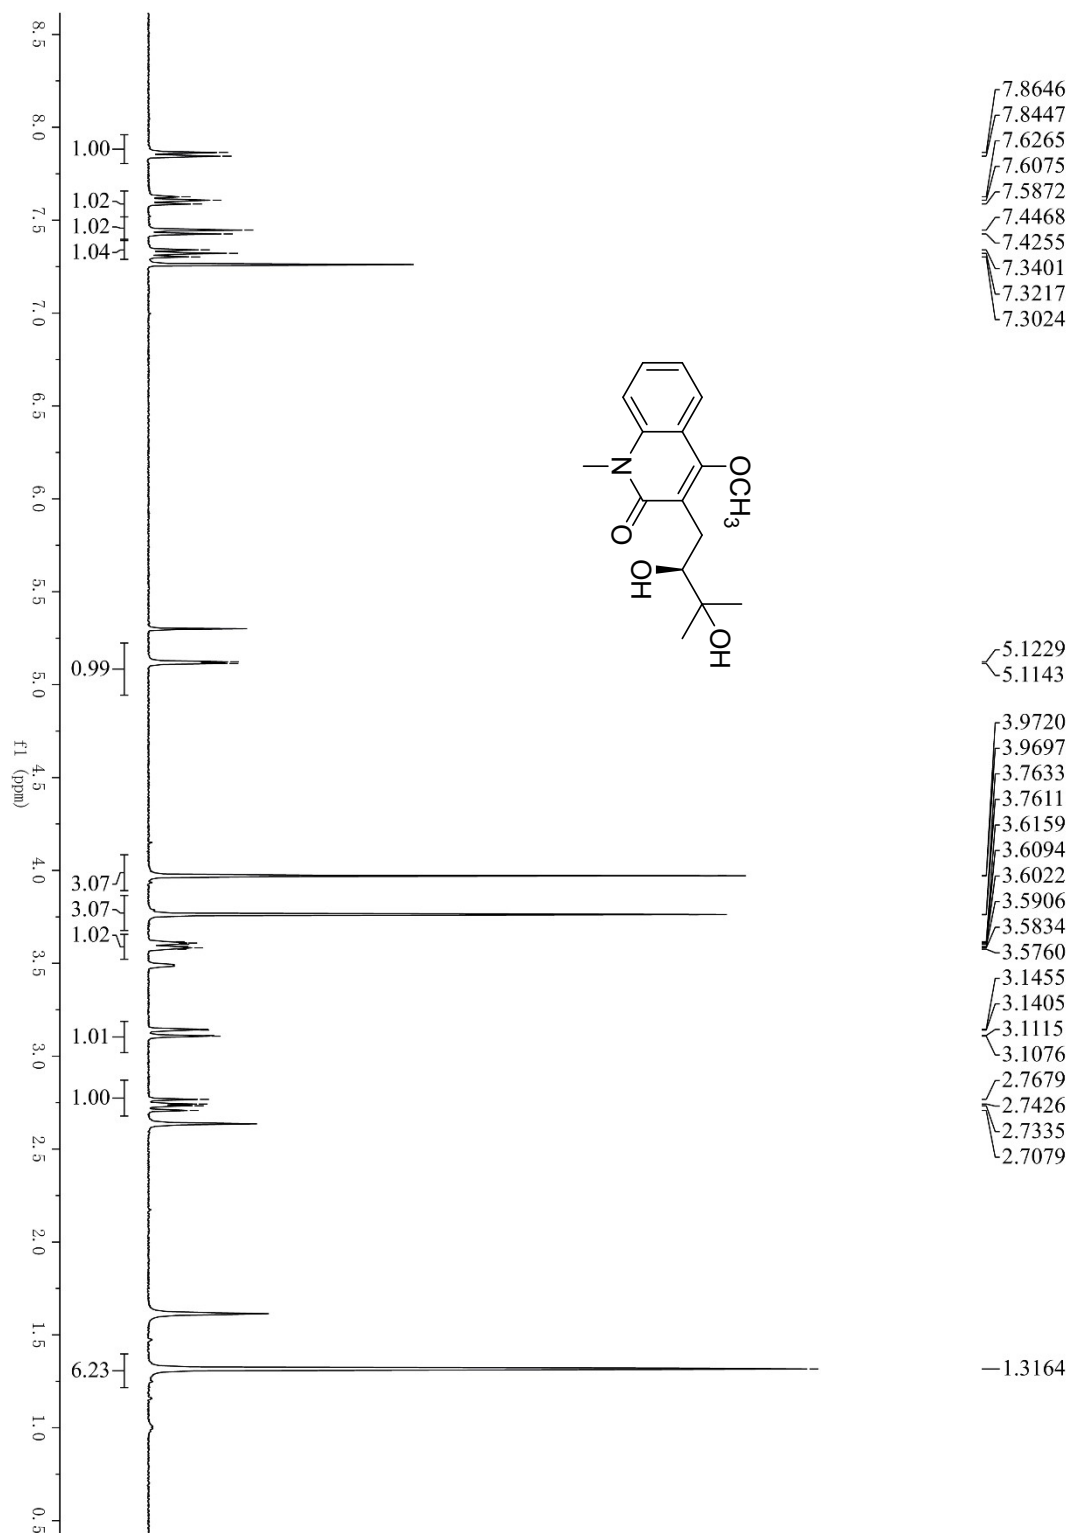

**Fig. S70** ESI-MS spectrum of **8**

ESIL\_20190830\_YJM\_JKL\_15 #31-32 RT: 0.47-0.49 AV: 2 SB: 9 0.02-0.06 , 0.93-0.99 NL: 5.18E6  
T: ITMS + c ESI Full ms [50.00-2000.00]

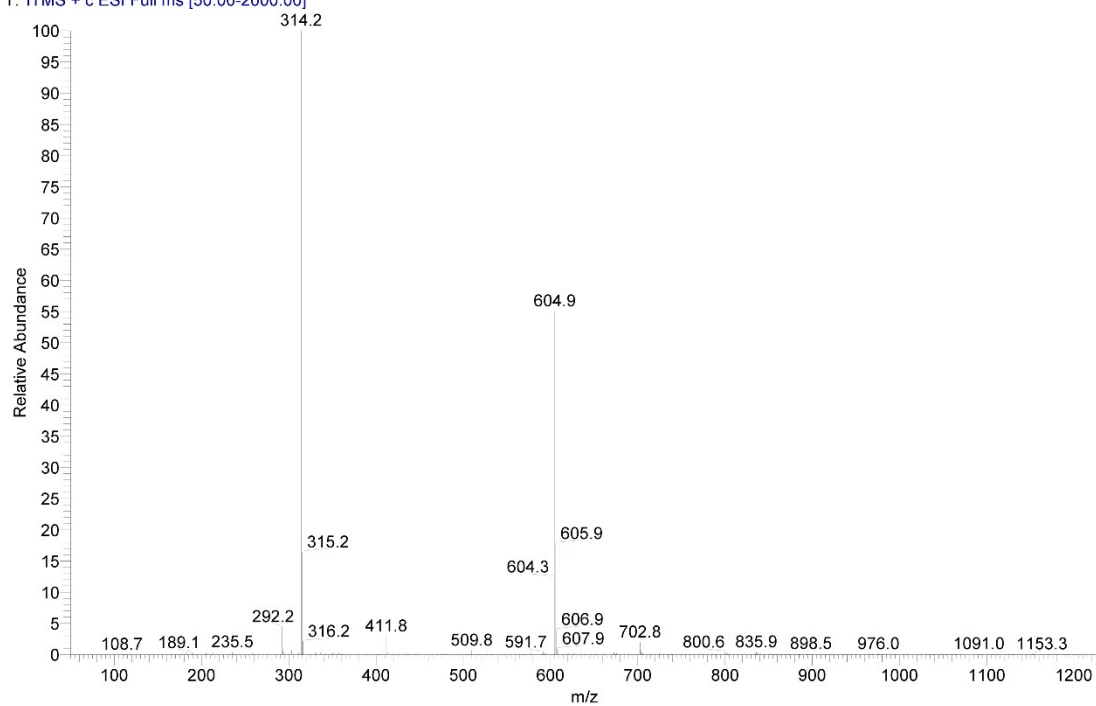

Supplement: d2ob00711h1.pdf [file d2ob00711h1.pdf]
